# Supplementary material for: 1,2,3-Triazole Tethered Hybrid Capsaicinoids as Antiproliferative Agents Active against Lung Cancer Cells (A549)
Source: PubMed Central journal article supplement — ACS Omega. 2022 Sep 1;7(36):32078–100. doi: 10.1021/acsomega.2c03325 (PMC9476207; doi:10.1021/acsomega.2c03325), 2022-09-01

## Supplementary Material

### **1,2,3-Triazole tethered Hybrid Capsaicinoids as anti-proliferative agents active against Lung cancer cells (A549)**

Arif Khan<sup>1</sup>, Fatima Naaz<sup>1</sup>, Rafia Basit<sup>2</sup>, Deepak Das<sup>1</sup>, Piyush Bisht<sup>3</sup>, Majeed Shaikh<sup>4</sup>, Bilal Ahmad lone<sup>3</sup>, Yuba Raj Pokharel<sup>3</sup>, Qazi Naveed Ahmed<sup>4</sup>, Shazia parveen<sup>5</sup>, Intzar Ali<sup>6</sup>, Shashank Kumar Singh<sup>2</sup>, Gousia Chashoo<sup>2\*</sup>, Syed Shafi<sup>1\*</sup>

---

<sup>1</sup> Department of Chemistry, School of Chemical and Life Sciences, Jamia Hamdard, Hamdard Nagar, New Delhi-110062, India.

<sup>2</sup> Pharmacology Division, CSIR-Indian Institute of Integrative Medicine, Jammu, 180001, India.

<sup>3</sup> Faculty of Life Sciences and Biology, South Asian University, New Delhi-110021, India.

<sup>4</sup> Natural product and Medicinal Chemistry Division, CSIR-Indian Institute of Integrative Medicine, Jammu, 180001, India.

<sup>5</sup> Faculty of Science, Chemistry Department, Taibah University, Yanbu Branch, Yanbu-46423, Saudi Arabia.

<sup>6</sup> Department of Microbiology, Hamdard Institute of Medical Sciences and Research, Jamia Hamdard.

\*Corresponding author: e-mail: [syedshafi@jamiahamdard.ac.in](mailto:syedshafi@jamiahamdard.ac.in), [chashoo.gousia@gmail.com](mailto:chashoo.gousia@gmail.com)

## INDEX

| S. No. | Title                                                                                                                      | Pages  |
|--------|----------------------------------------------------------------------------------------------------------------------------|--------|
| 1.     | Dose response curve of compounds 18b, 18c, 18f, 18m. <b>Figure: S1</b>                                                     | S3     |
| 2.     | Compound <b>14j</b> inhibits the migration capacities of NCI-H460 cells.<br><b>Figure: S2</b>                              | S4     |
| 3.     | Toxicity of <b>18f</b> , <b>Figure S3</b>                                                                                  | S4     |
| 4.     | Compound <b>14j</b> inhibits the colony forming ability of NCI-H460 cells.<br><b>Figure: S4</b>                            | S4     |
| 5.     | Spectral data <b>S5</b> ( <sup>1</sup> H, <sup>13</sup> C, ESI-MS, LC-MS, HRMS) of 13, 14a-p and 16a, 16b, 16c, 17, 18a-p. | S5-S75 |

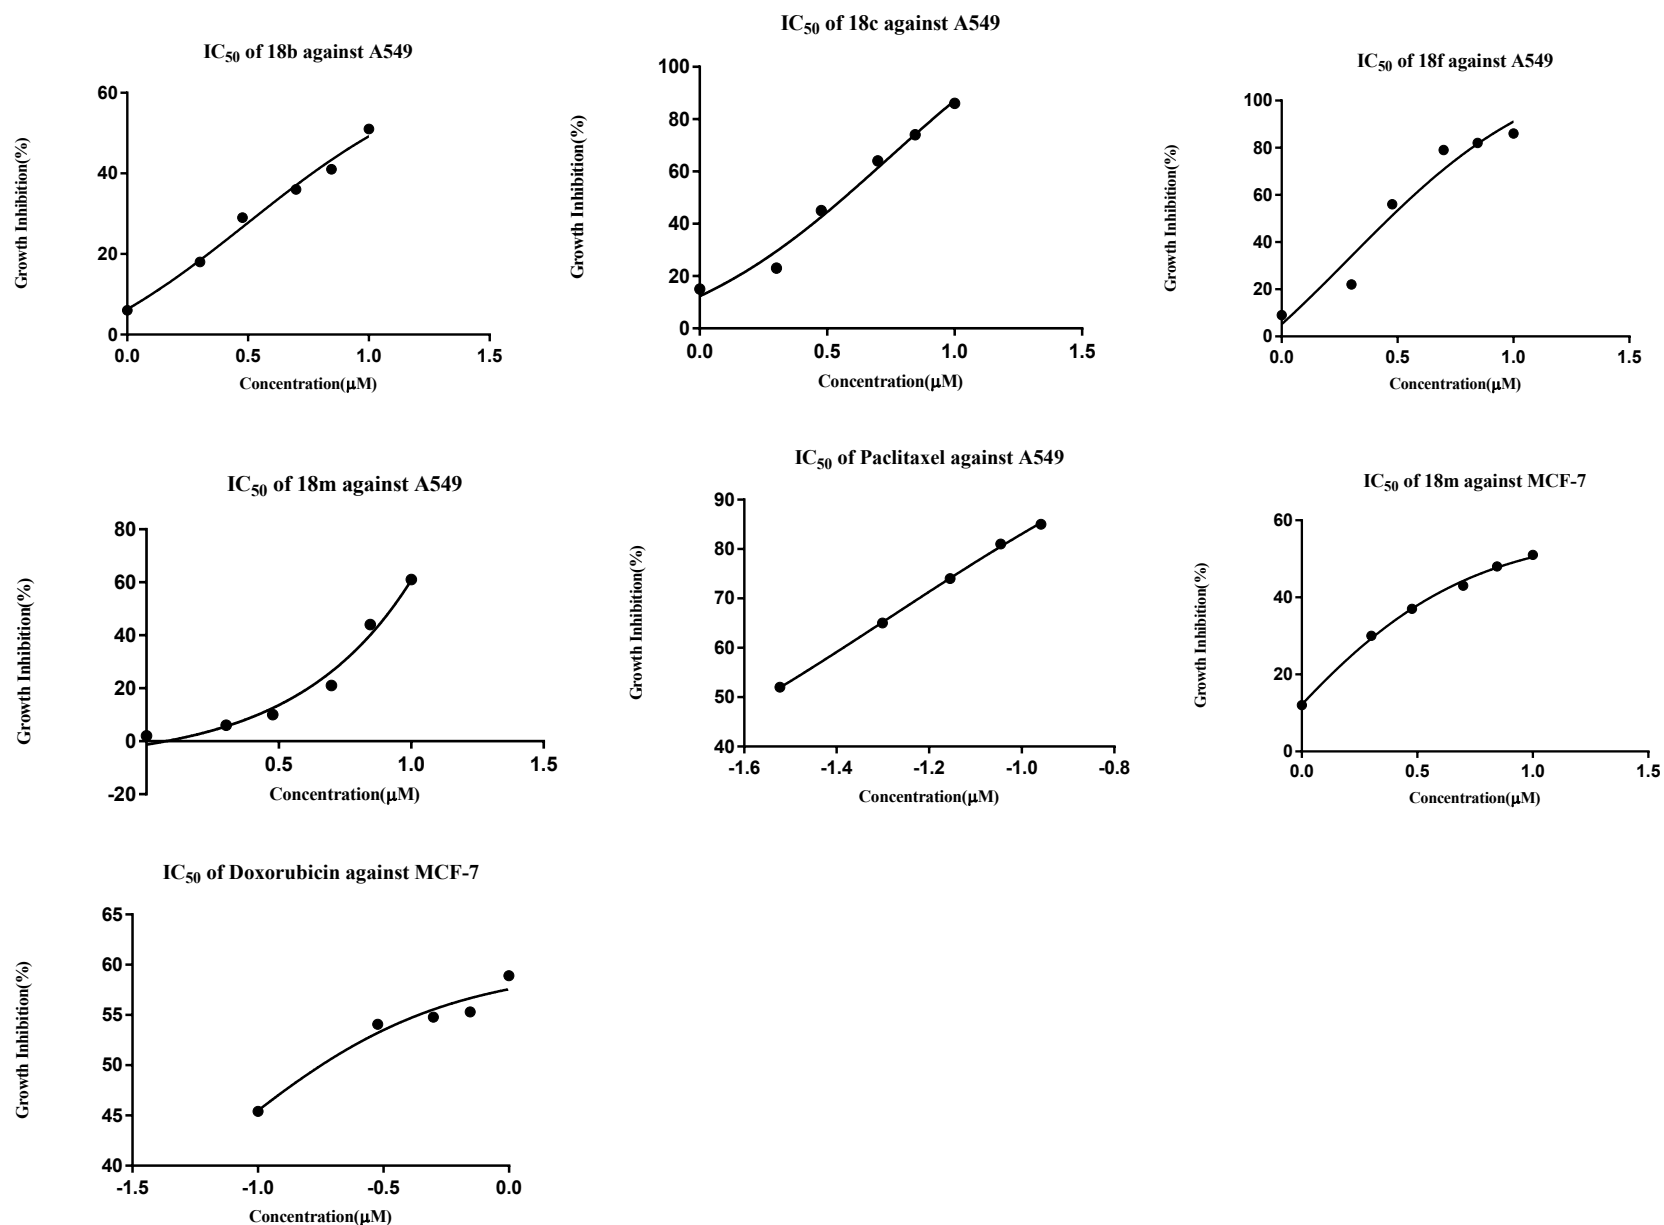

**Figure S1:** Dose response curve of compounds **18b**, **18c**, **18f**, **18m** and paclitaxel against A549 cell line. And another dose response curve of compound **18m** and doxorubicin toward breast (MCF-7) cancer cell line.

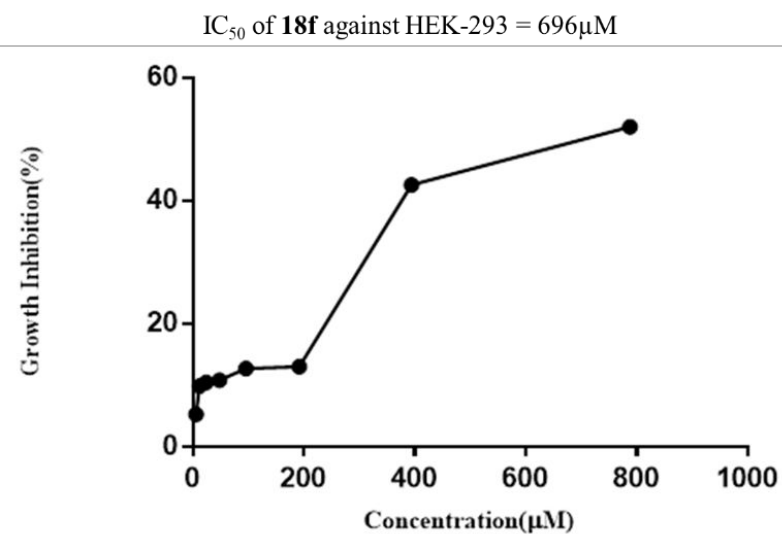

**Figure S2:** Selectivity Index=696/6=116, IC<sub>50</sub> of the compound 18f in HEK-293 (normal kidney cells) was 116-fold higher as compared to A549 cell line. So, it has high safety index.

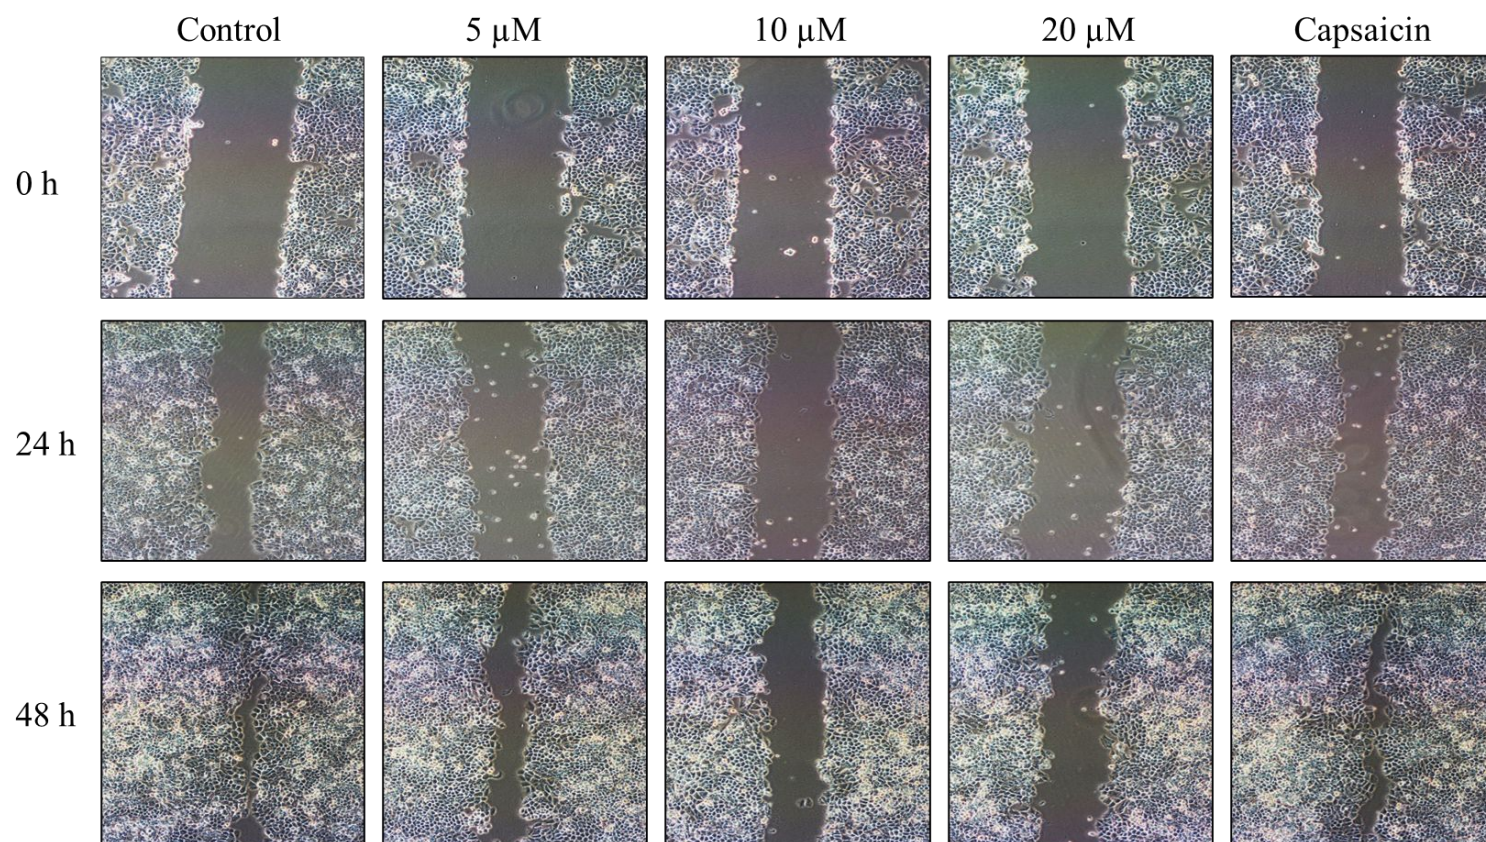

**Figure S3:** Compound **14j** inhibits the migration capacities of NCI-H460 cells.

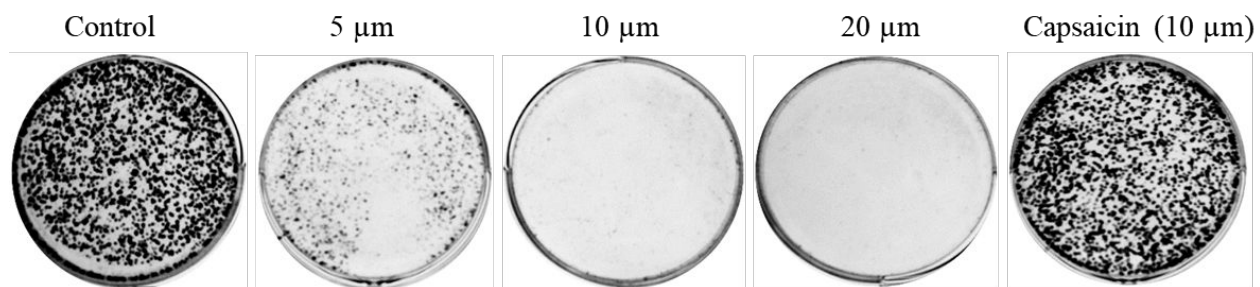

**Figure S4:** Compound **14j** inhibits the colony forming ability of NCI-H460 cells.

**Spectral data S5:**  $^1\text{H-NMR}$ ,  $^{13}\text{C-NMR}$ , ESI-MS, LC-MS and HRMS of 13, 14a-p and 16a, 16b, 16c, 17, 18a-p.

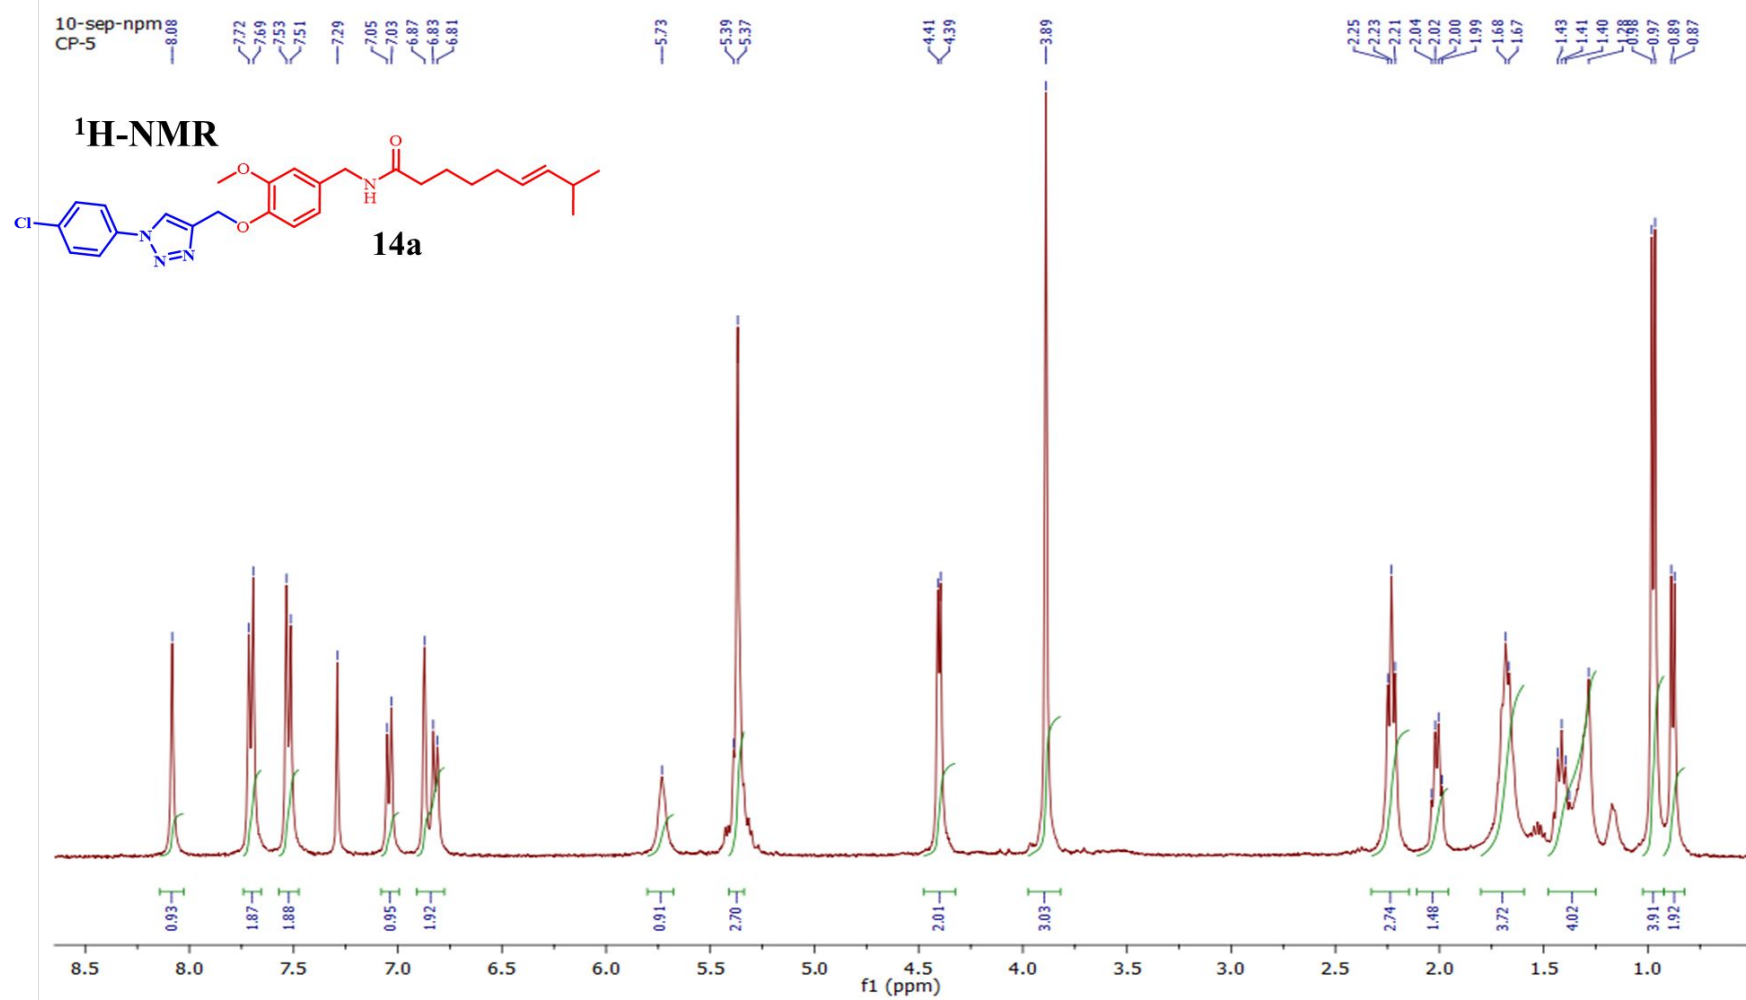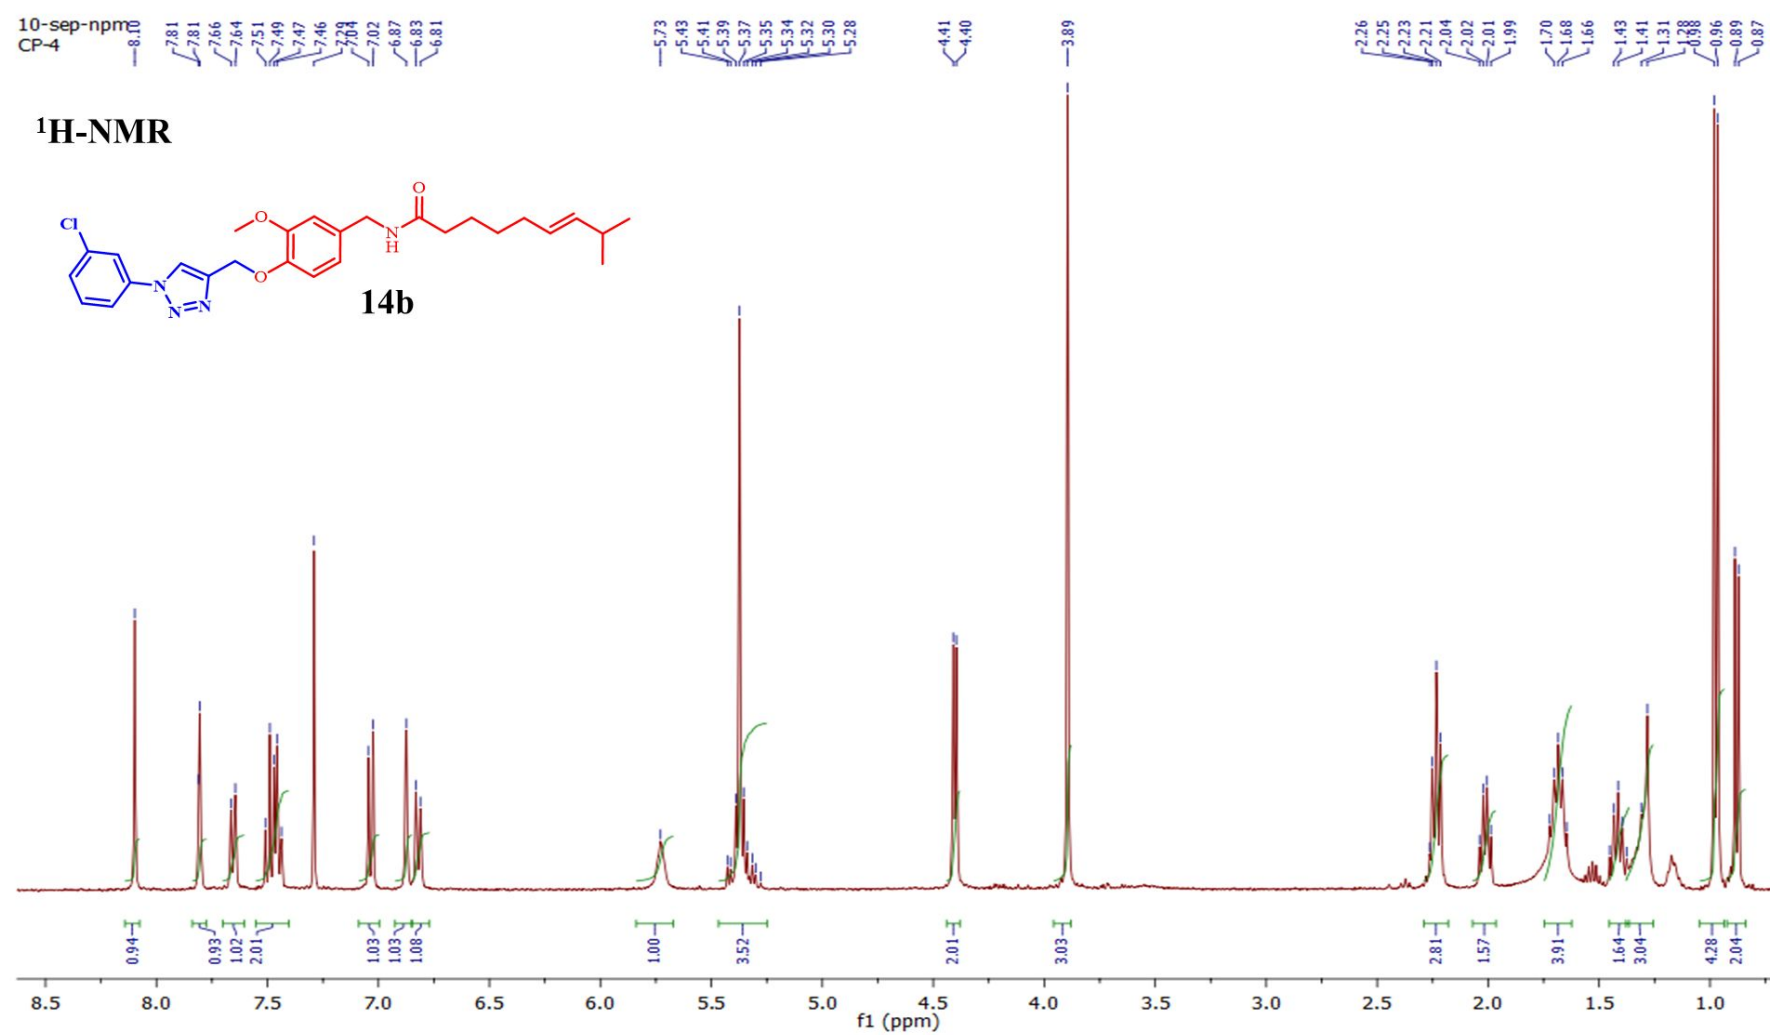

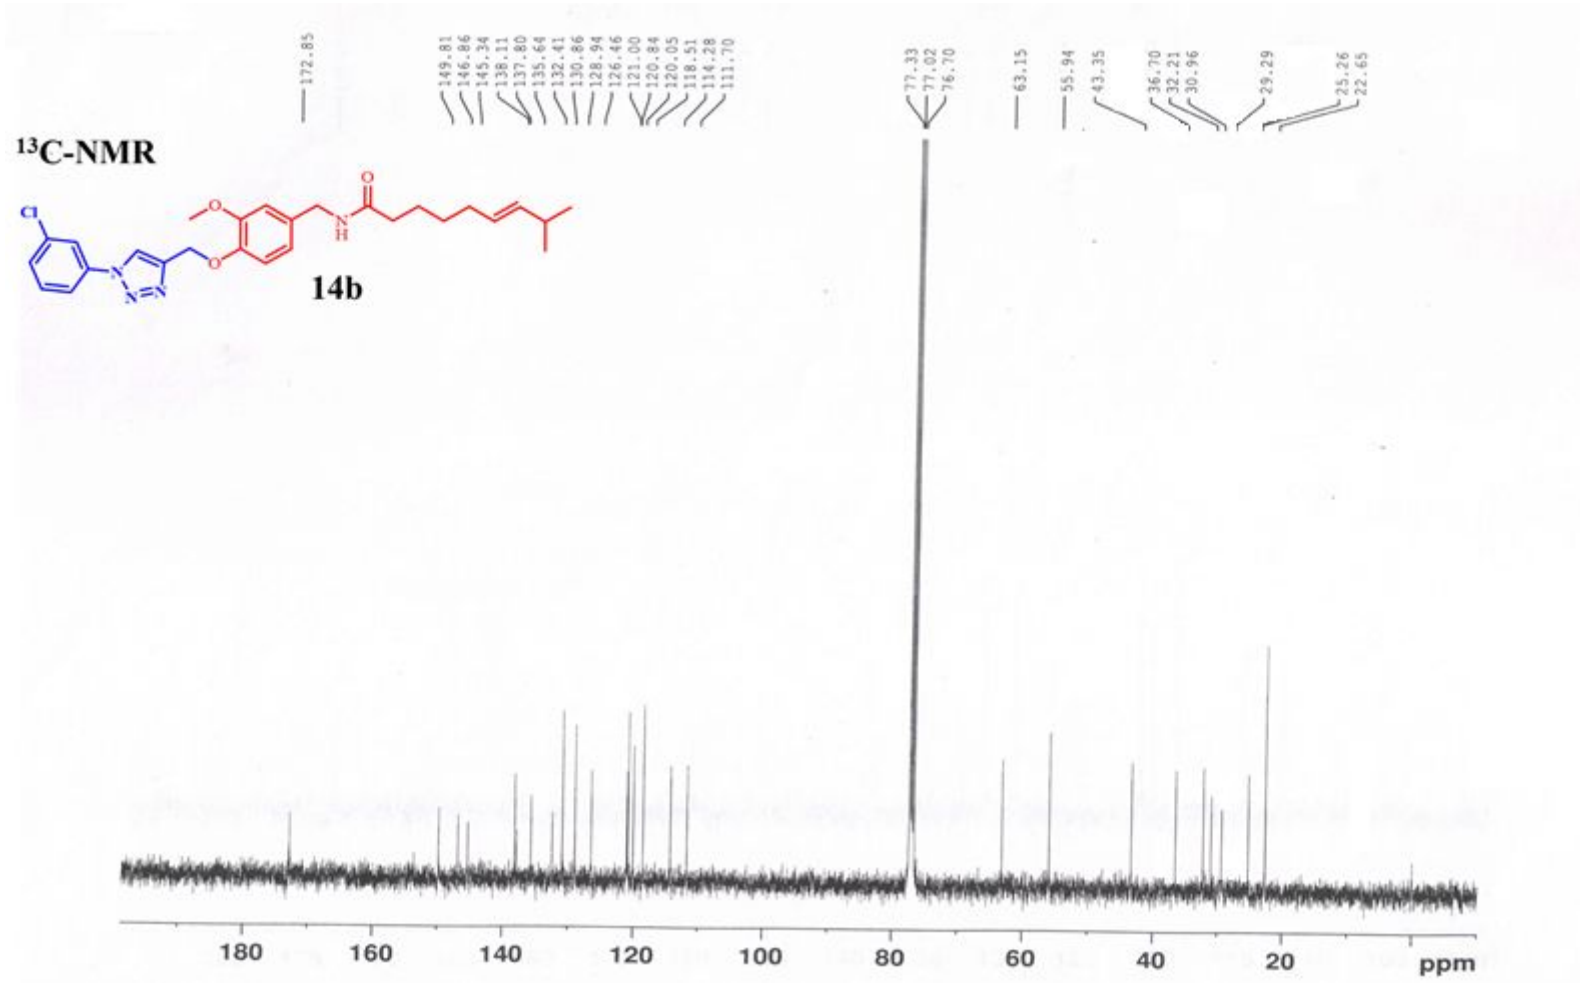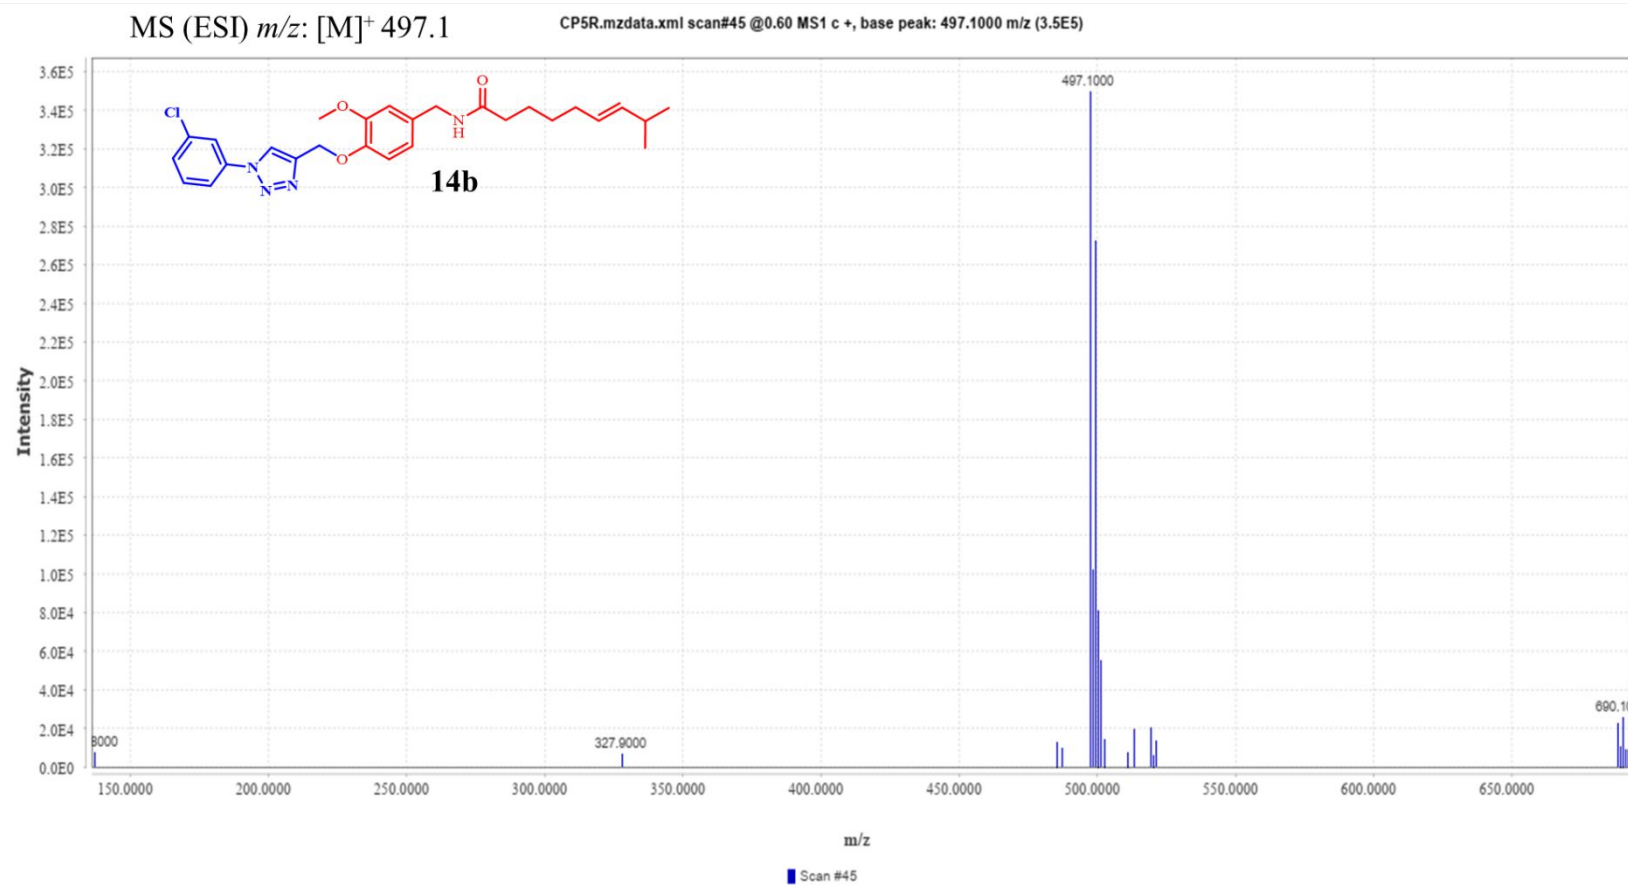

10-sep-npm  
CP-3

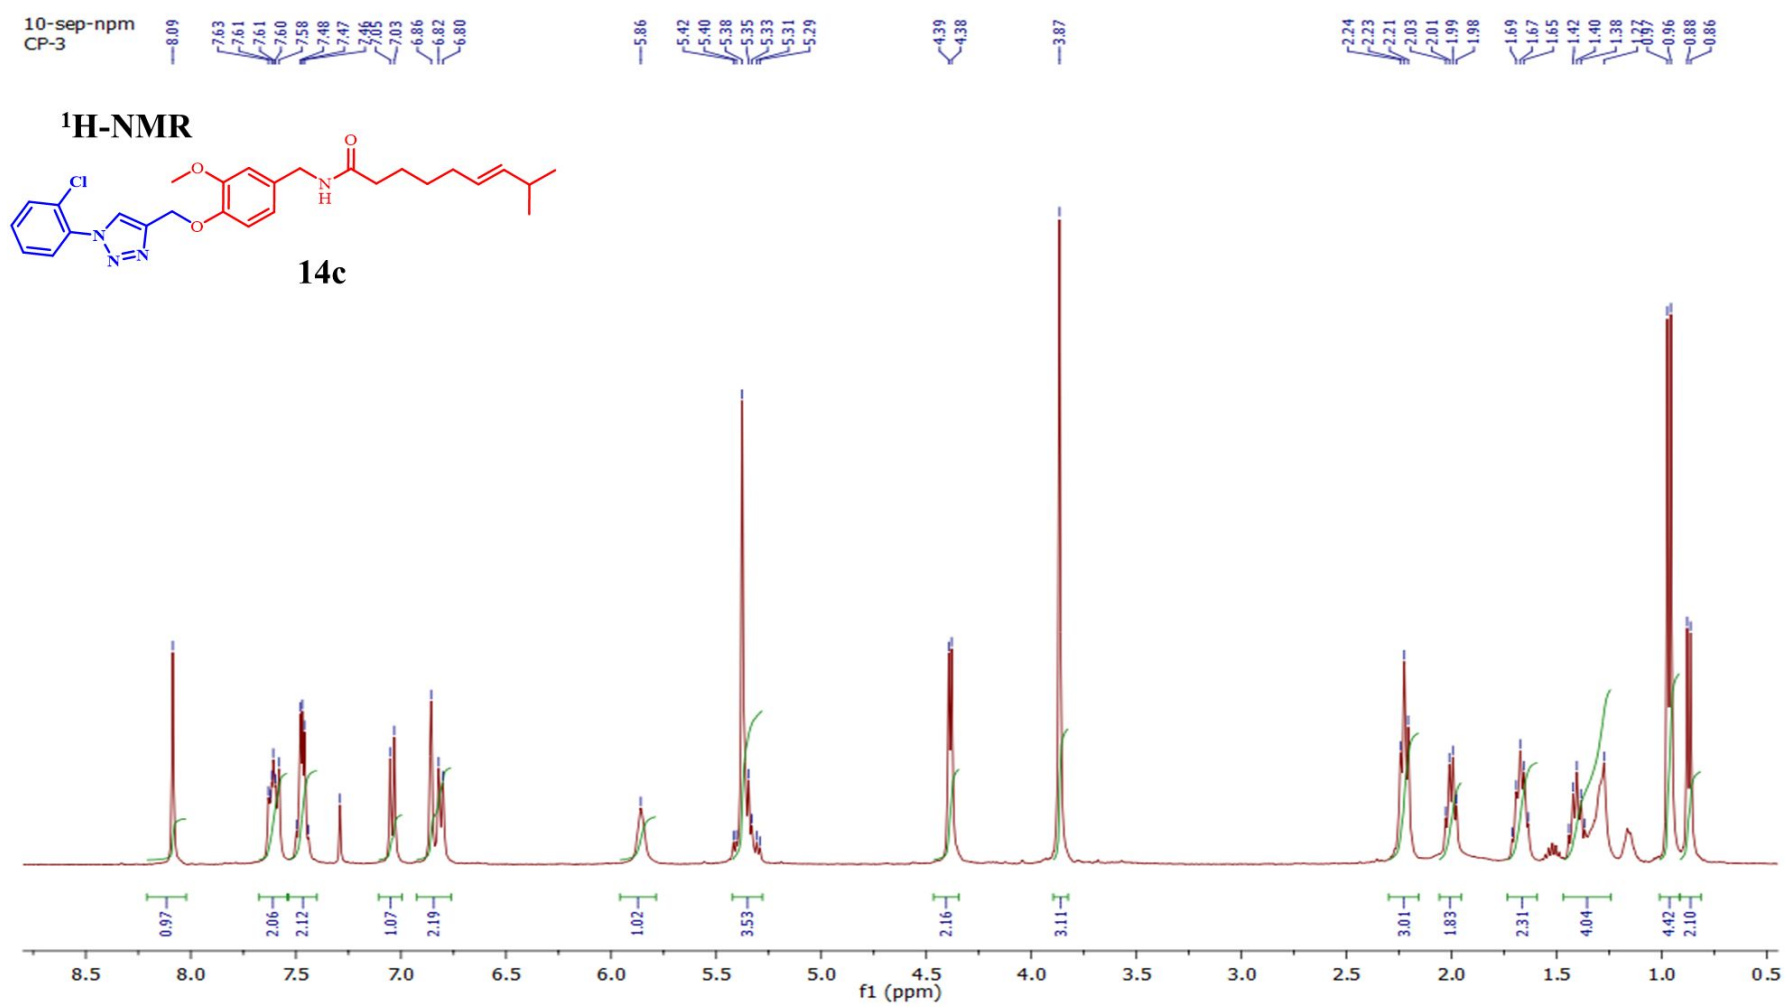

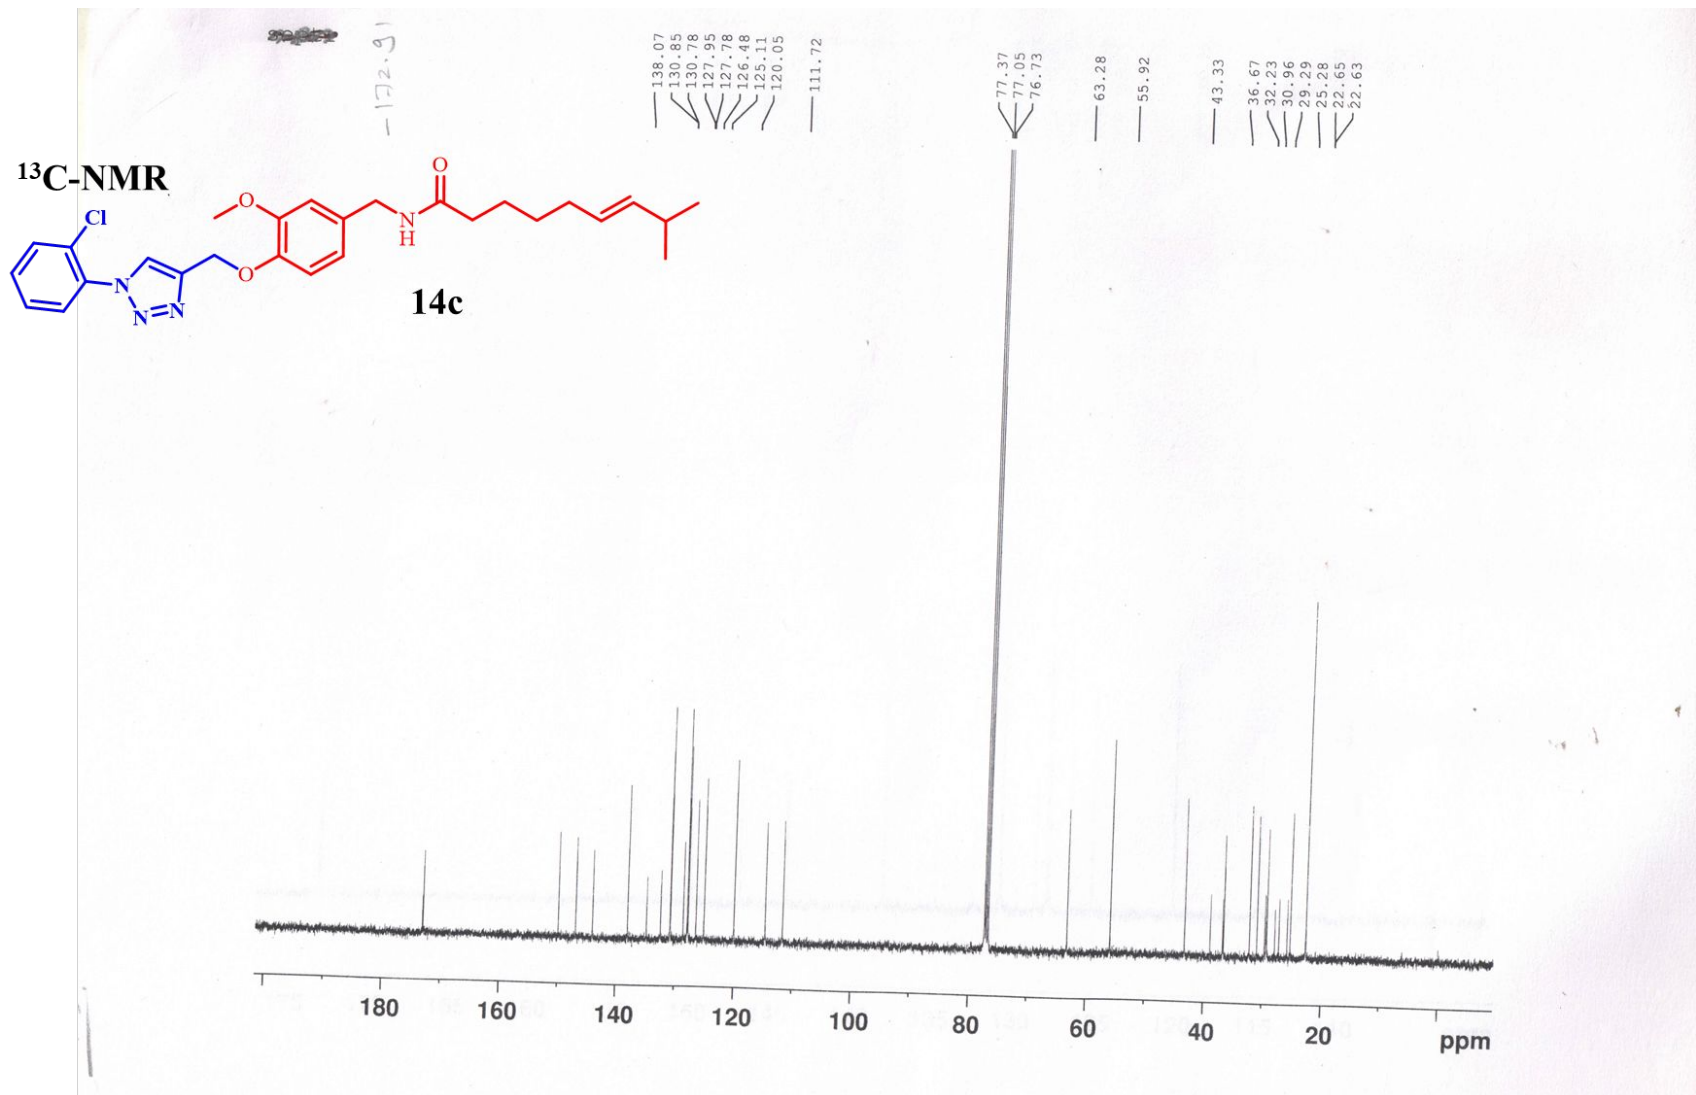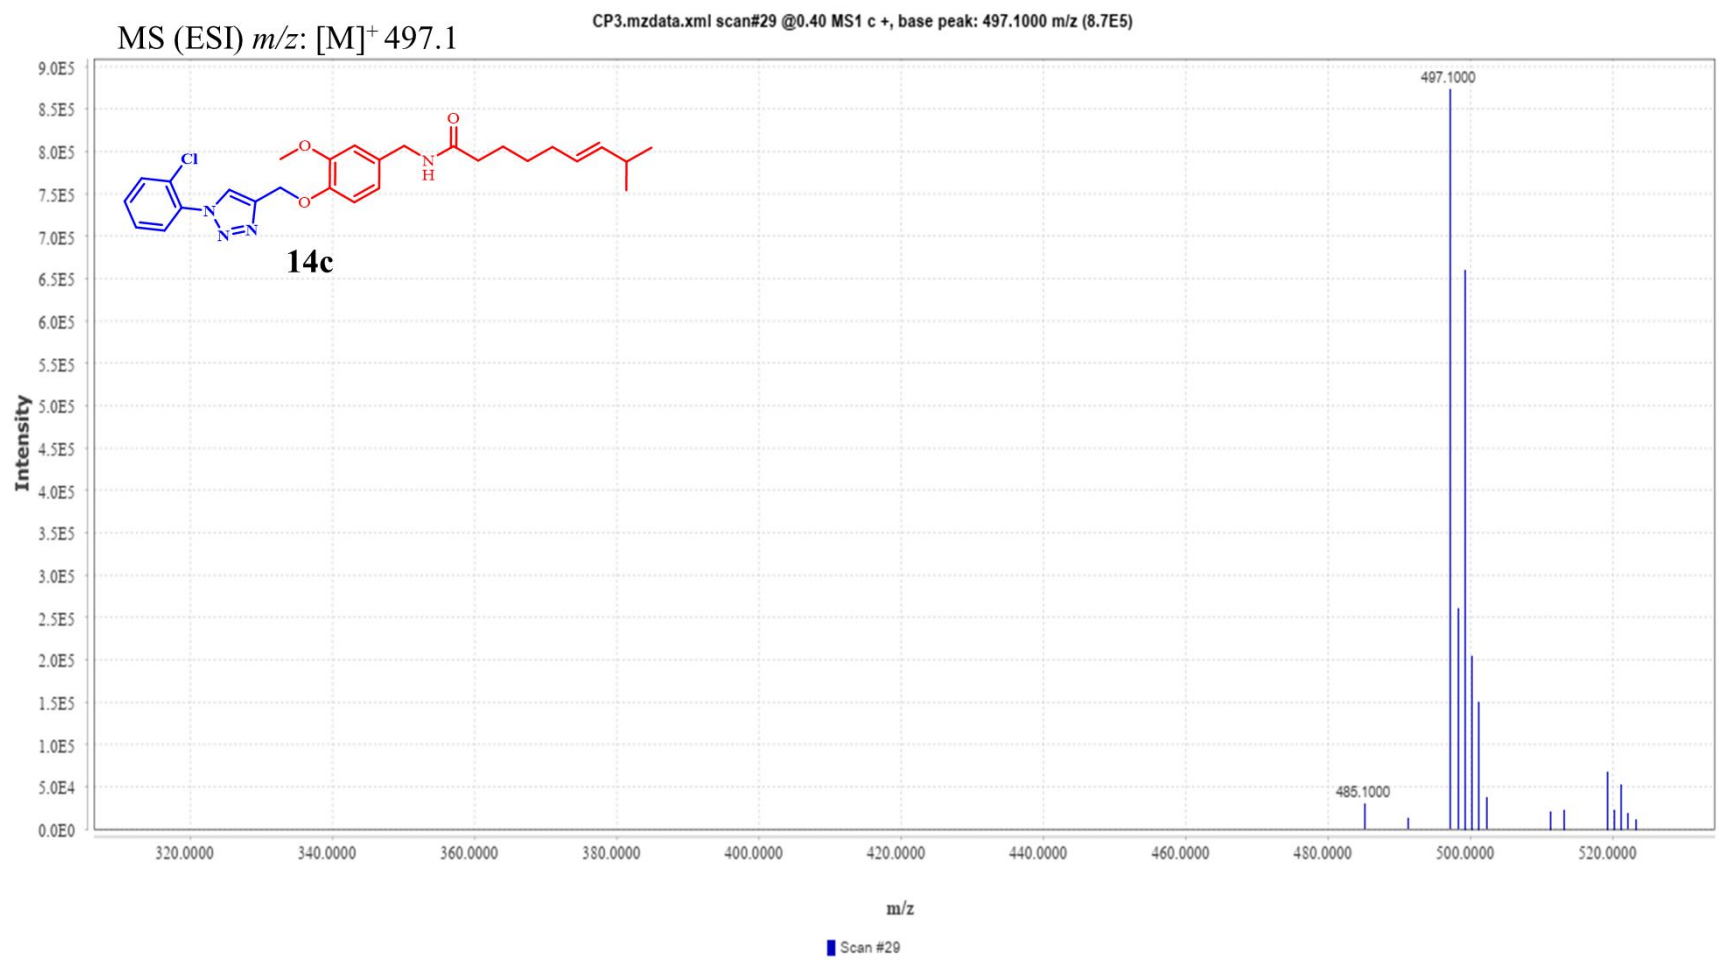



10-sep-npm  
CP-6

8.09 7.91 7.62 7.29 7.01 6.99 6.86 6.82 6.80 5.83 5.38 5.37 5.36 5.34 4.40 4.38 3.88 2.25 2.23 2.21 2.03 2.01 2.00 1.98 1.70 1.68 1.66 1.41 1.30 1.28 0.97 0.96 0.88 0.86

### <sup>1</sup>H-NMR

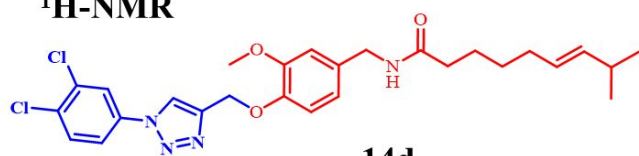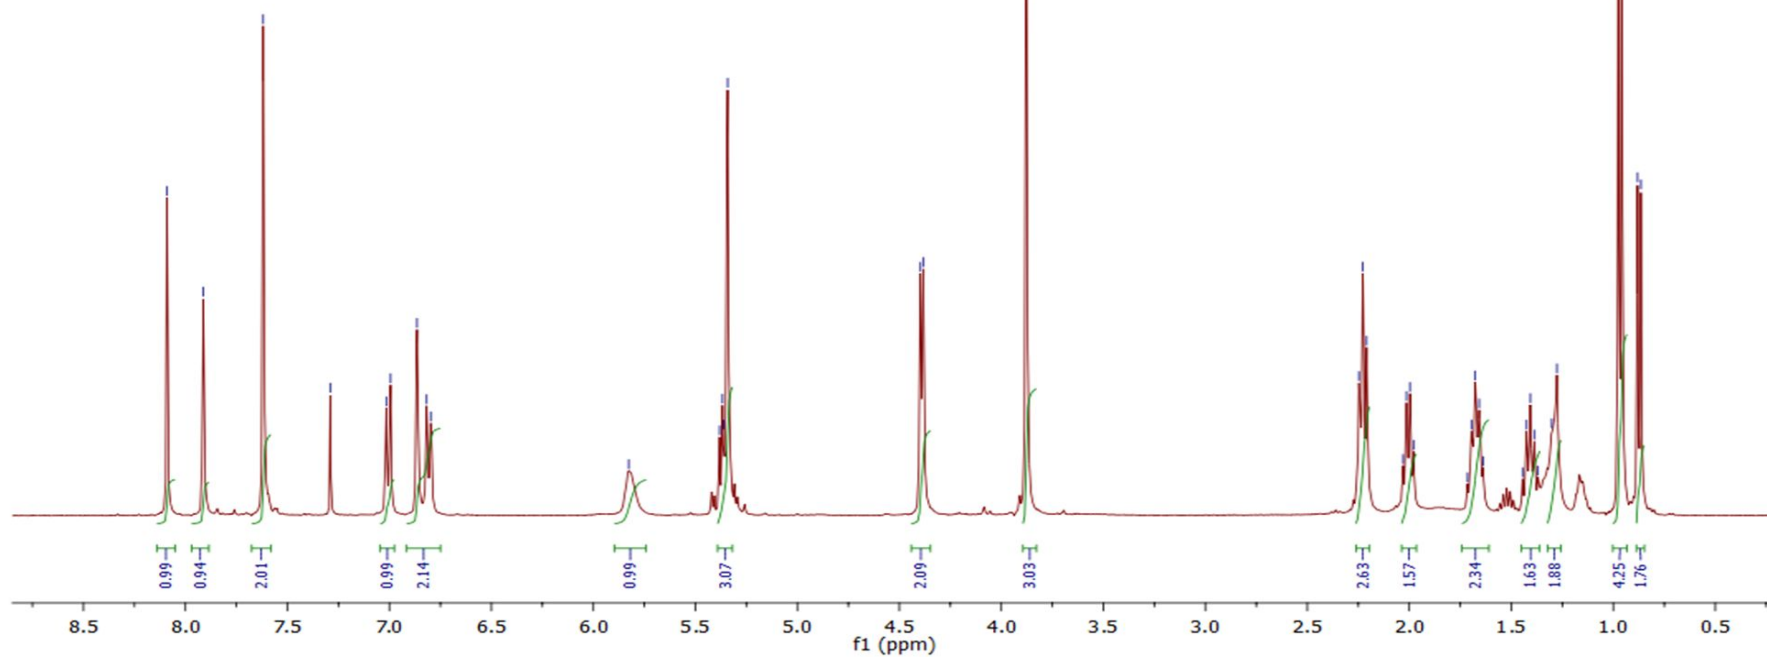

### <sup>13</sup>C-NMR

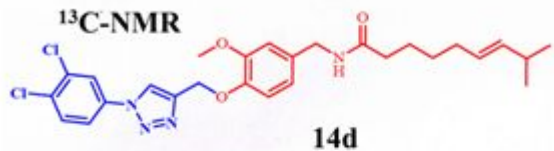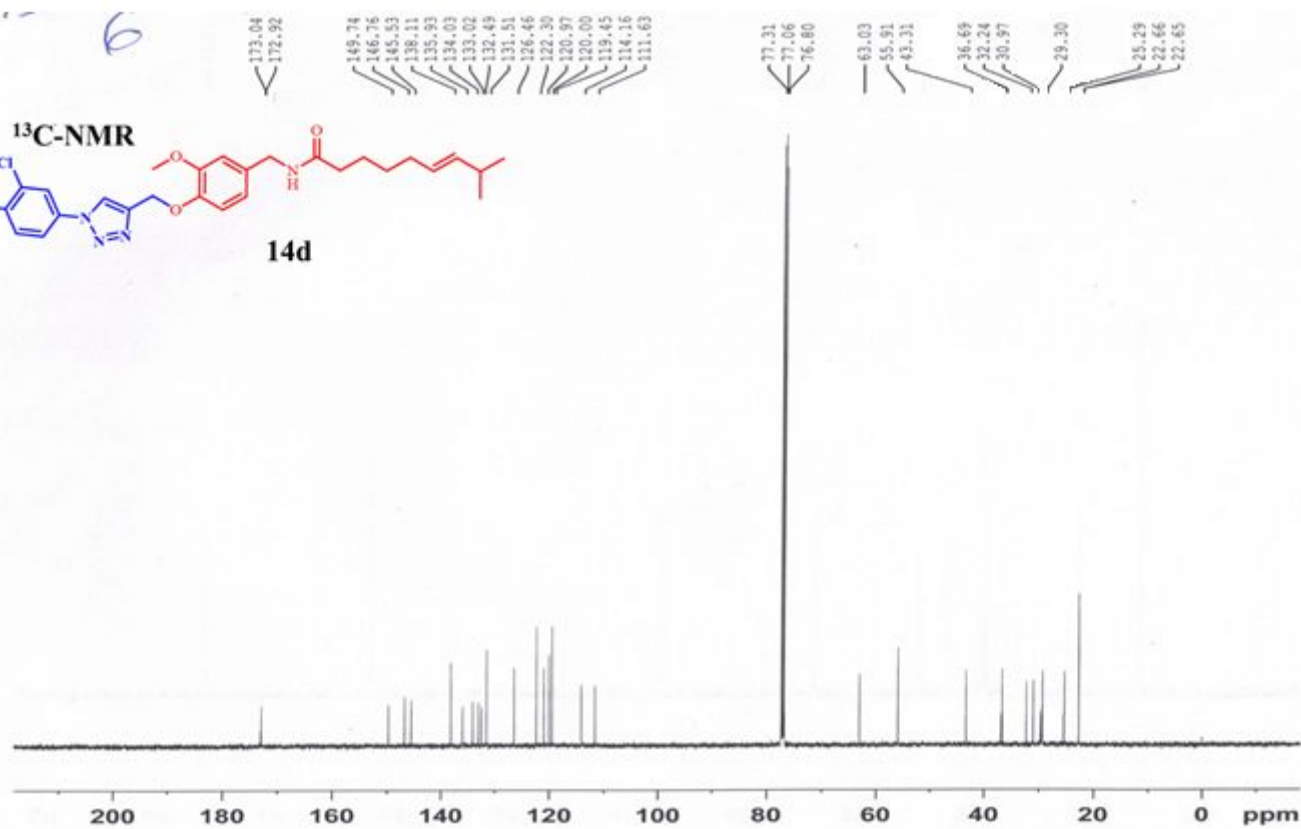

MS (ESI)  $m/z$ :  $[M+2]^+$  533.1

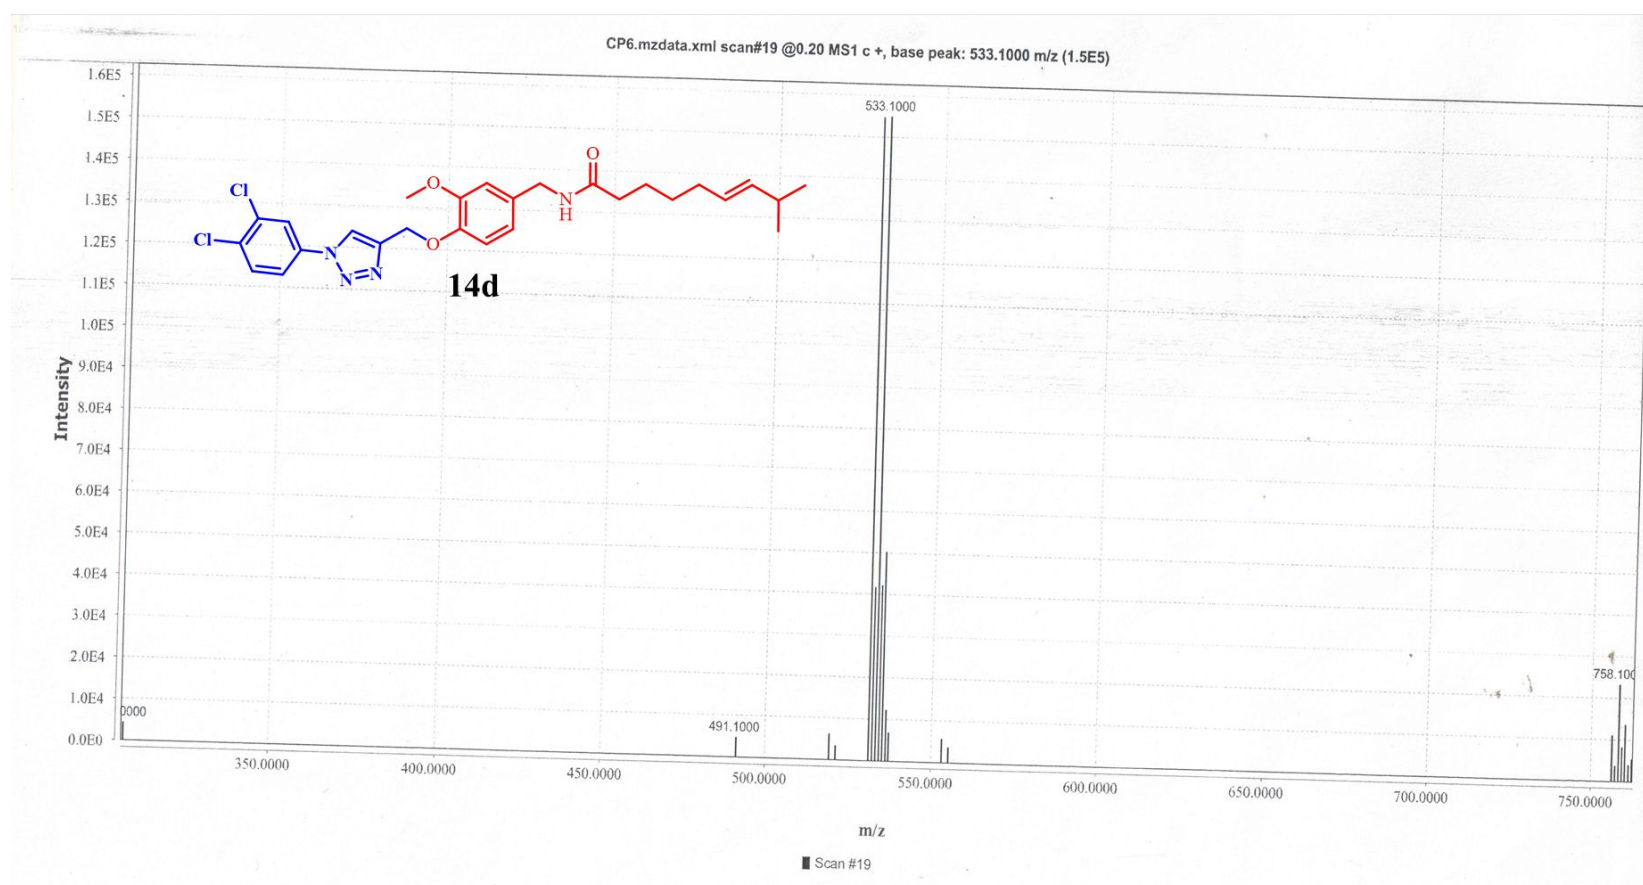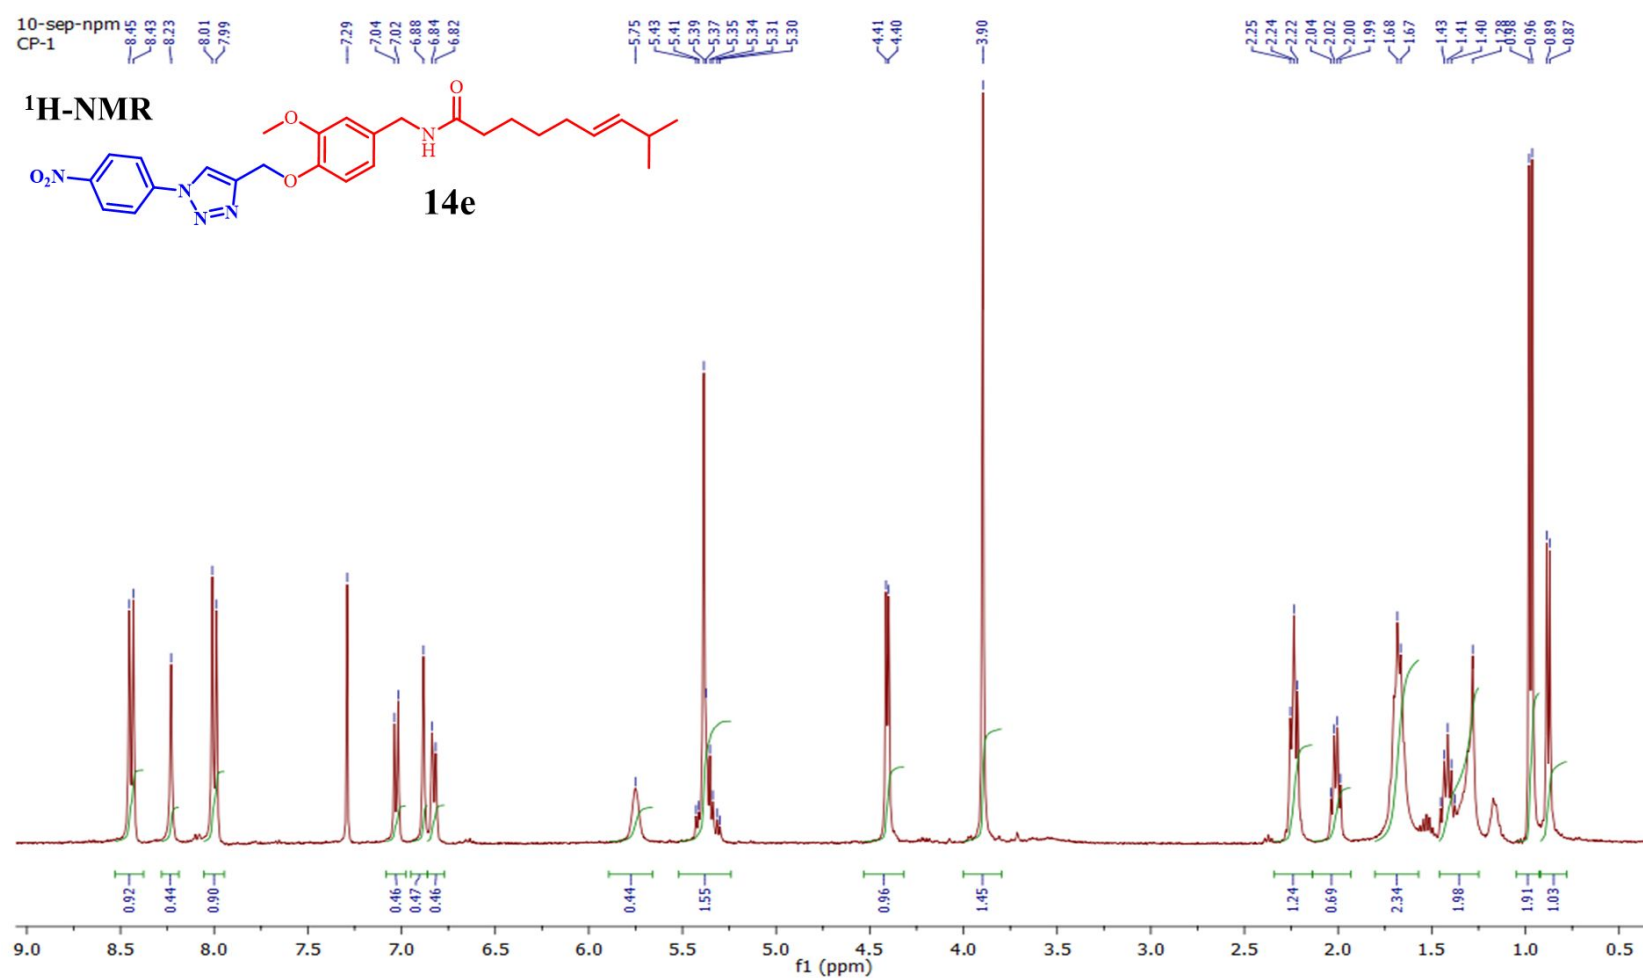

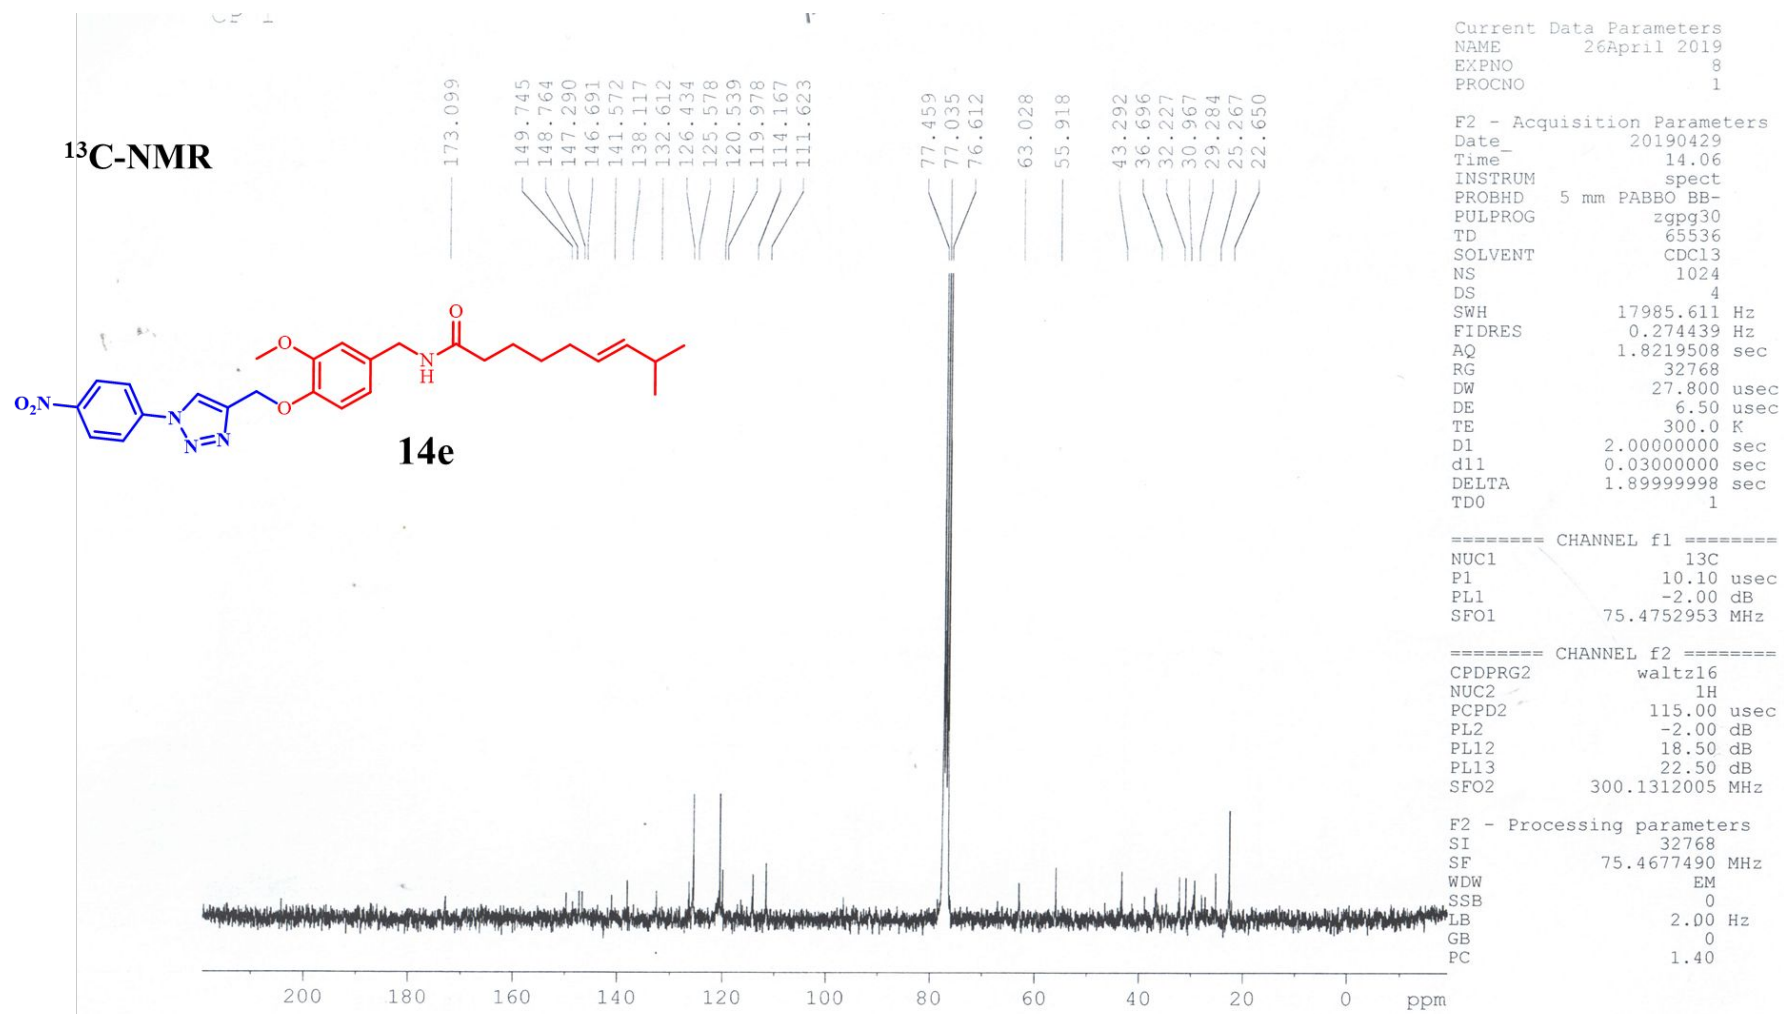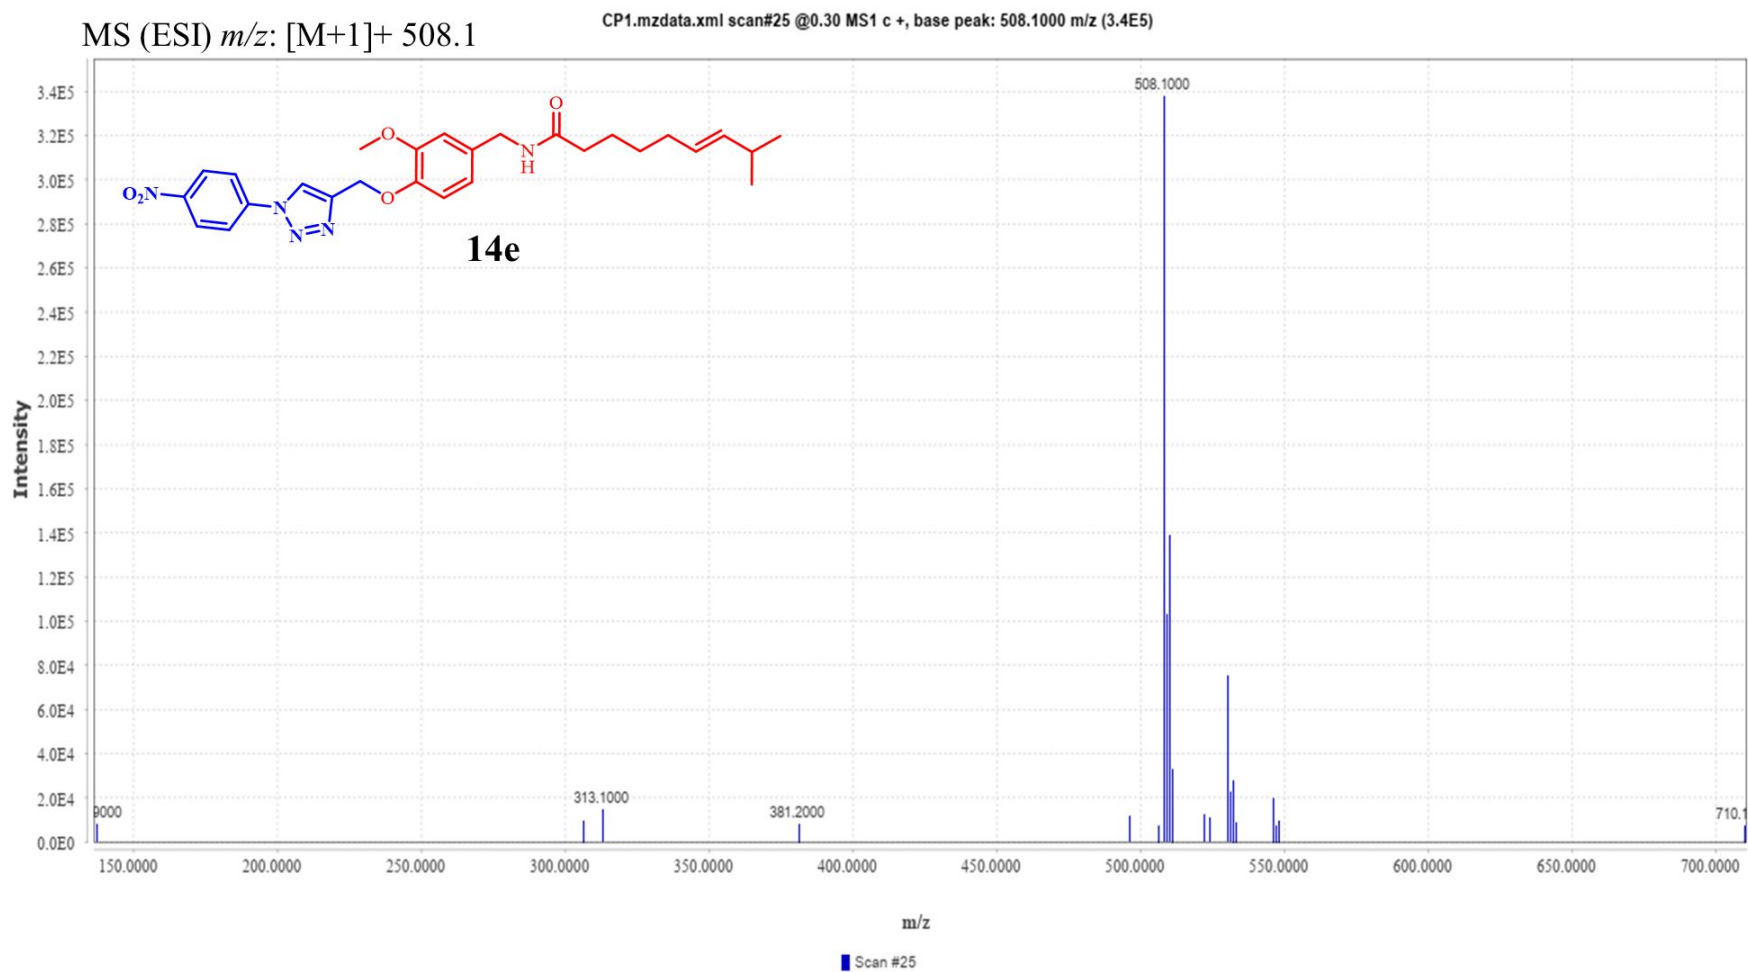

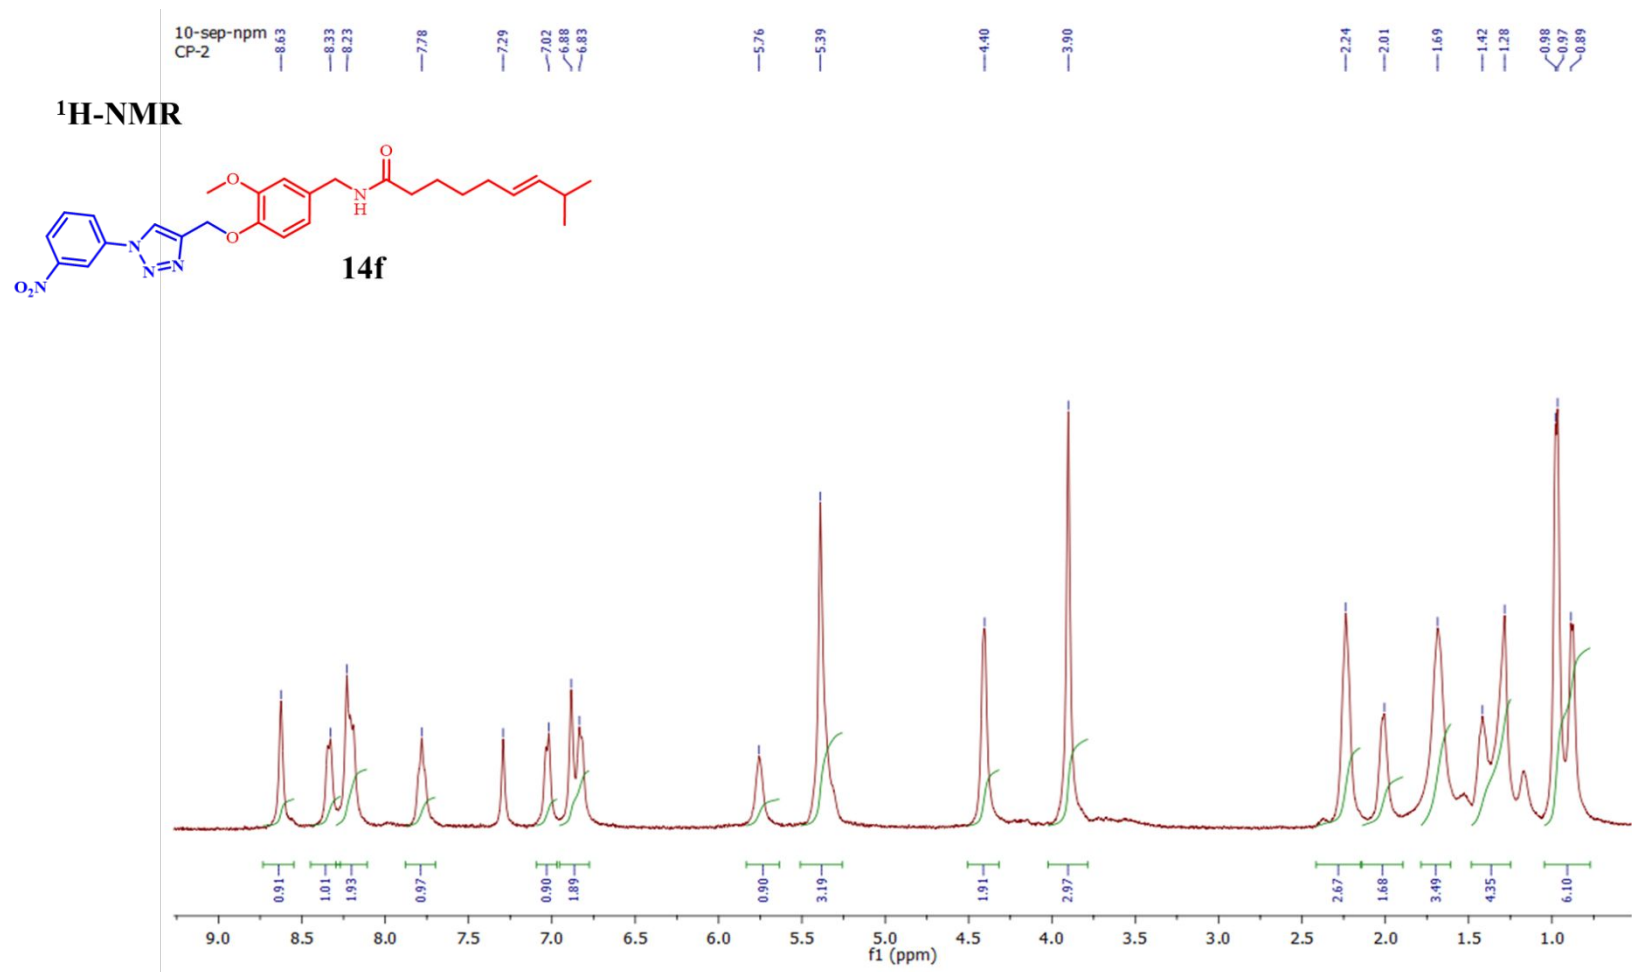

MS (ESI)  $m/z$ :  $[M+1]^+$  508.2

CP2.mzdata.xml scan#27 @0.40 MS1 c +, base peak: 508.2000  $m/z$  (4.5E5)

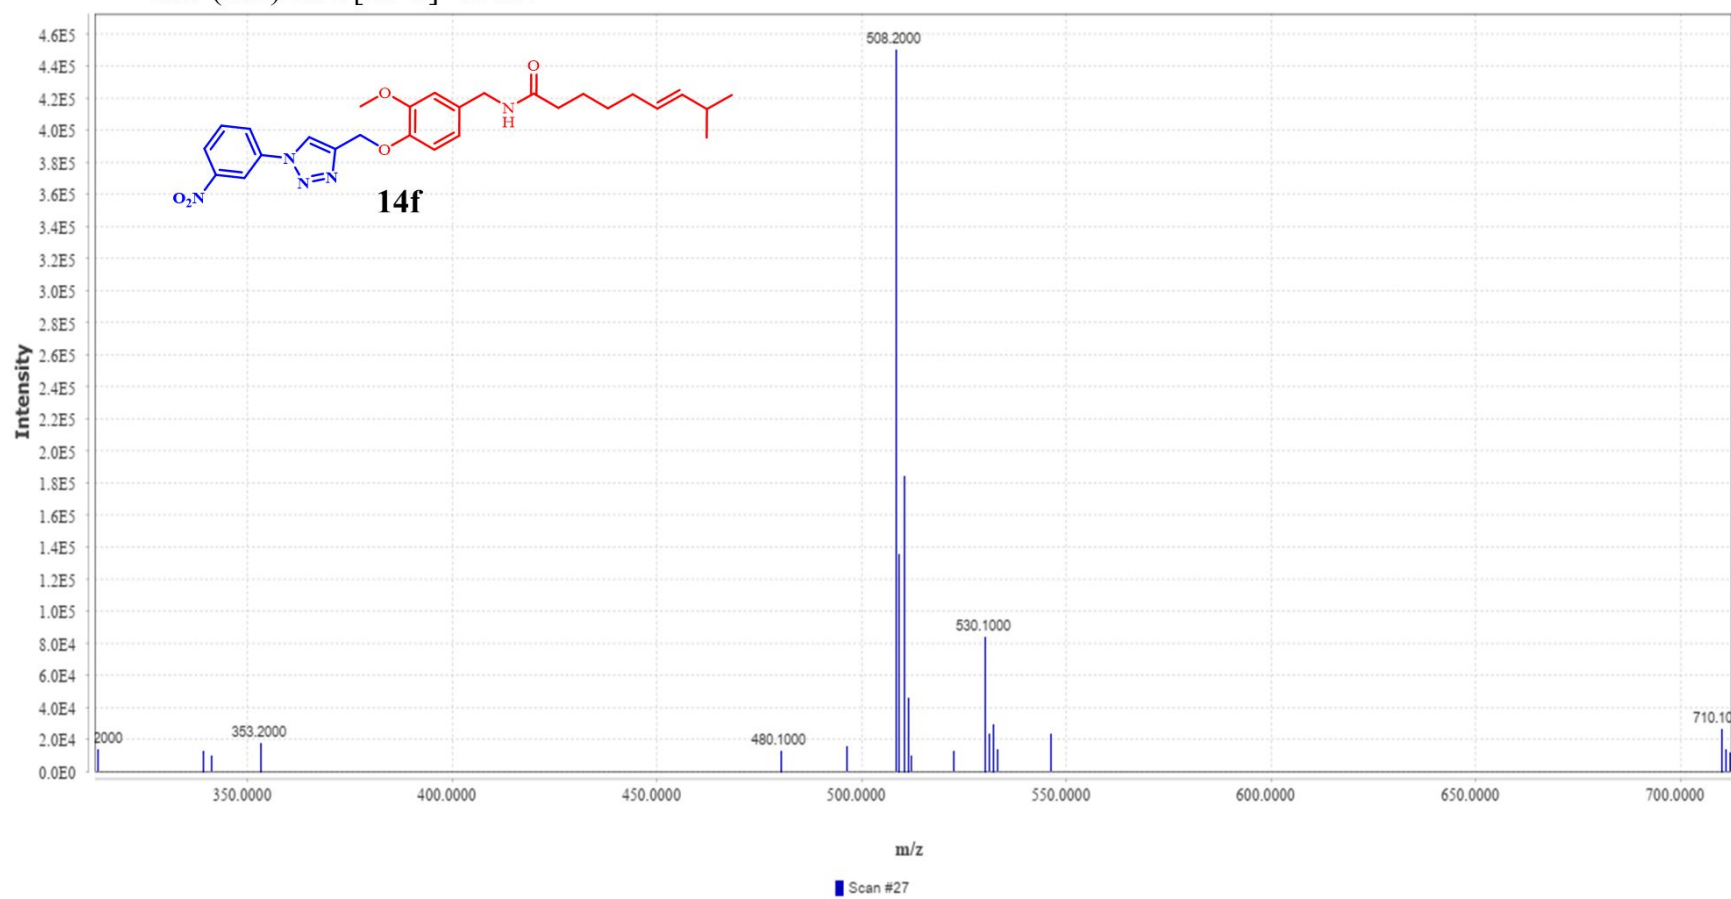

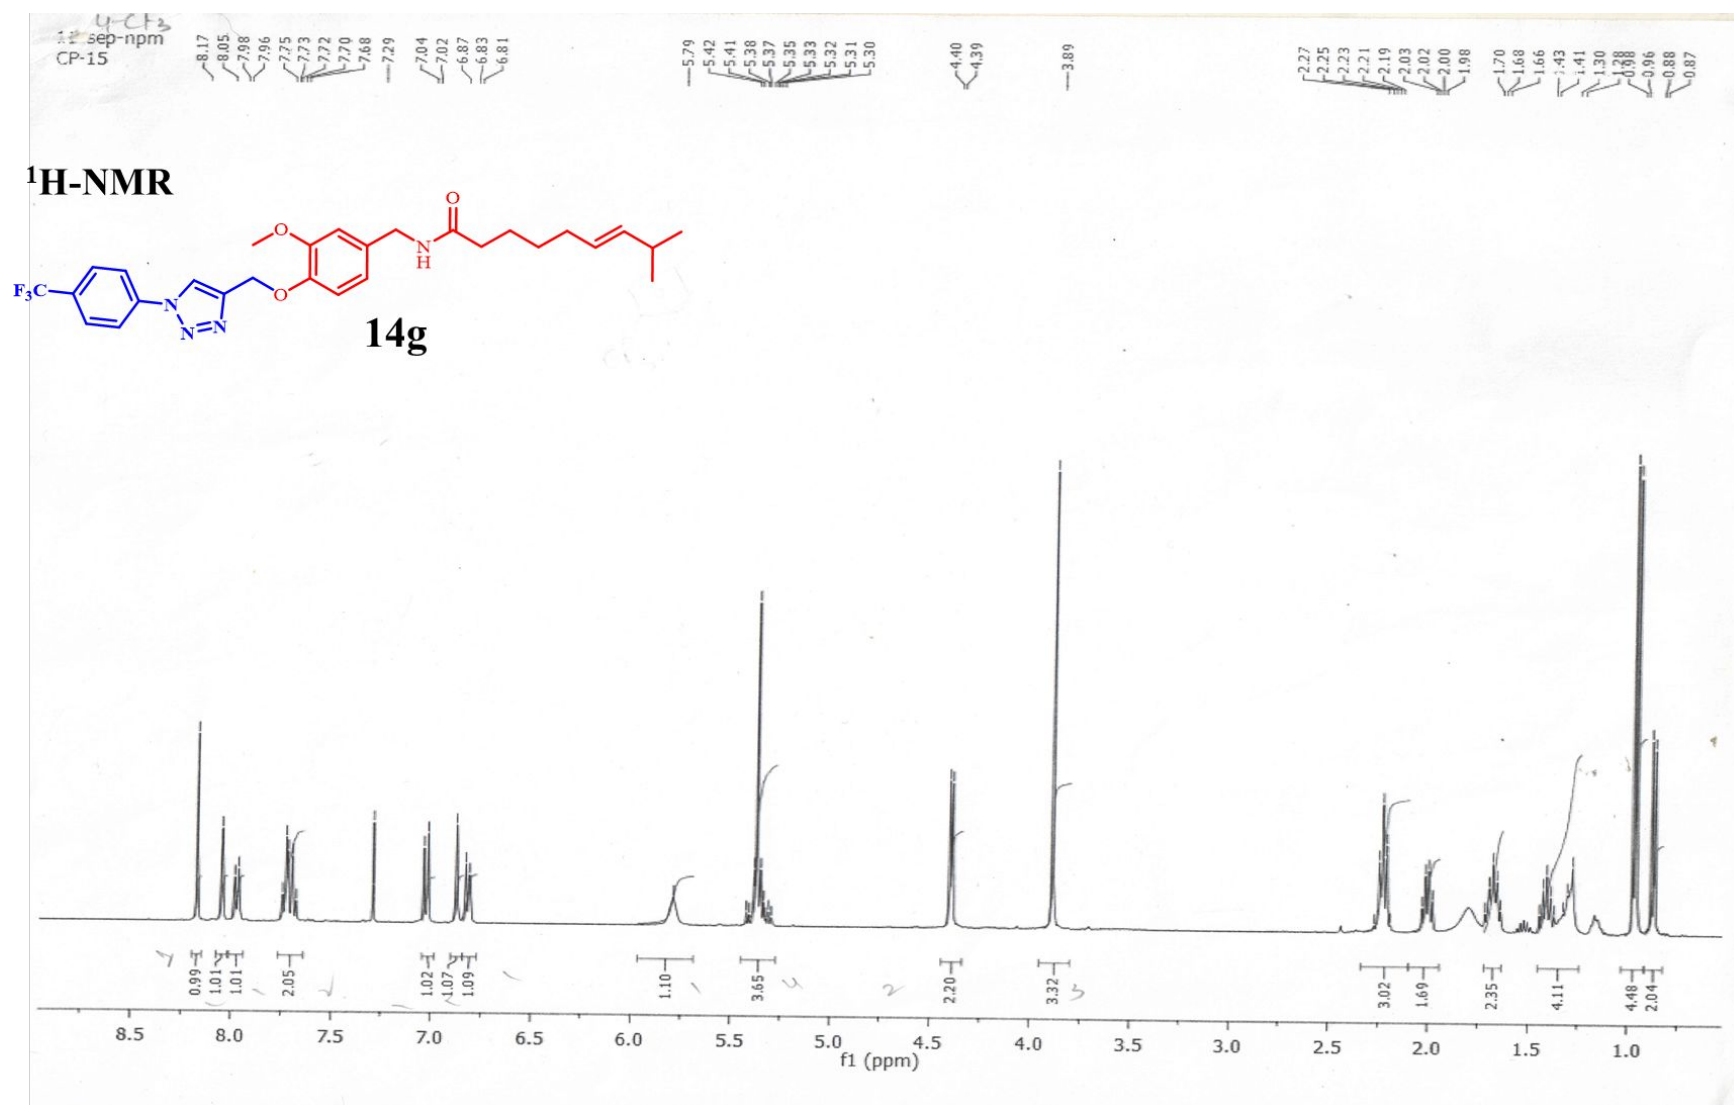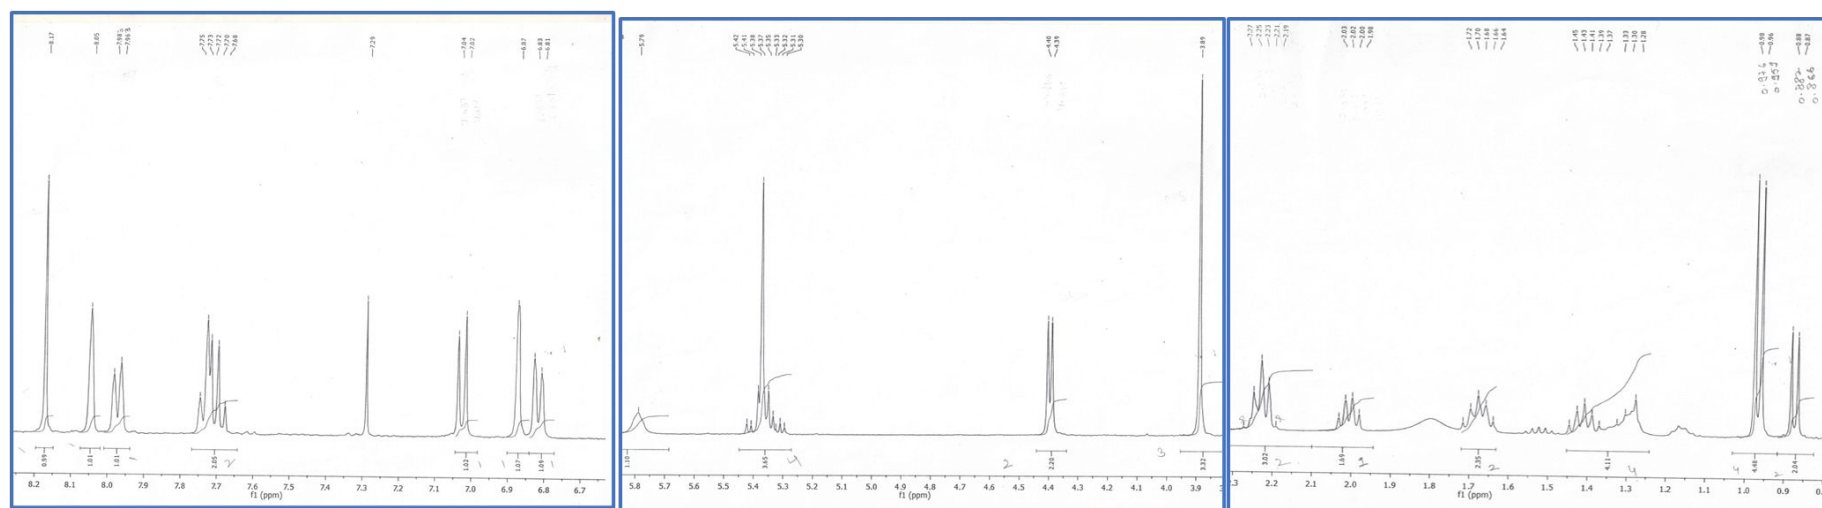

CP15

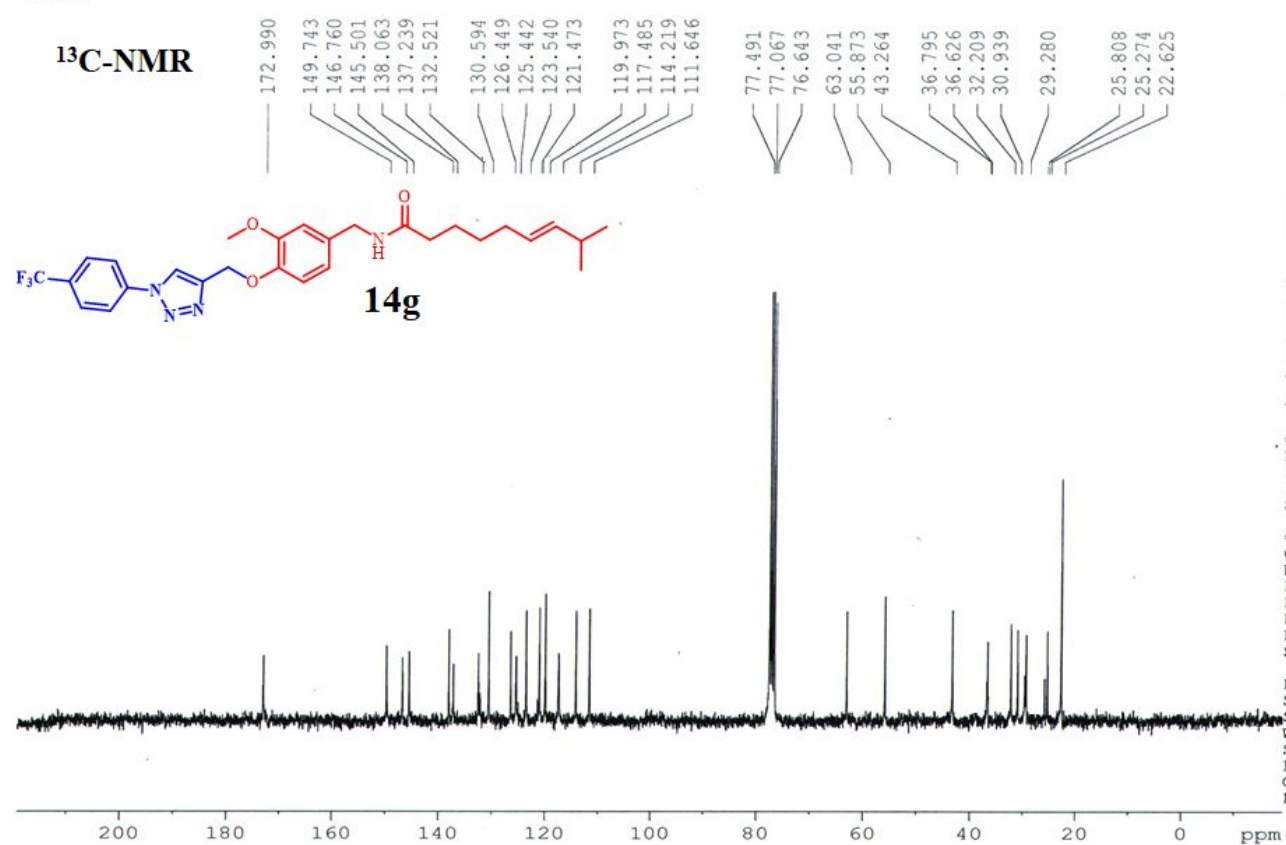MS (ESI)  $m/z$ :  $[M+1]^+$  531.1CP15.mzdata.xml scan#41 @0.50 MS1 c +, base peak: 531.1000  $m/z$  (1.0E5)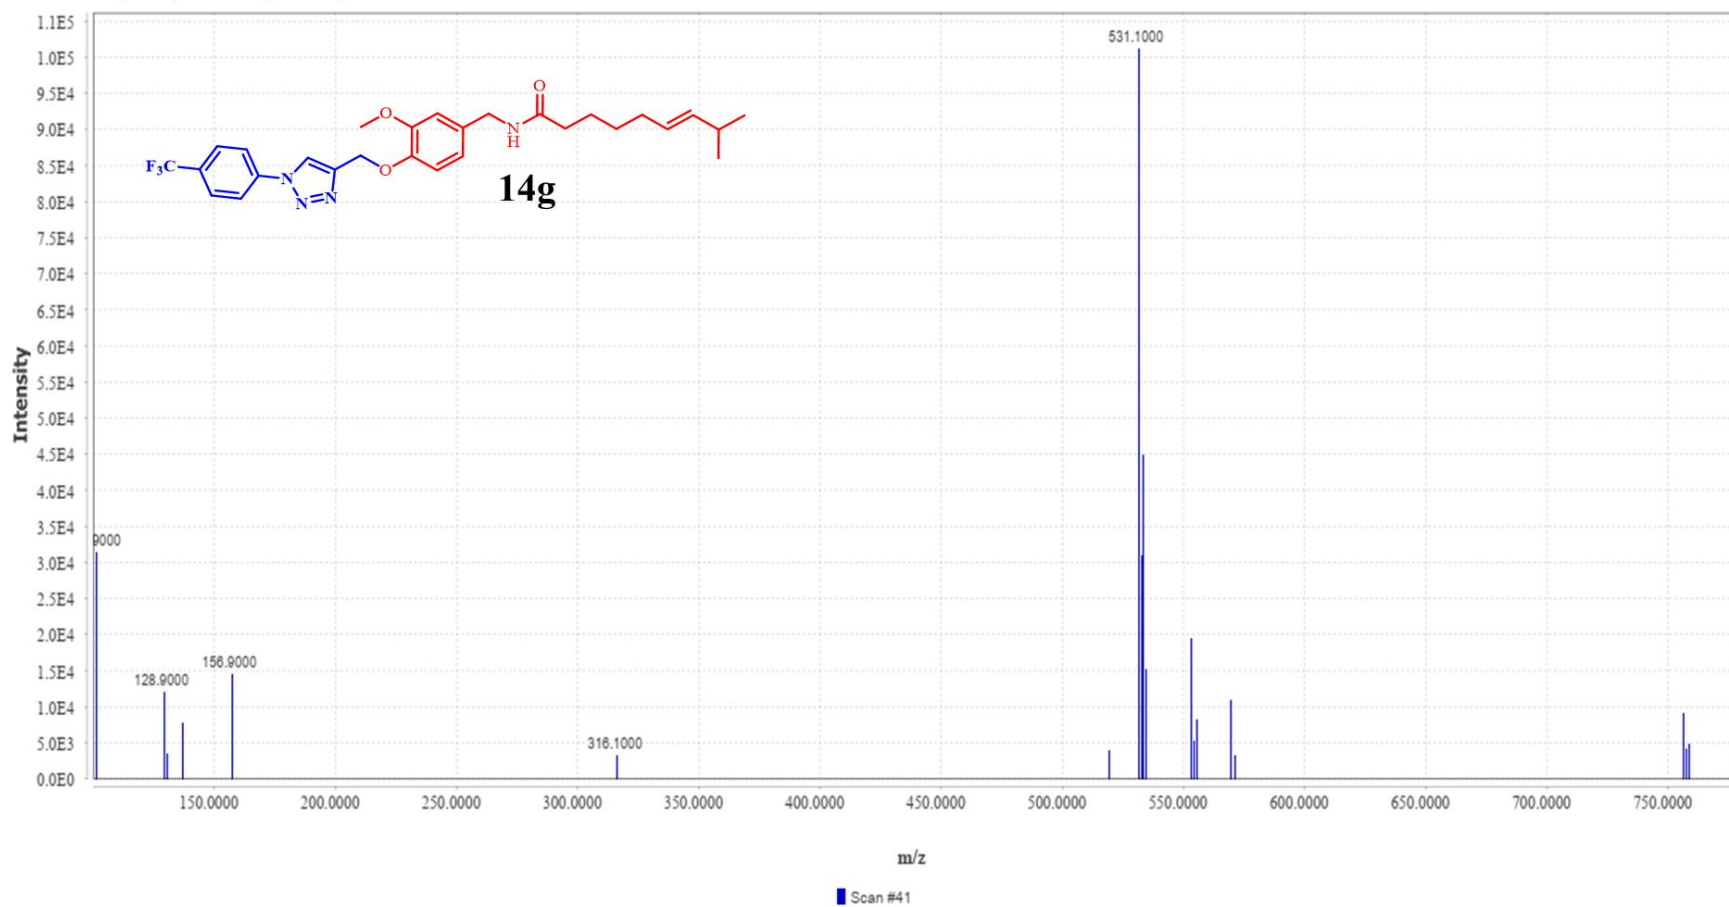

10-sep-npm  
CP-8

8.11  
7.79  
7.78  
7.76  
7.75  
7.34  
7.31  
7.29  
7.27  
7.10  
7.08  
7.04  
6.92  
6.88  
6.86  
5.83  
5.47  
5.46  
5.44  
5.41  
5.39  
5.36  
5.35  
4.45  
4.44  
3.93

2.30  
2.28  
2.26  
2.08  
2.07  
2.05  
2.03  
1.75  
1.73  
1.71  
1.69  
1.50  
1.48  
1.46  
1.44  
1.42  
1.33  
1.22  
1.03  
1.01  
0.93  
0.92

<sup>1</sup>H-NMR

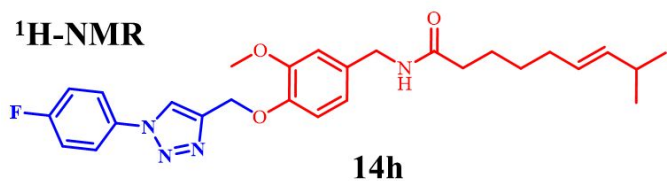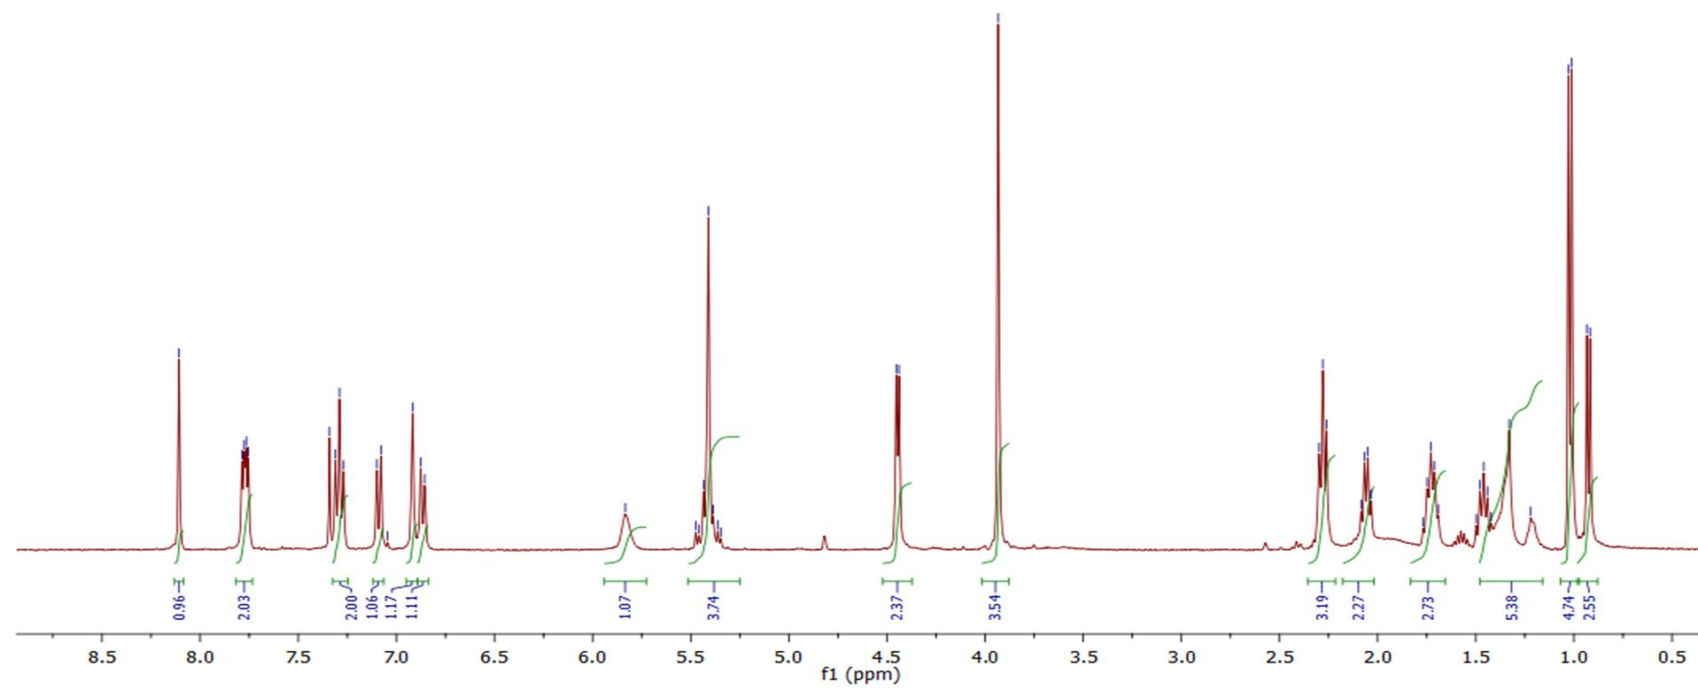

<sup>13</sup>C-NMR

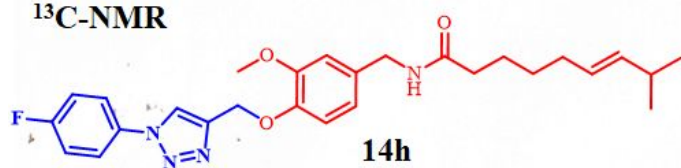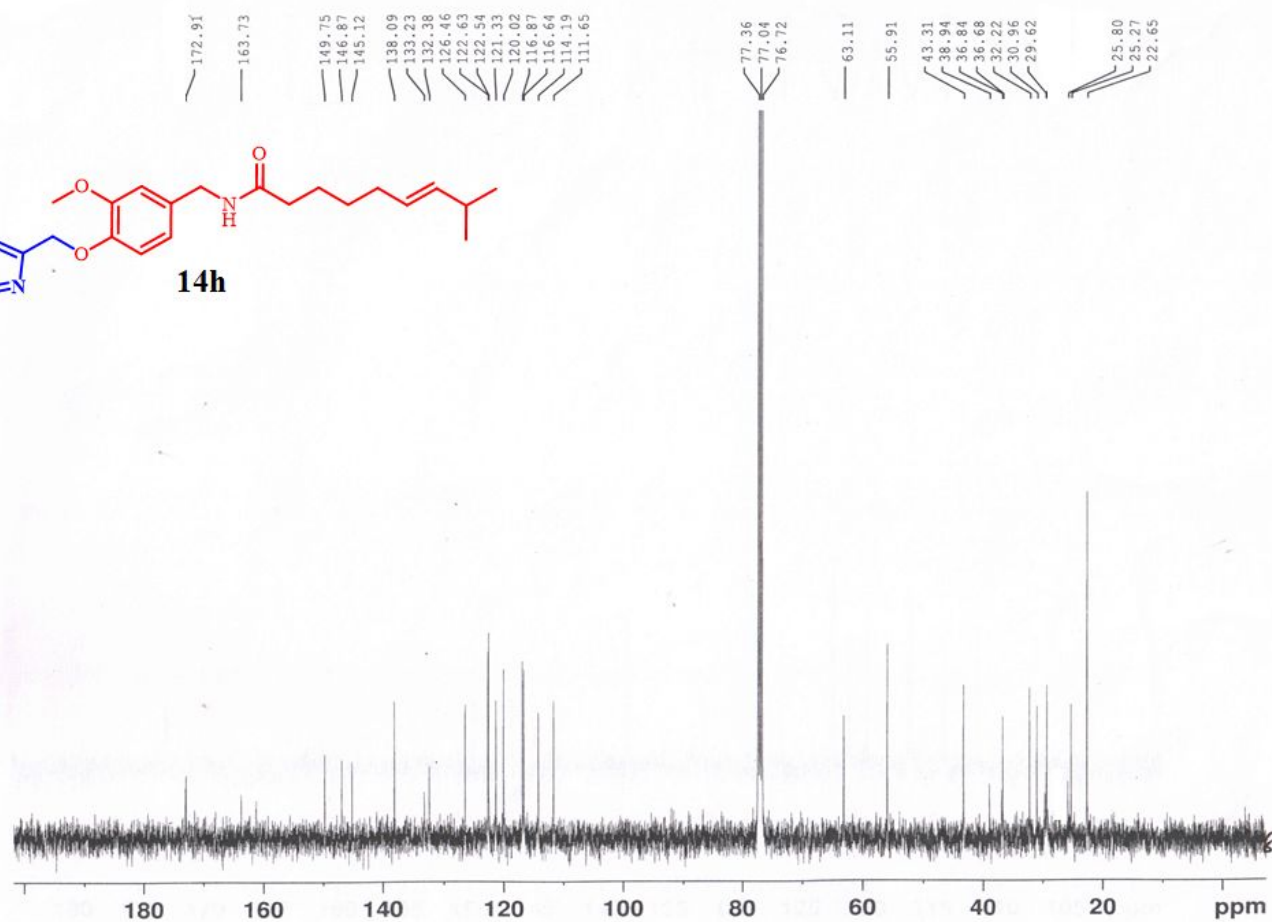

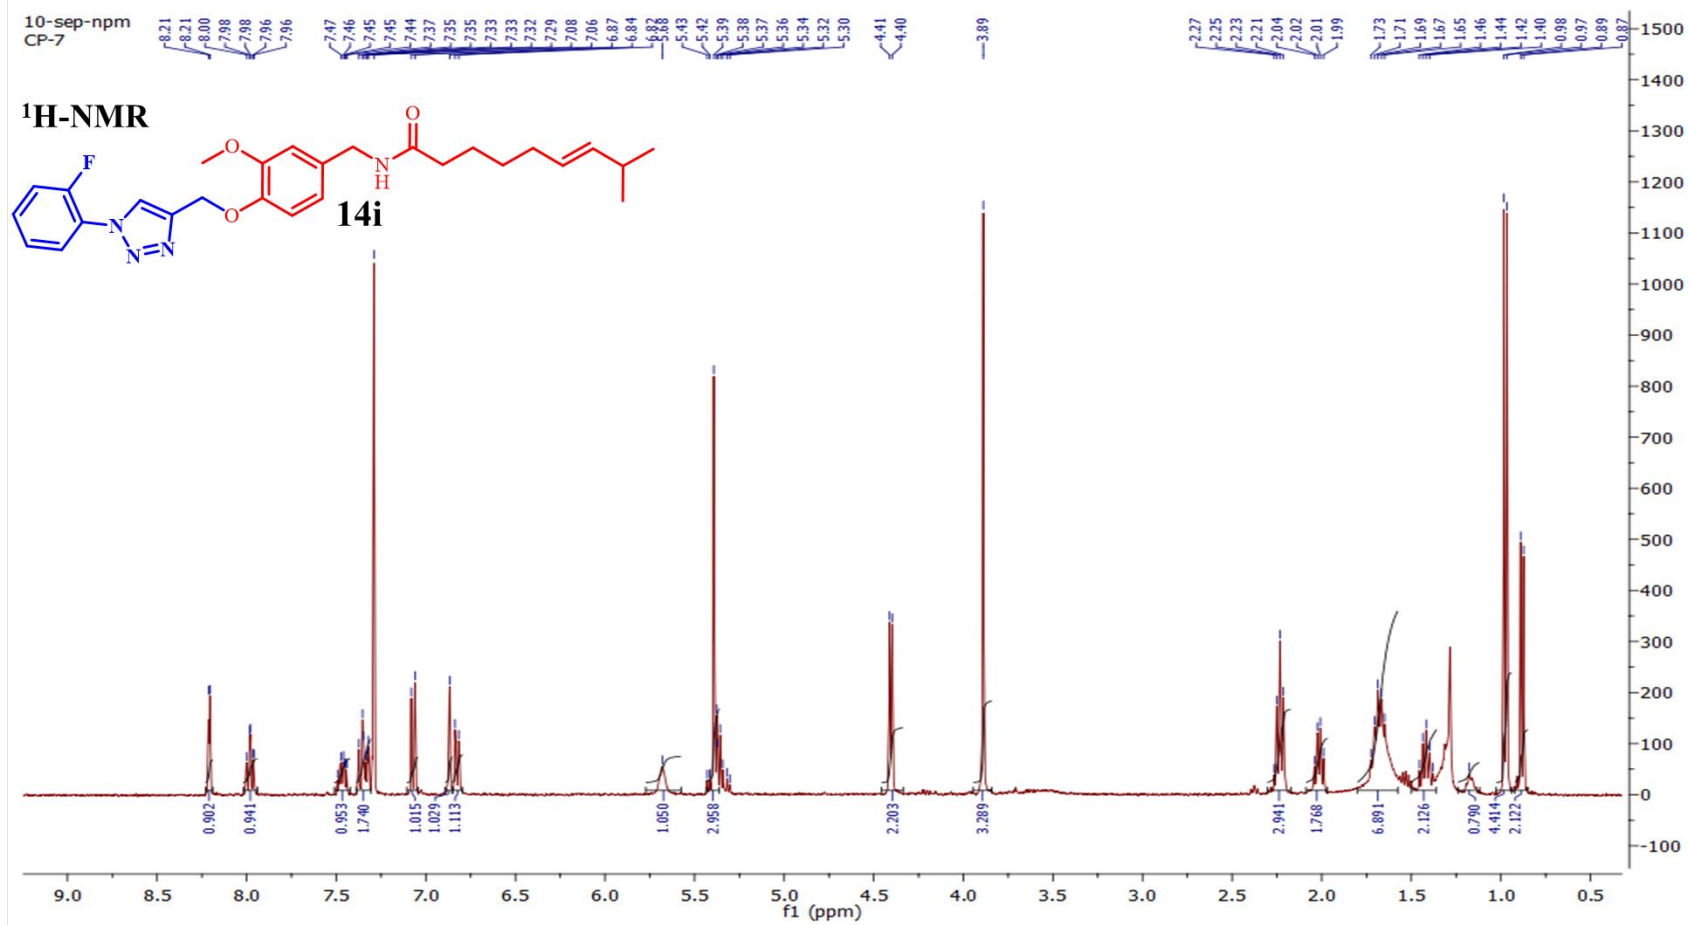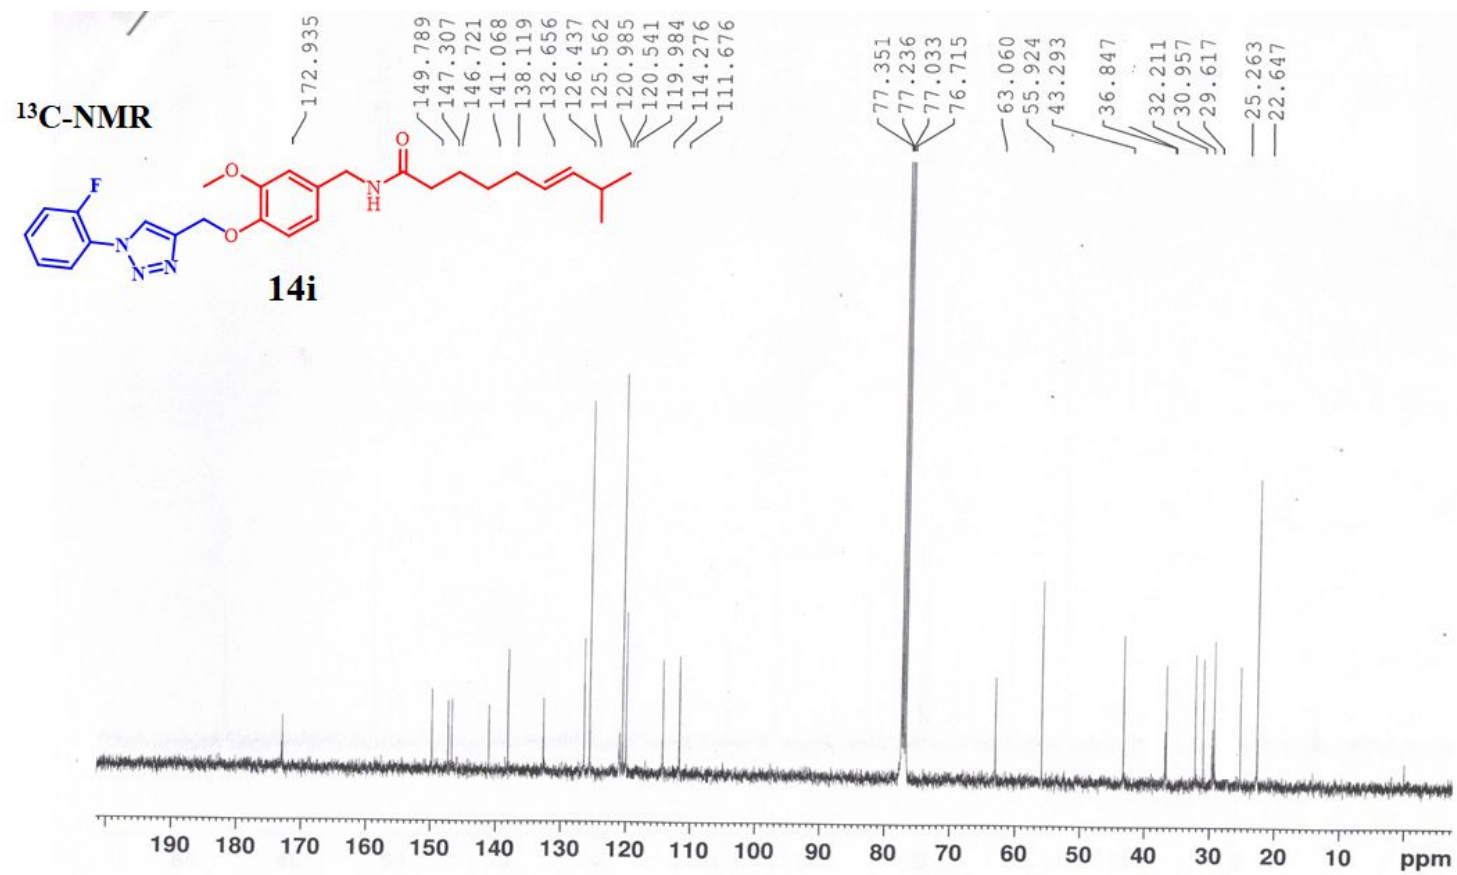



MS (ESI)  $m/z$ :  $[M+1]^+$  481.1

CP7.mzdata.xml scan#31 @0.40 MS1 c +, base peak: 481.1000 m/z (7.8E5)

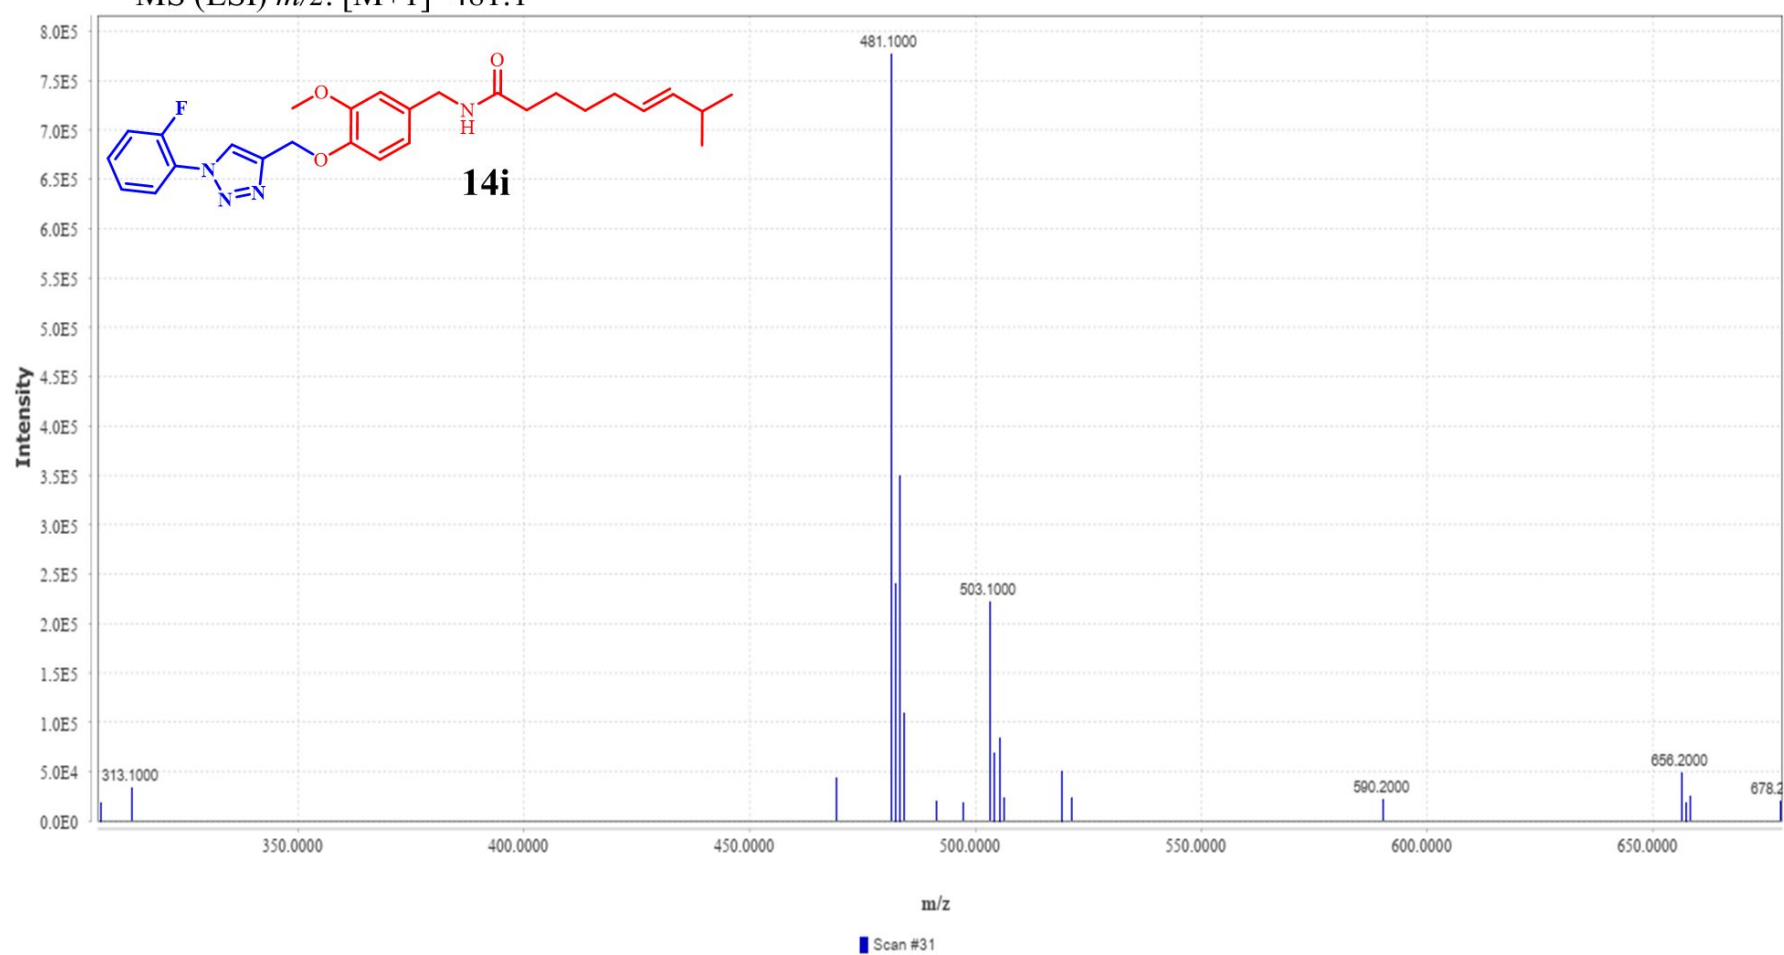

$^1\text{H-NMR}$

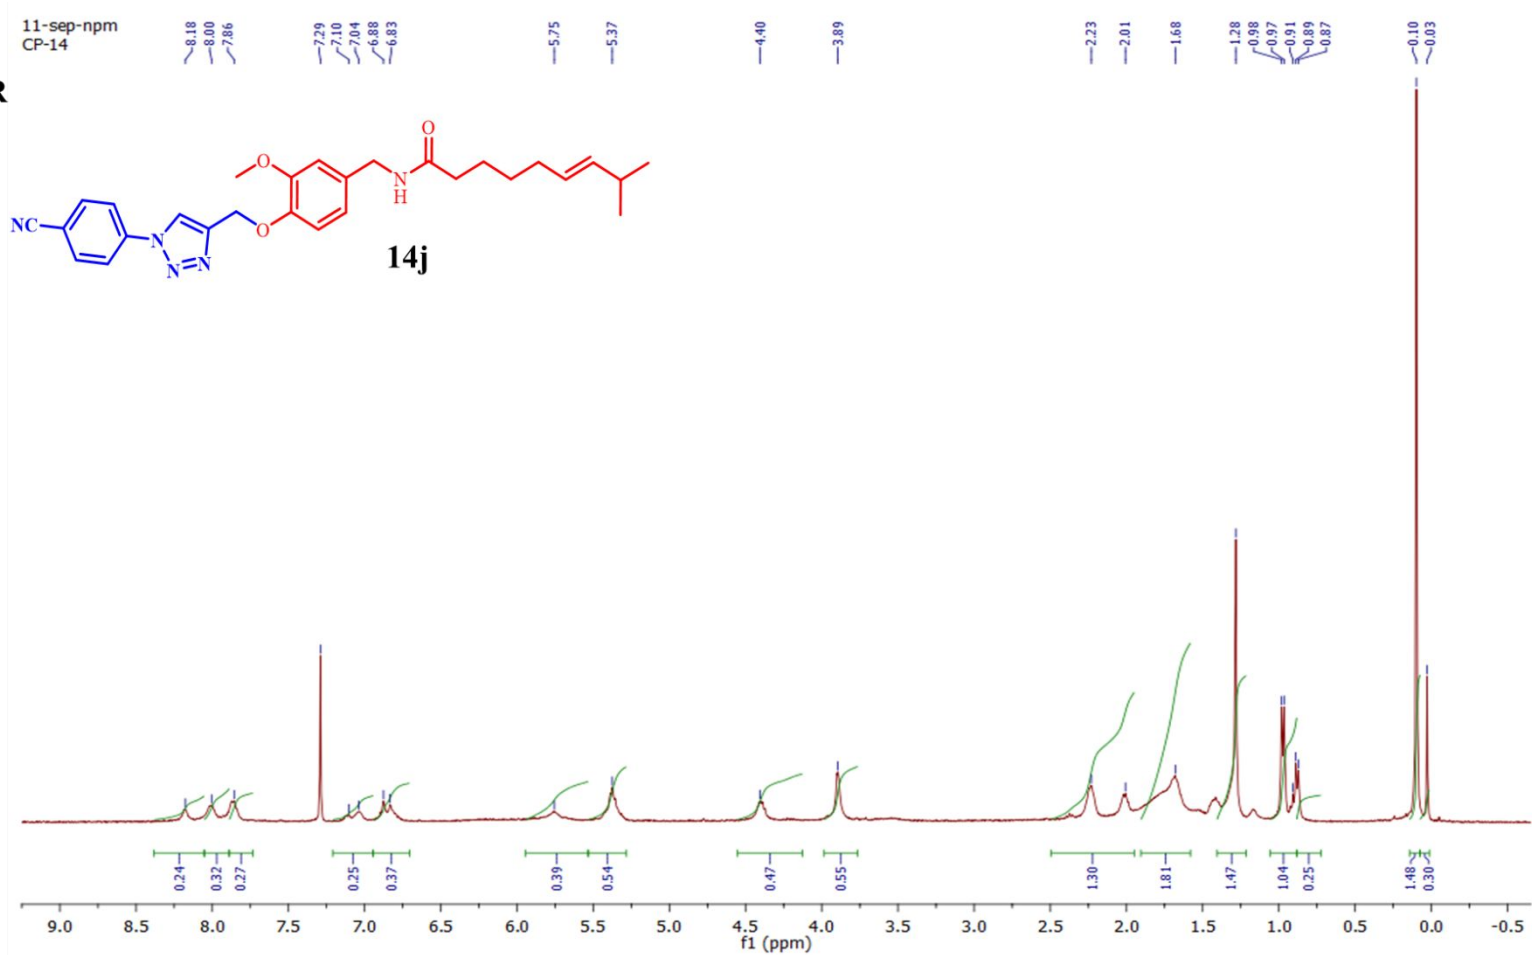

11-sep-npm  
CP-16

<sup>1</sup>H-NMR

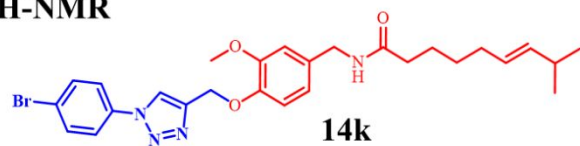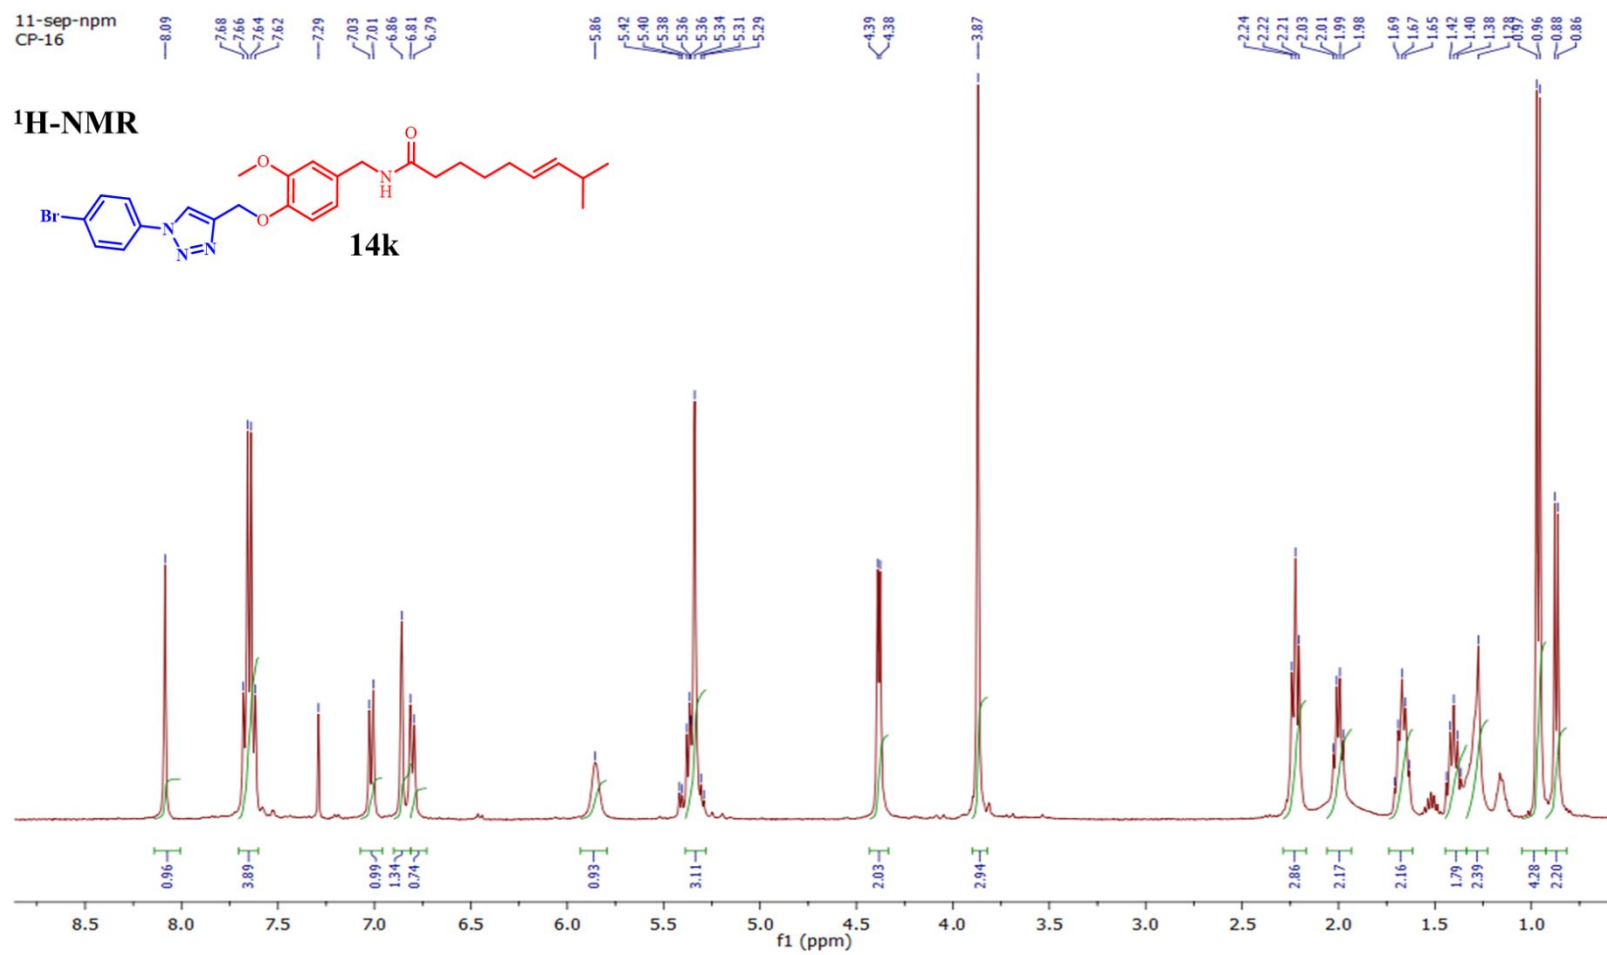

<sup>13</sup>C-NMR

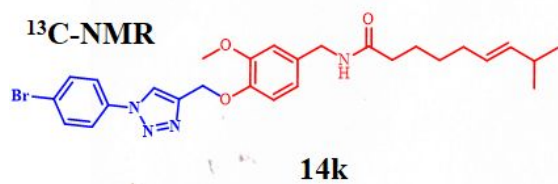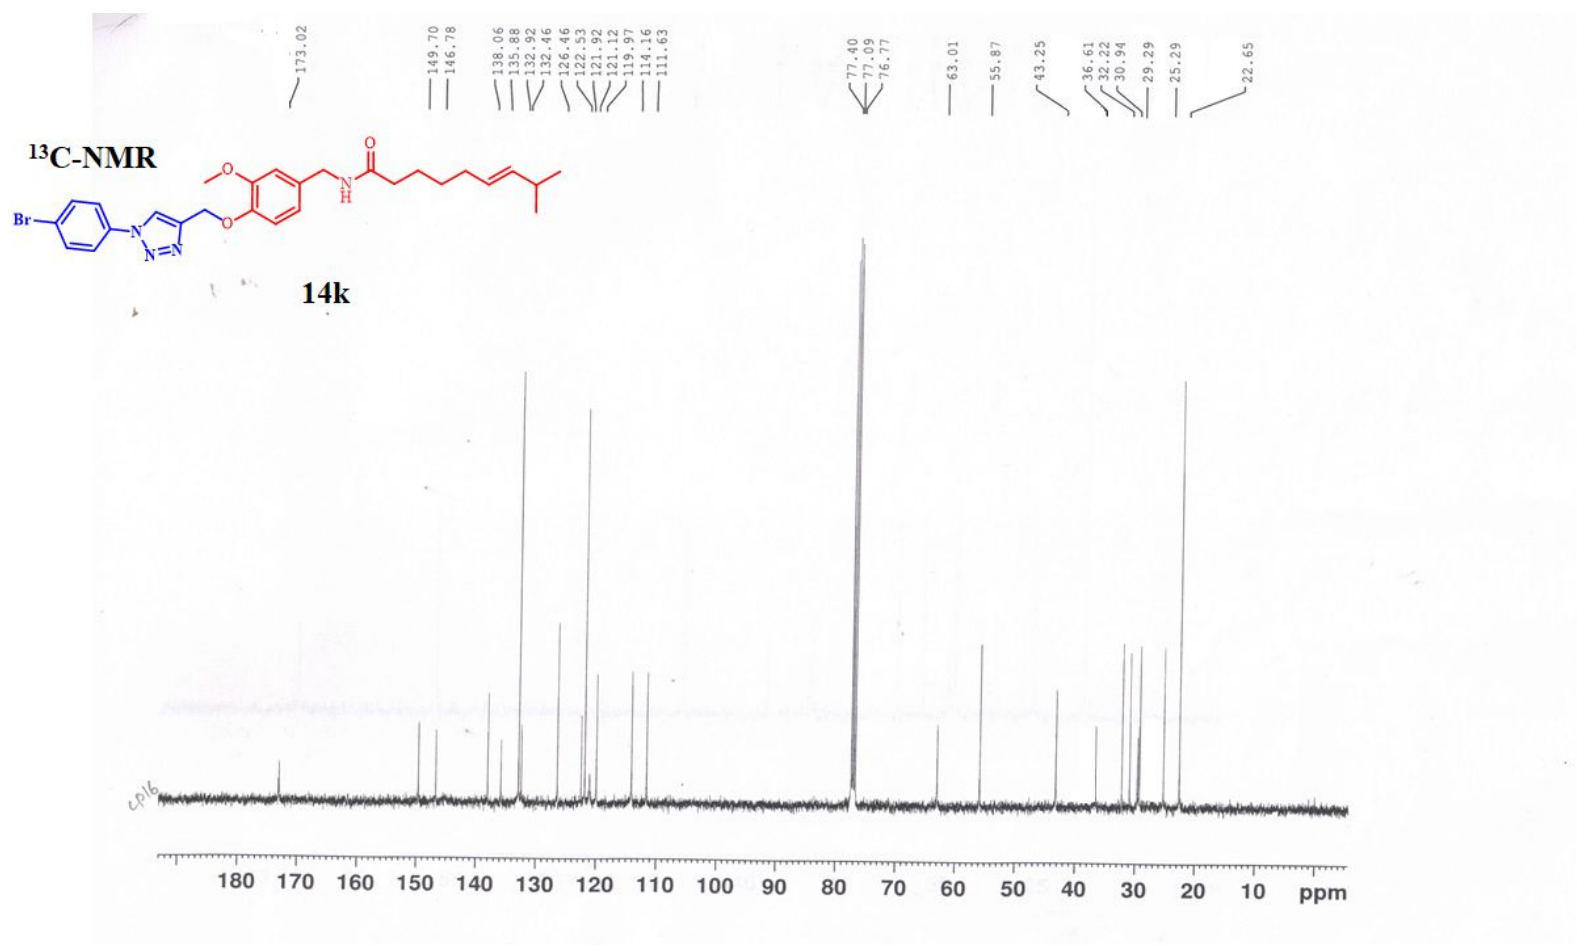



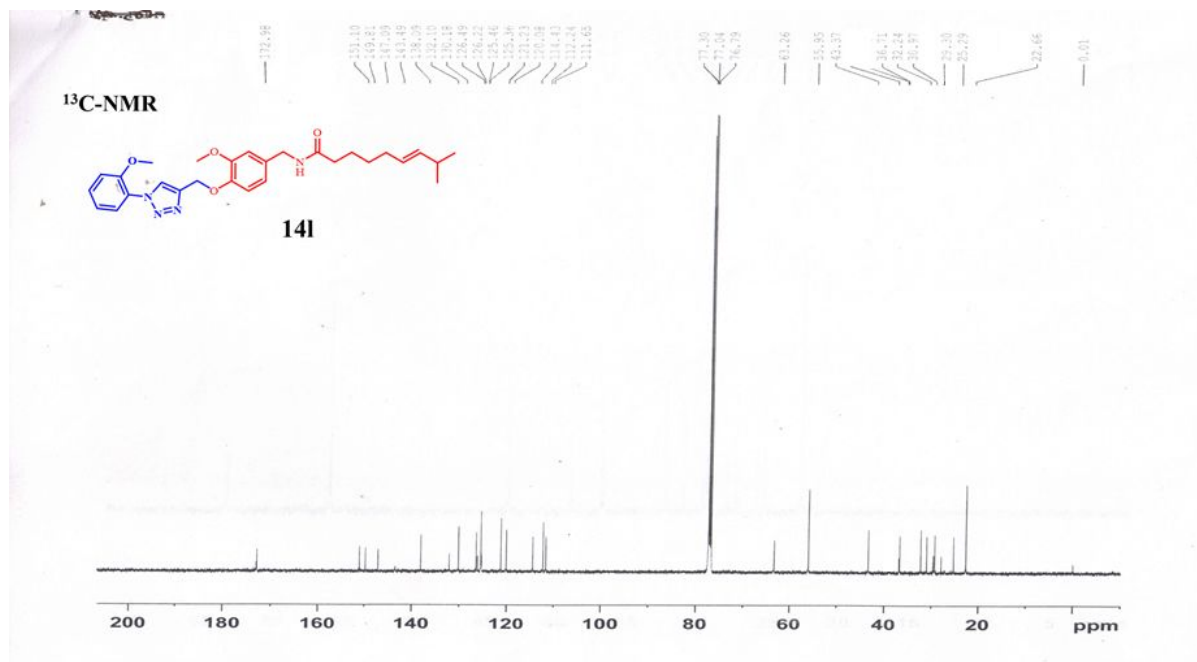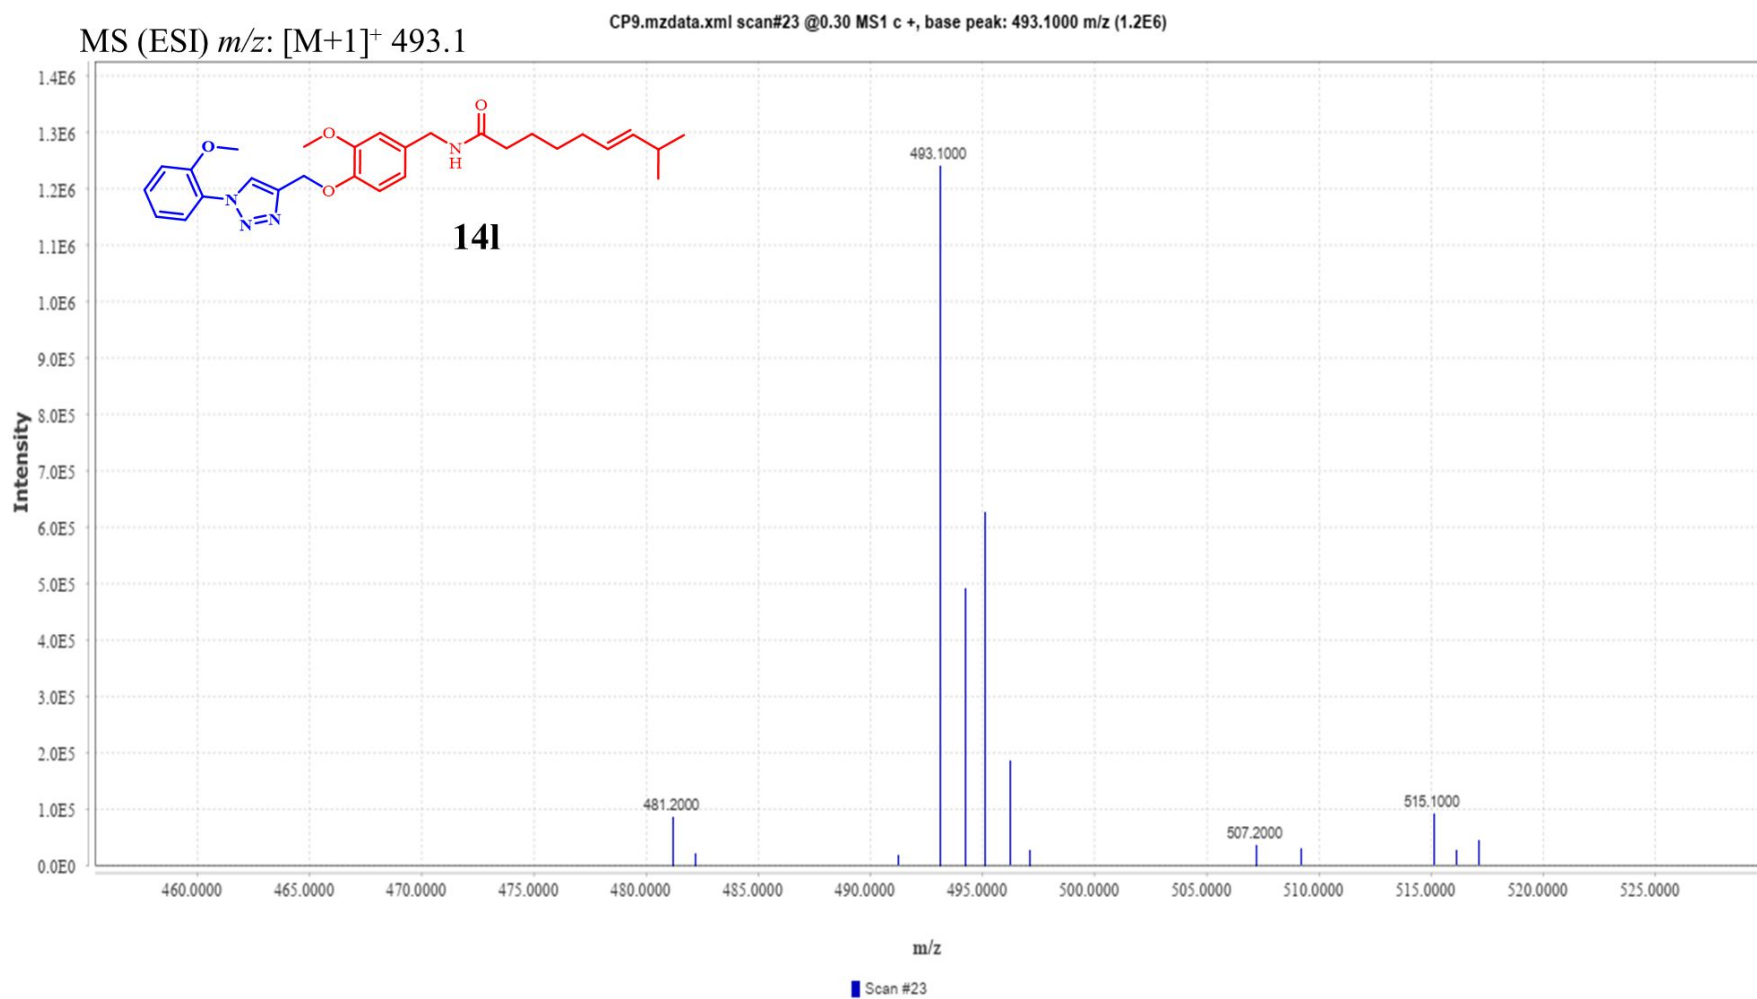

11-sep-npm  
CP-10

<sup>1</sup>H-NMR

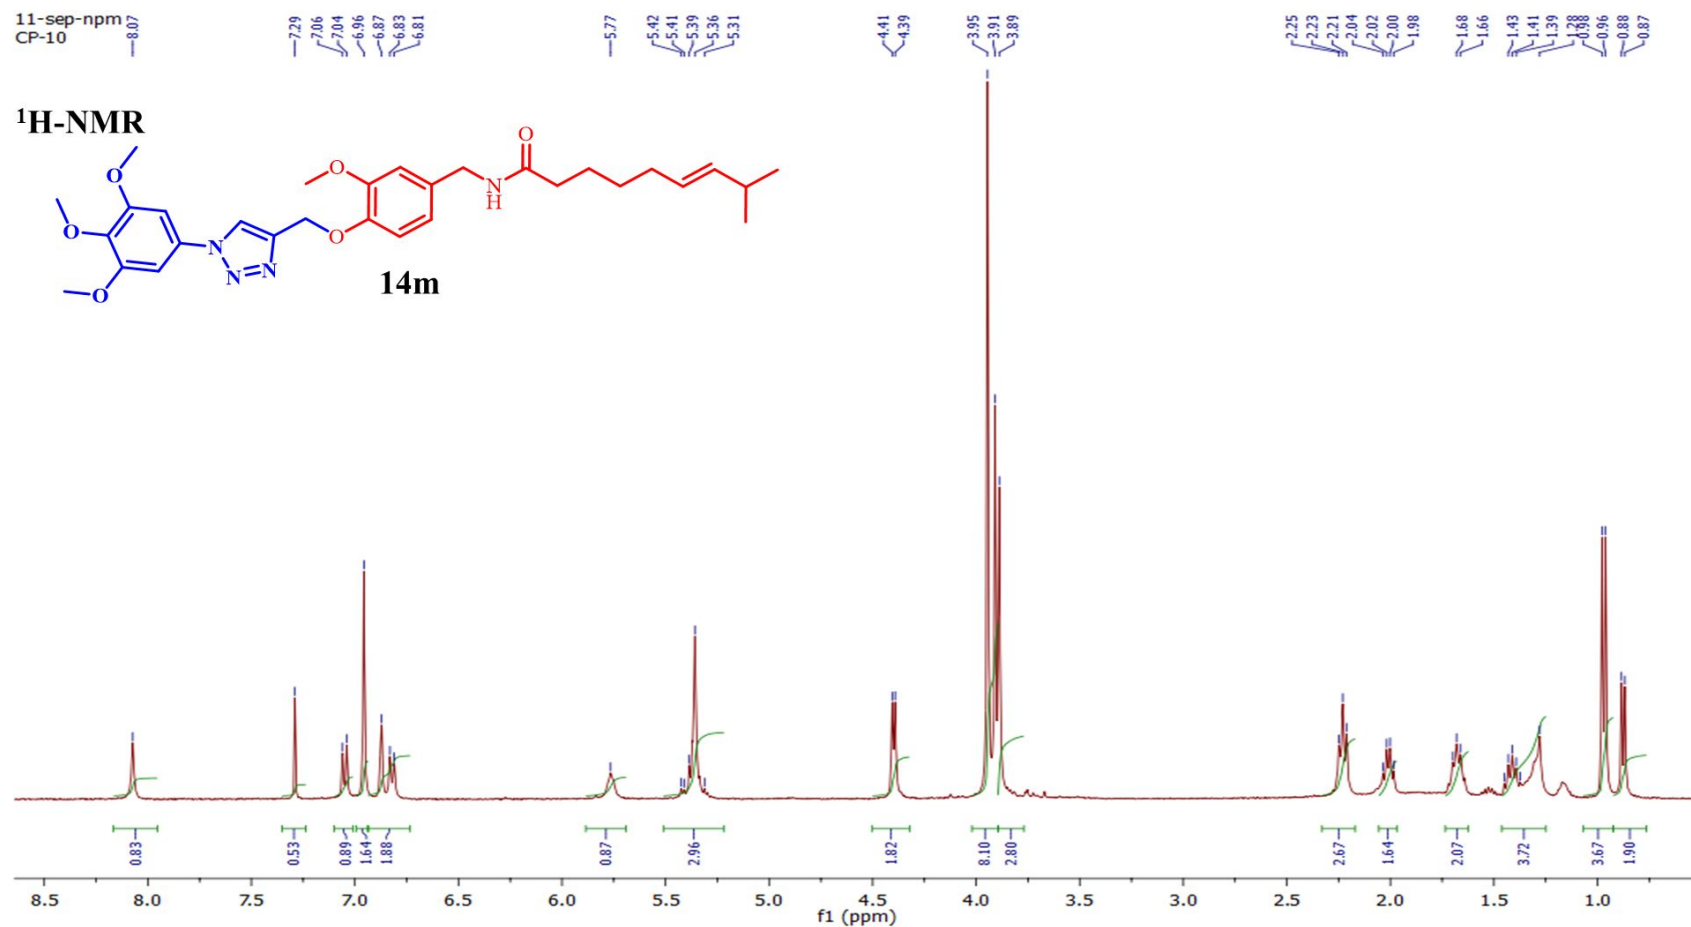

<sup>13</sup>C-NMR

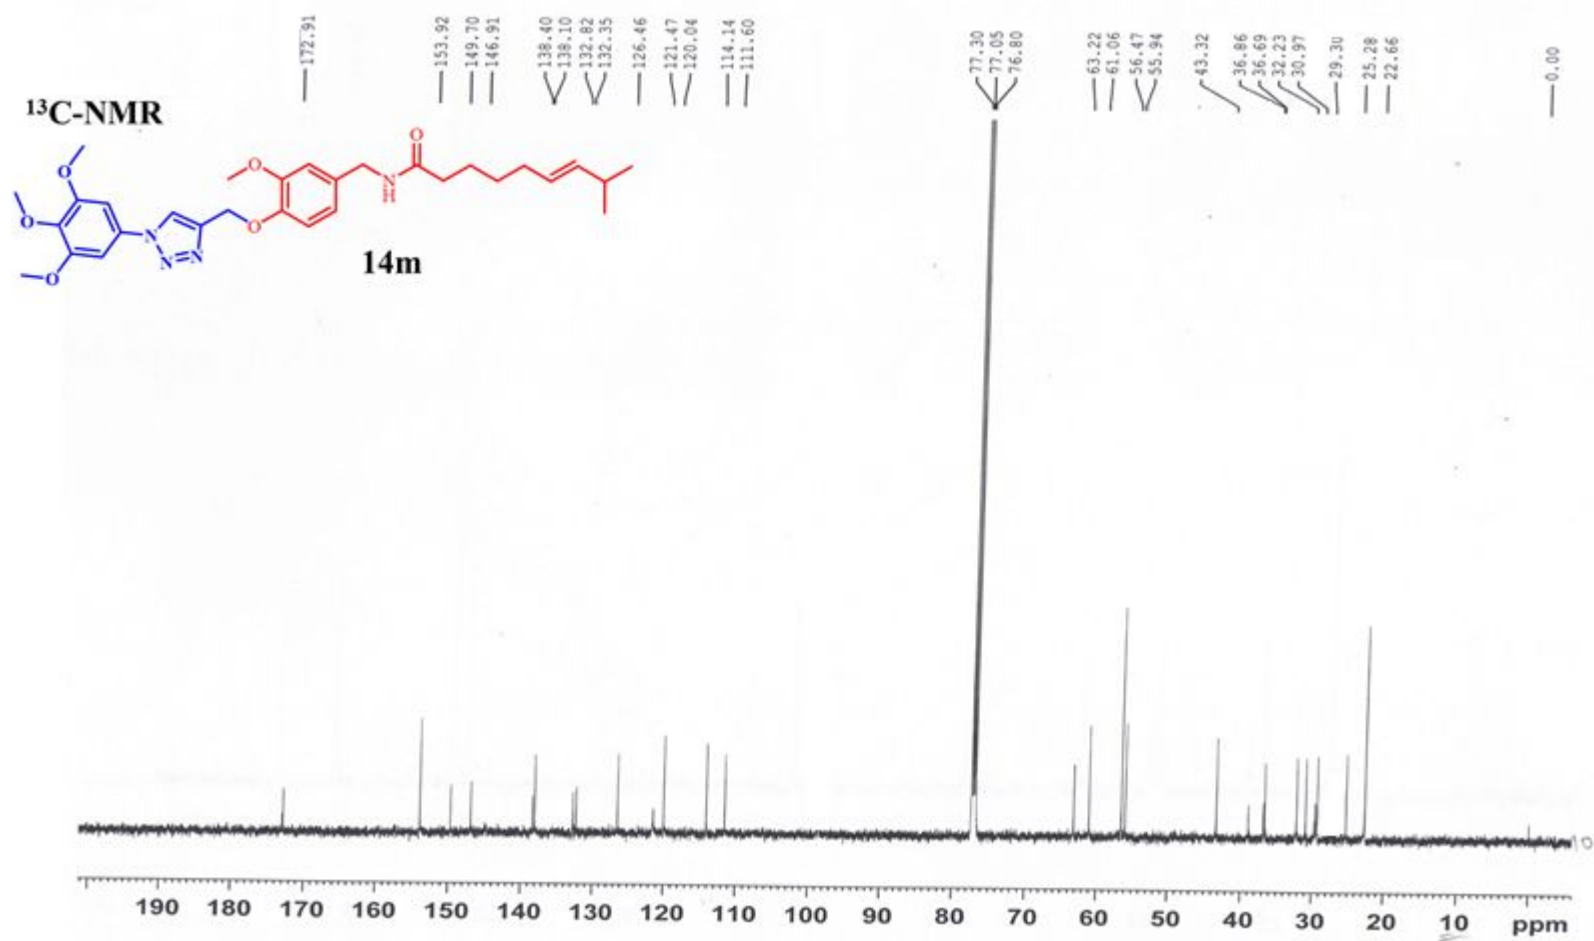

MS (ESI)  $m/z$ :  $[M+1]^+$  553.1

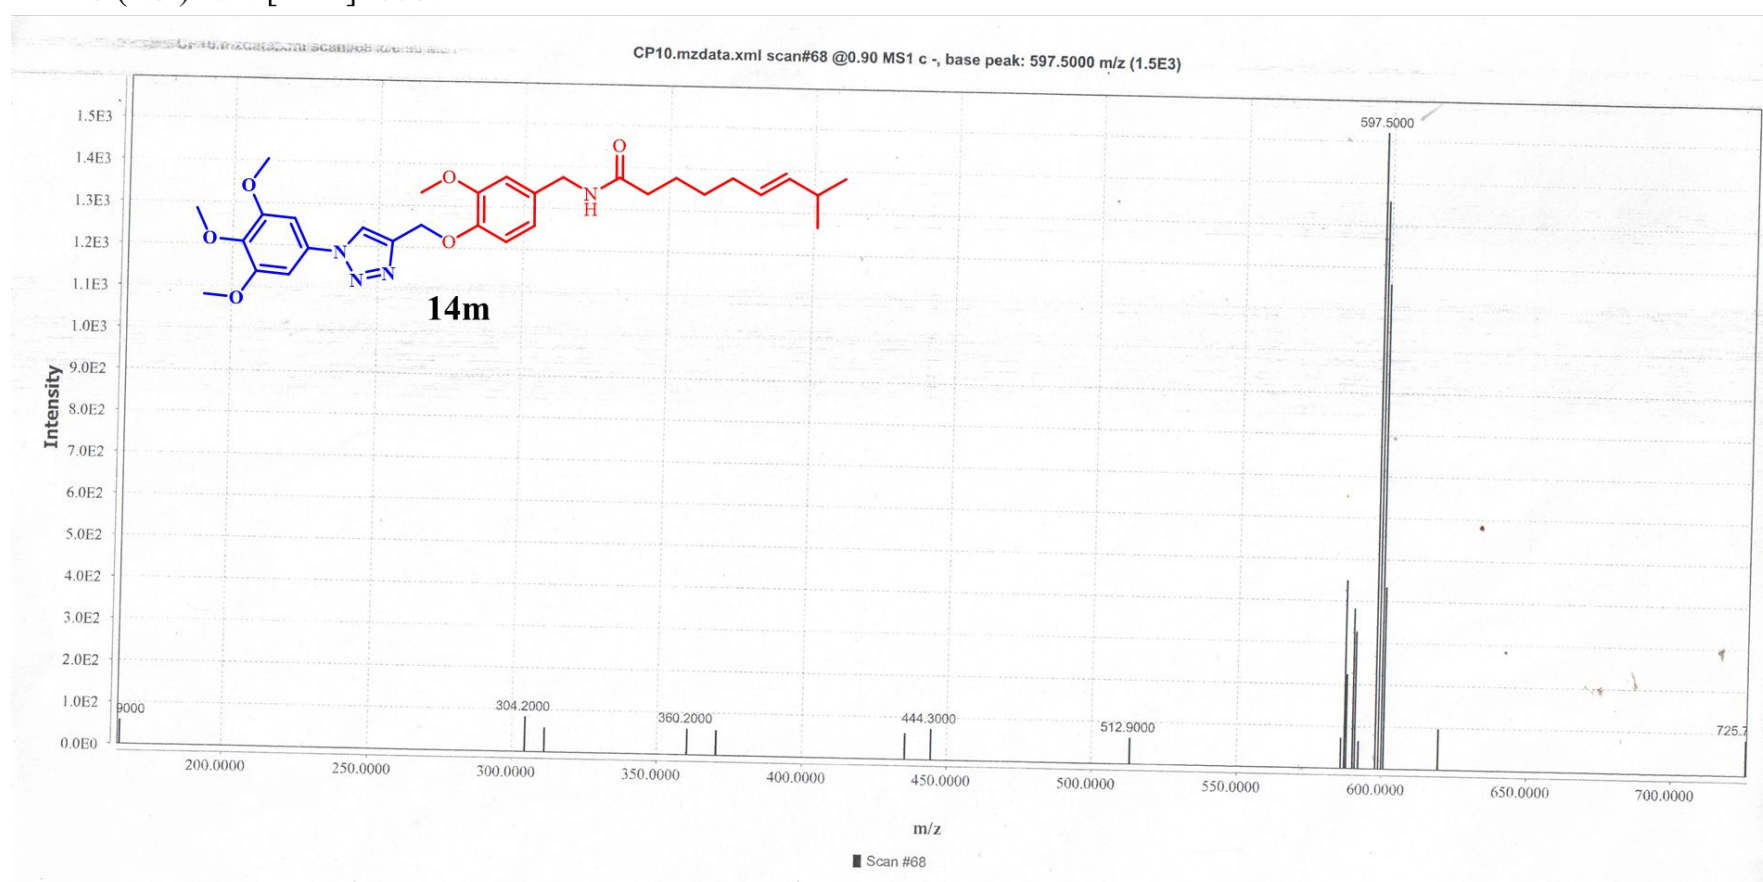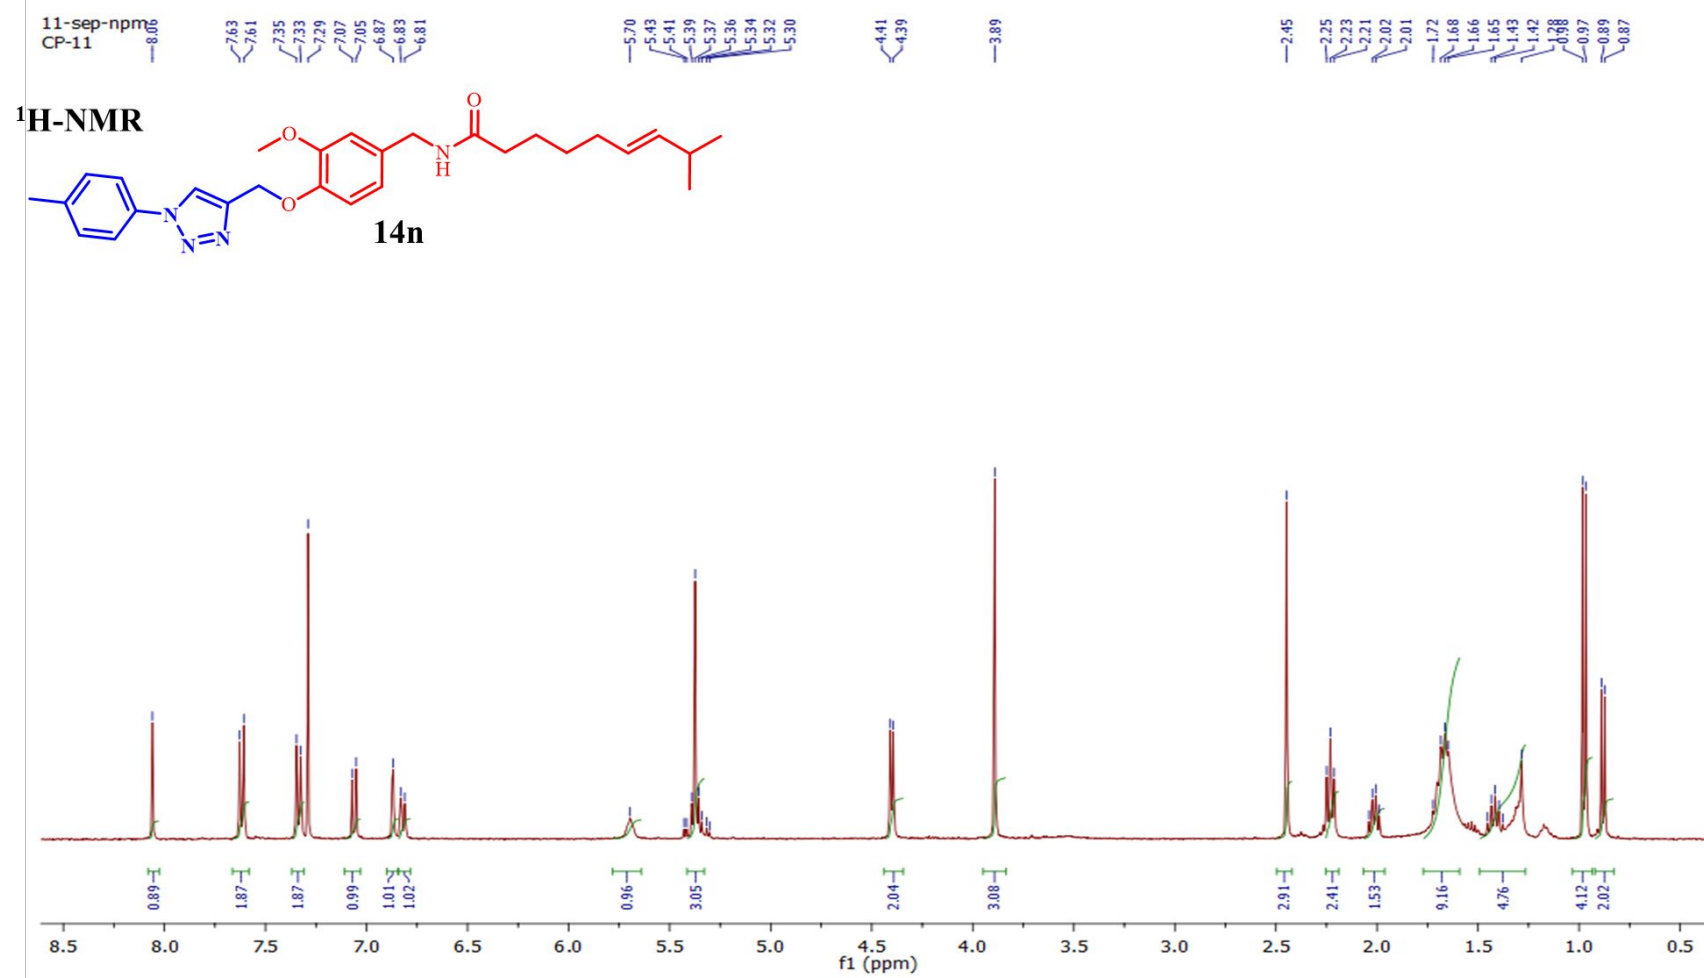

MS (ESI)  $m/z$ :  $[M+1]^+$  477.2

CP11.mzdata.xml scan#29 @0.40 MS1 c +, base peak: 477.2000  $m/z$  (1.1E6)

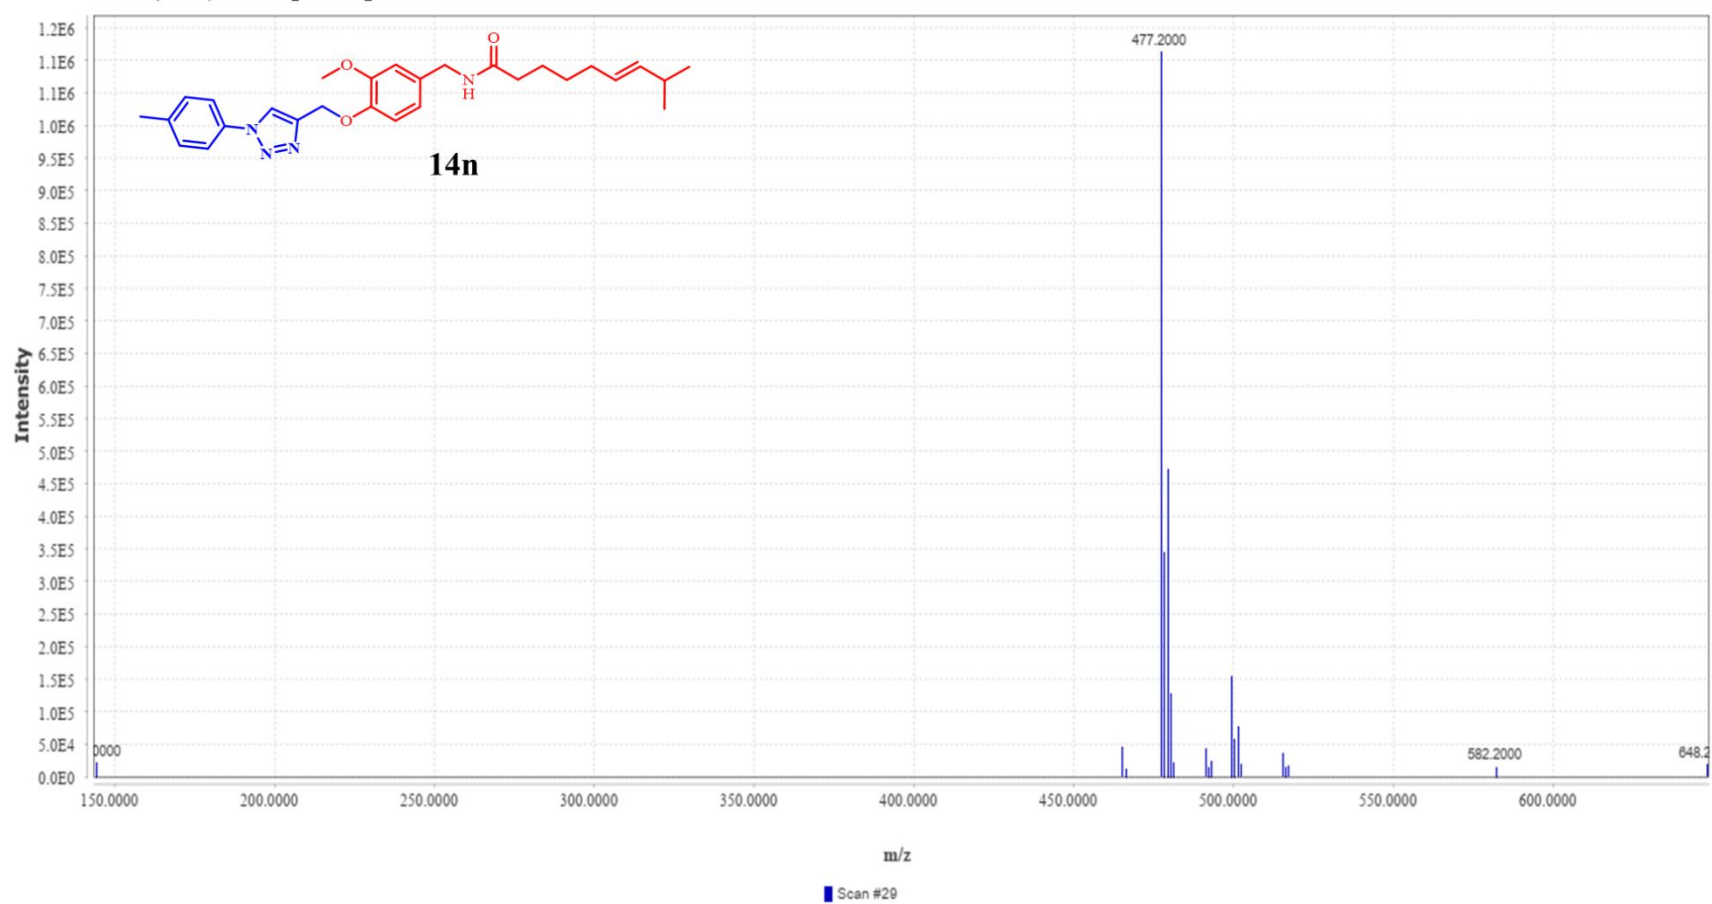

$^1\text{H-NMR}$

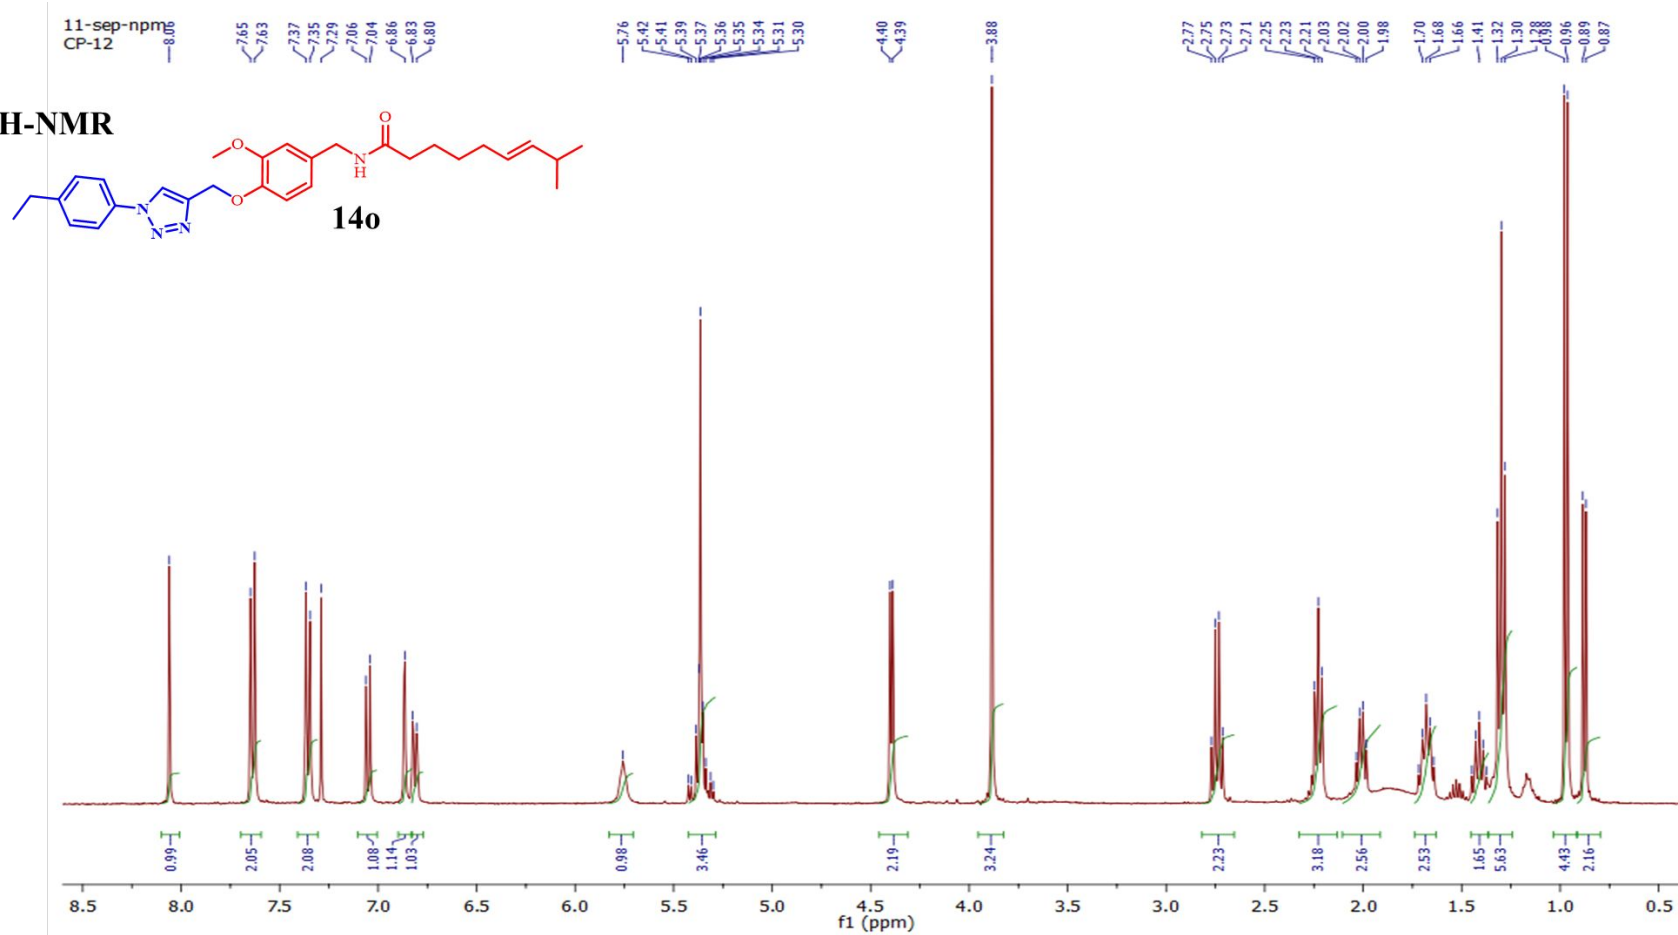

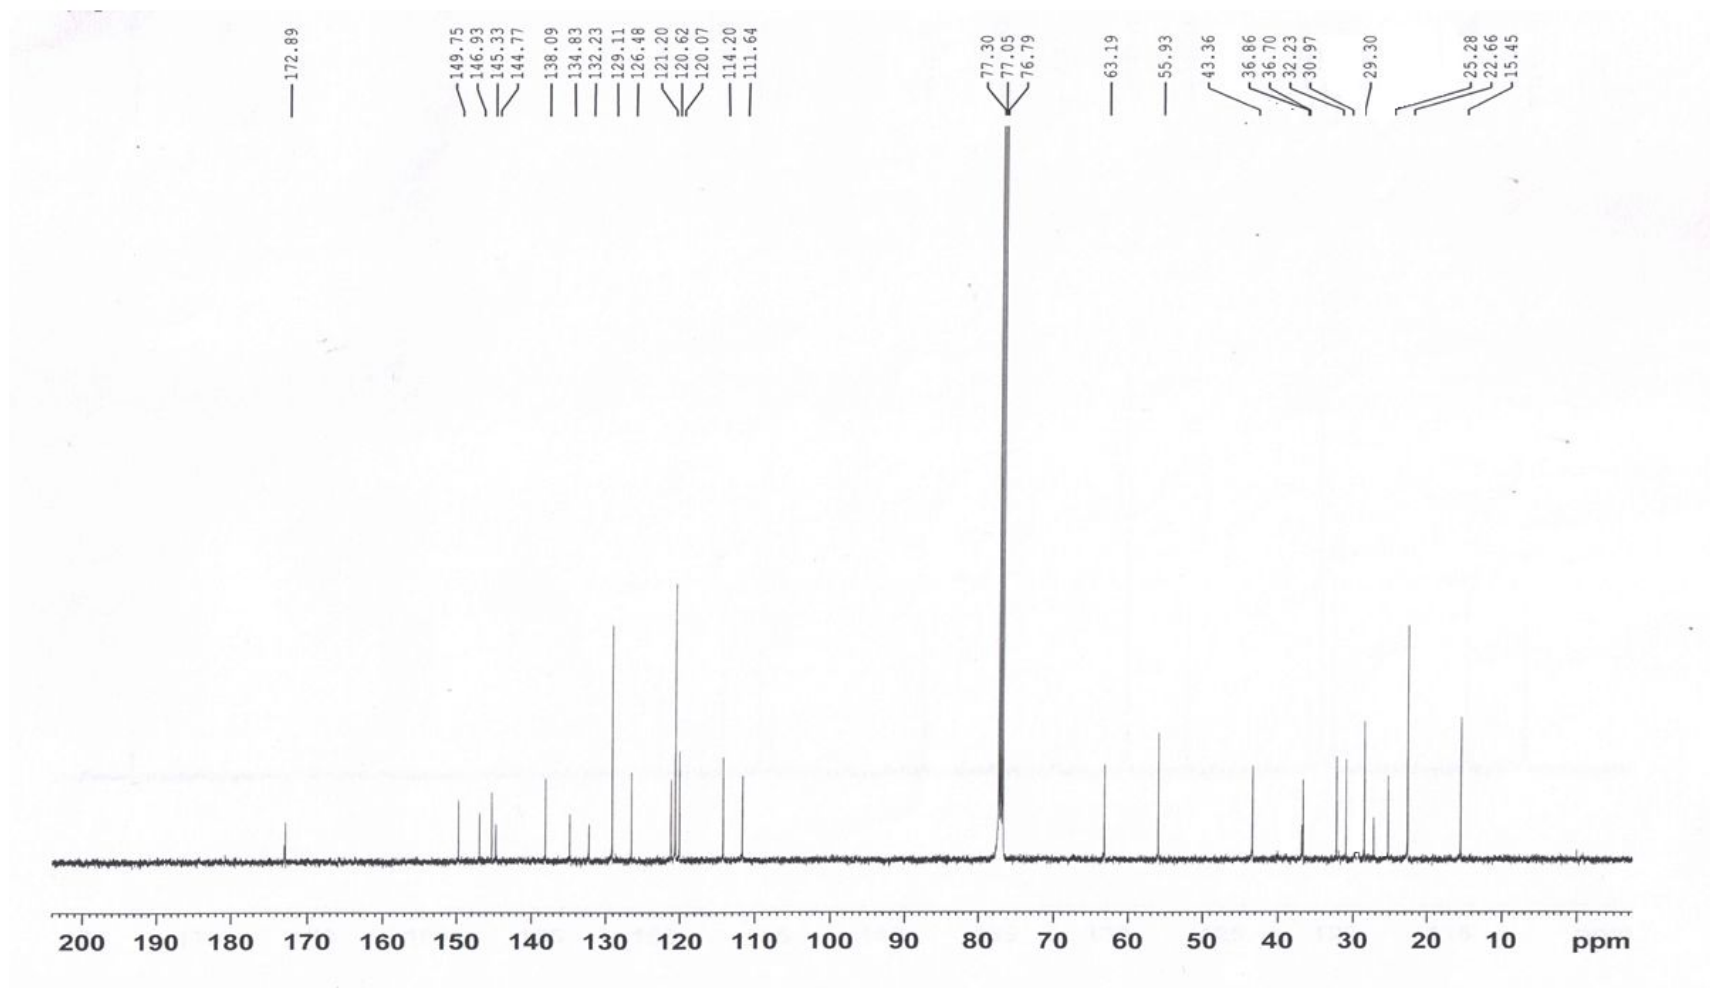

MS (ESI)  $m/z$ :  $[M+1]^+$  491.1

CP12.mzdata.xml scan#31 @0.40 MS1 c +, base peak: 491.1000  $m/z$  (8.9E5)

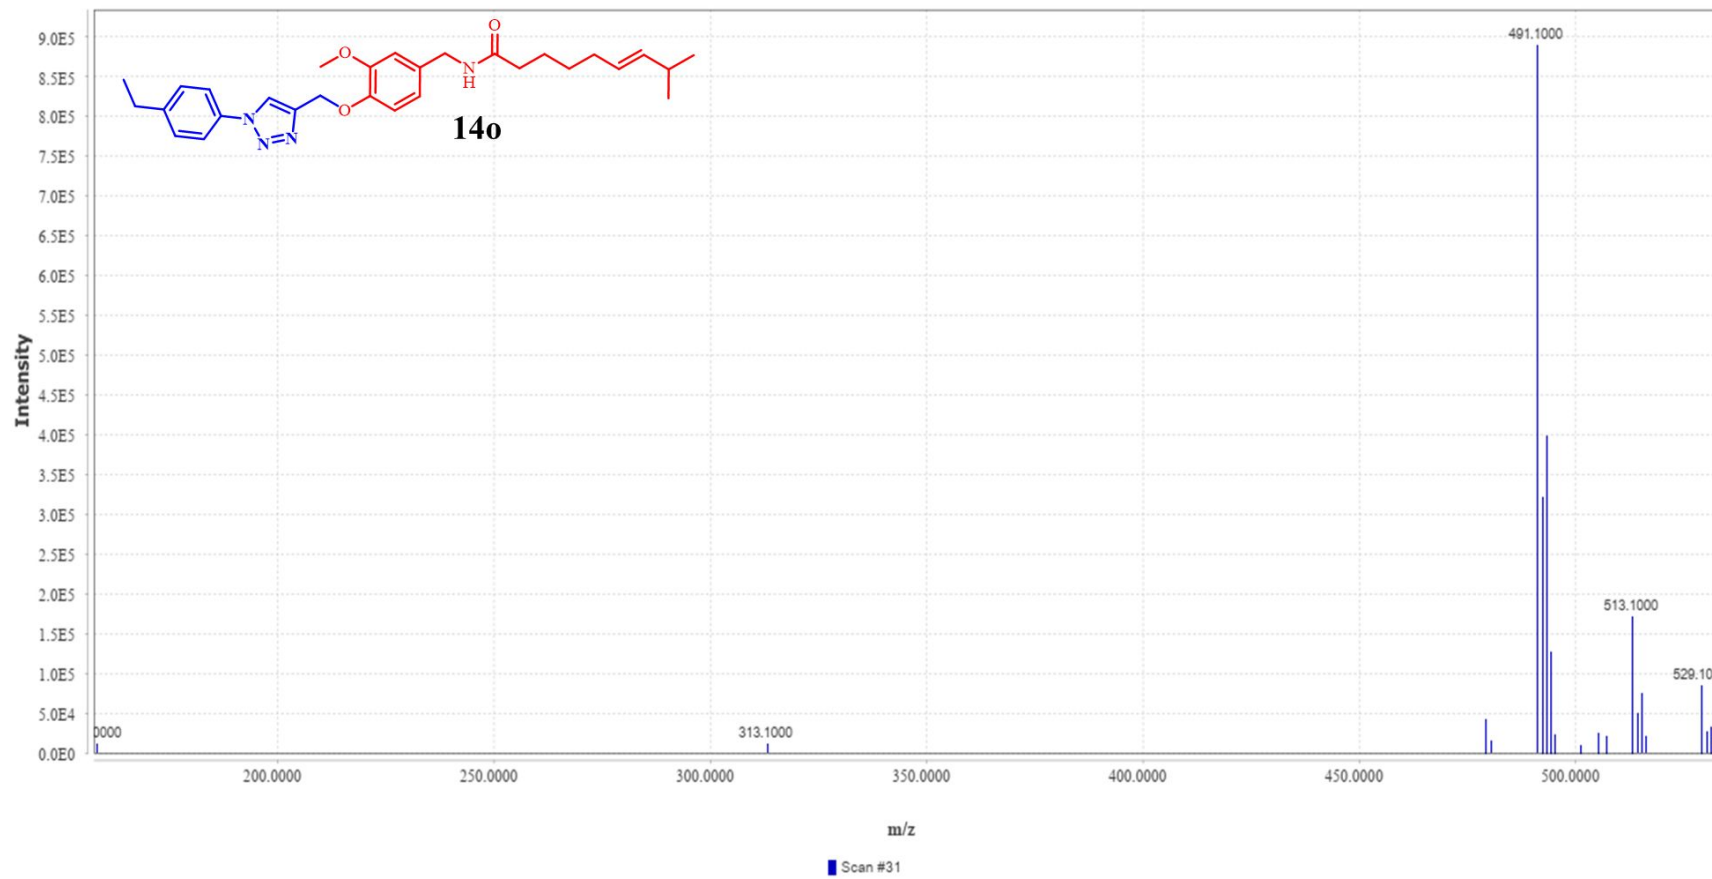



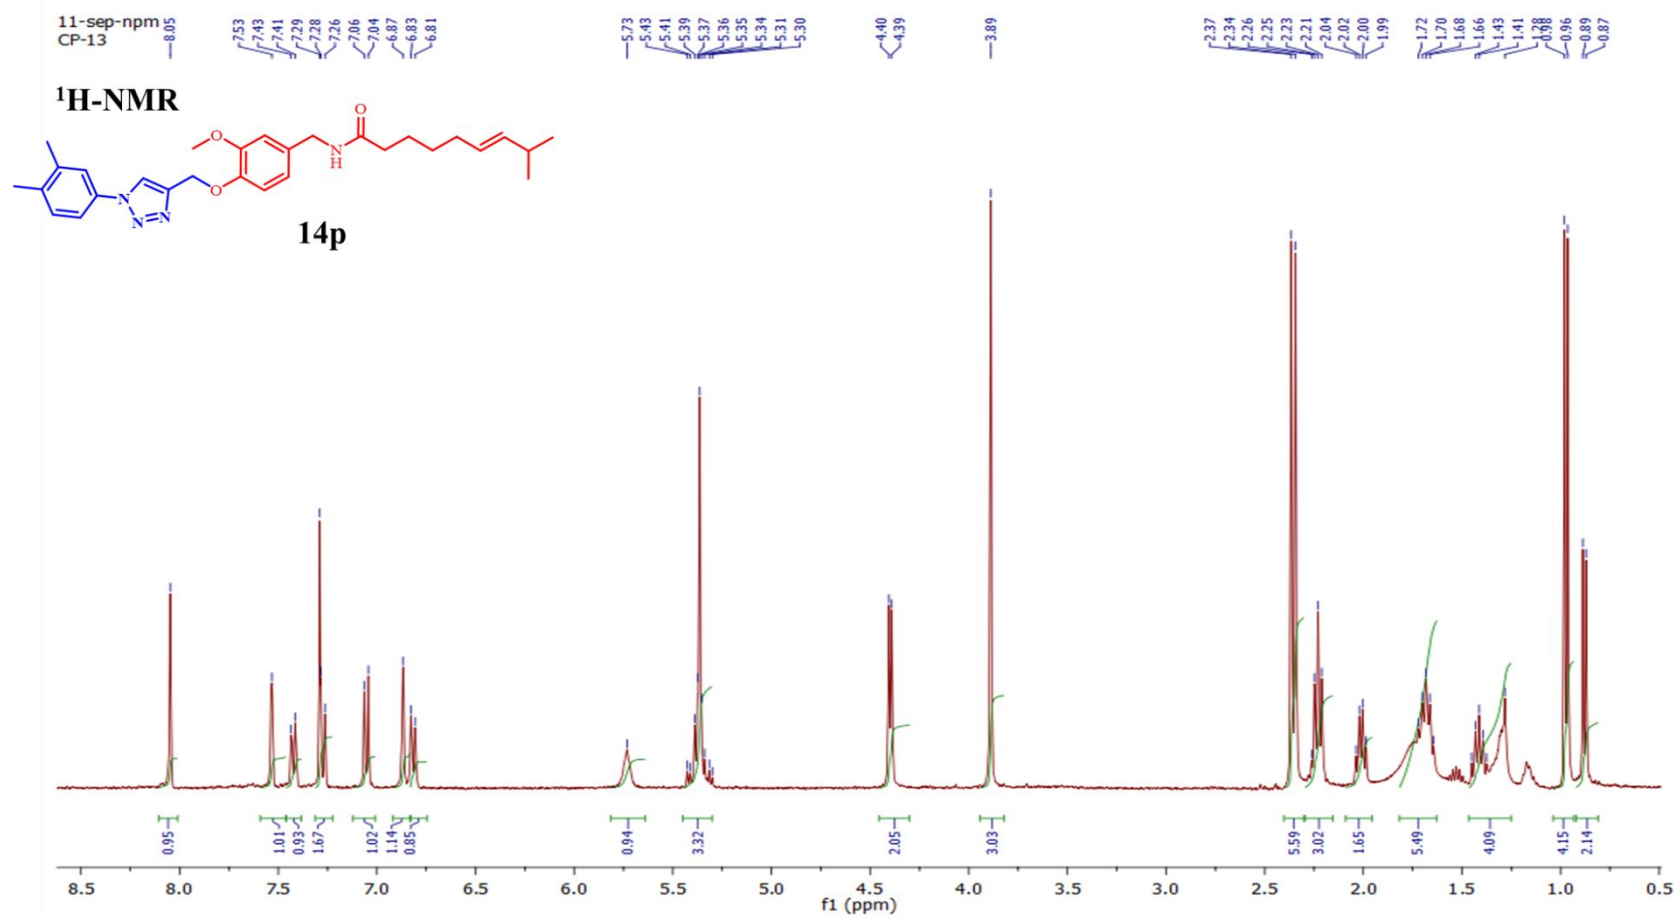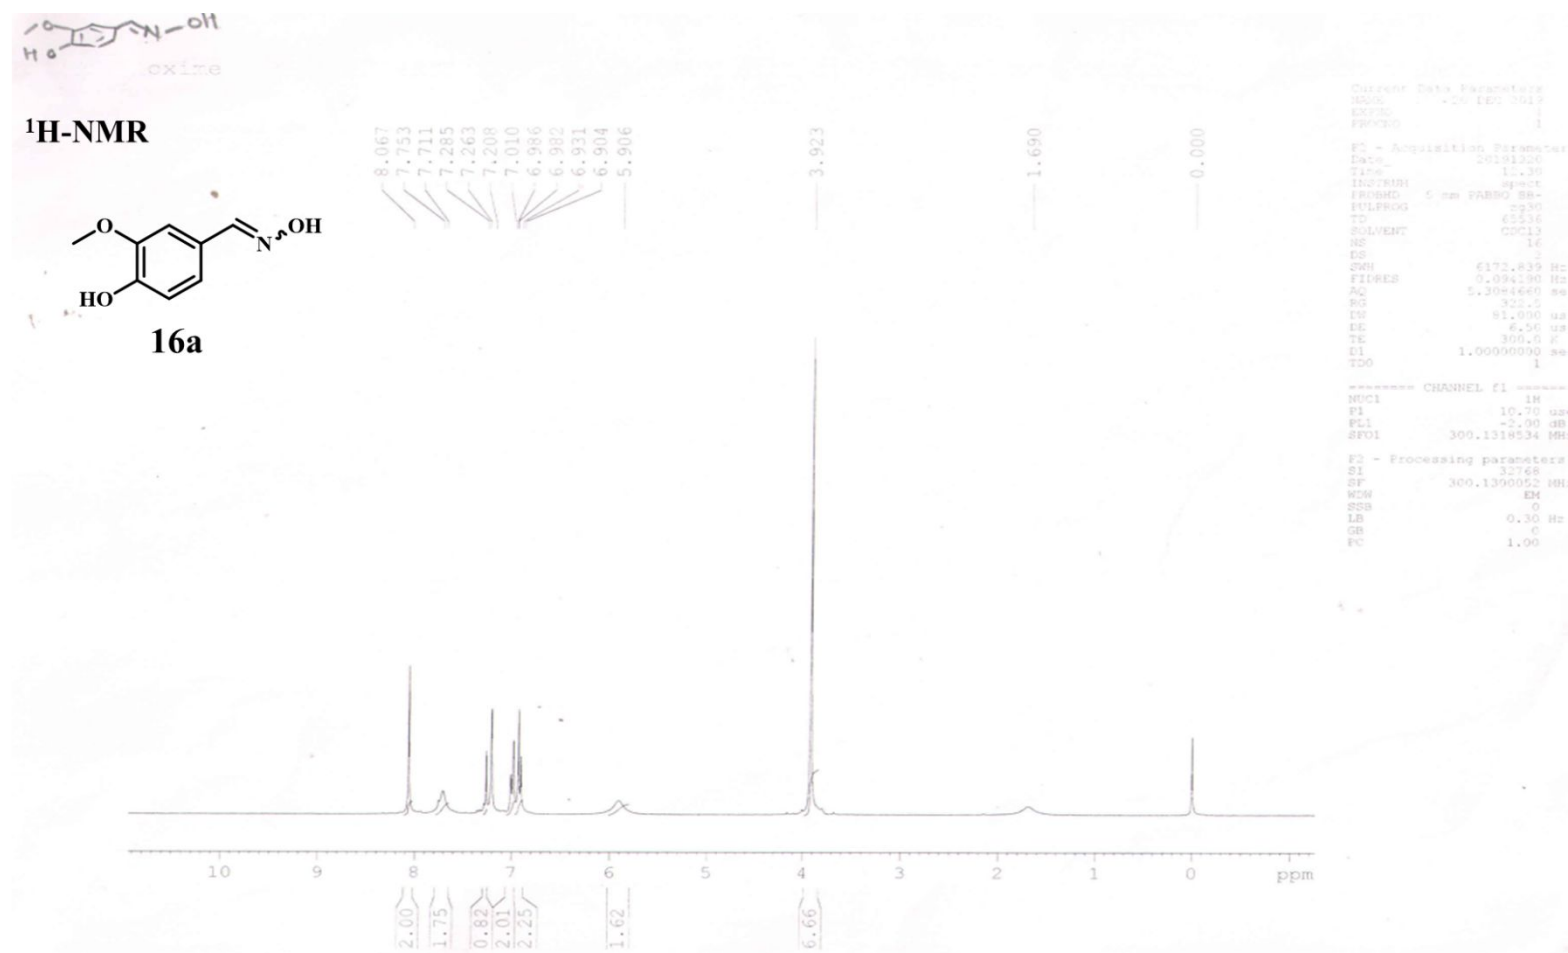

<sup>1</sup>H-NMR

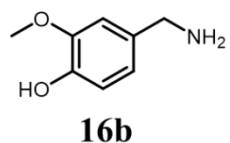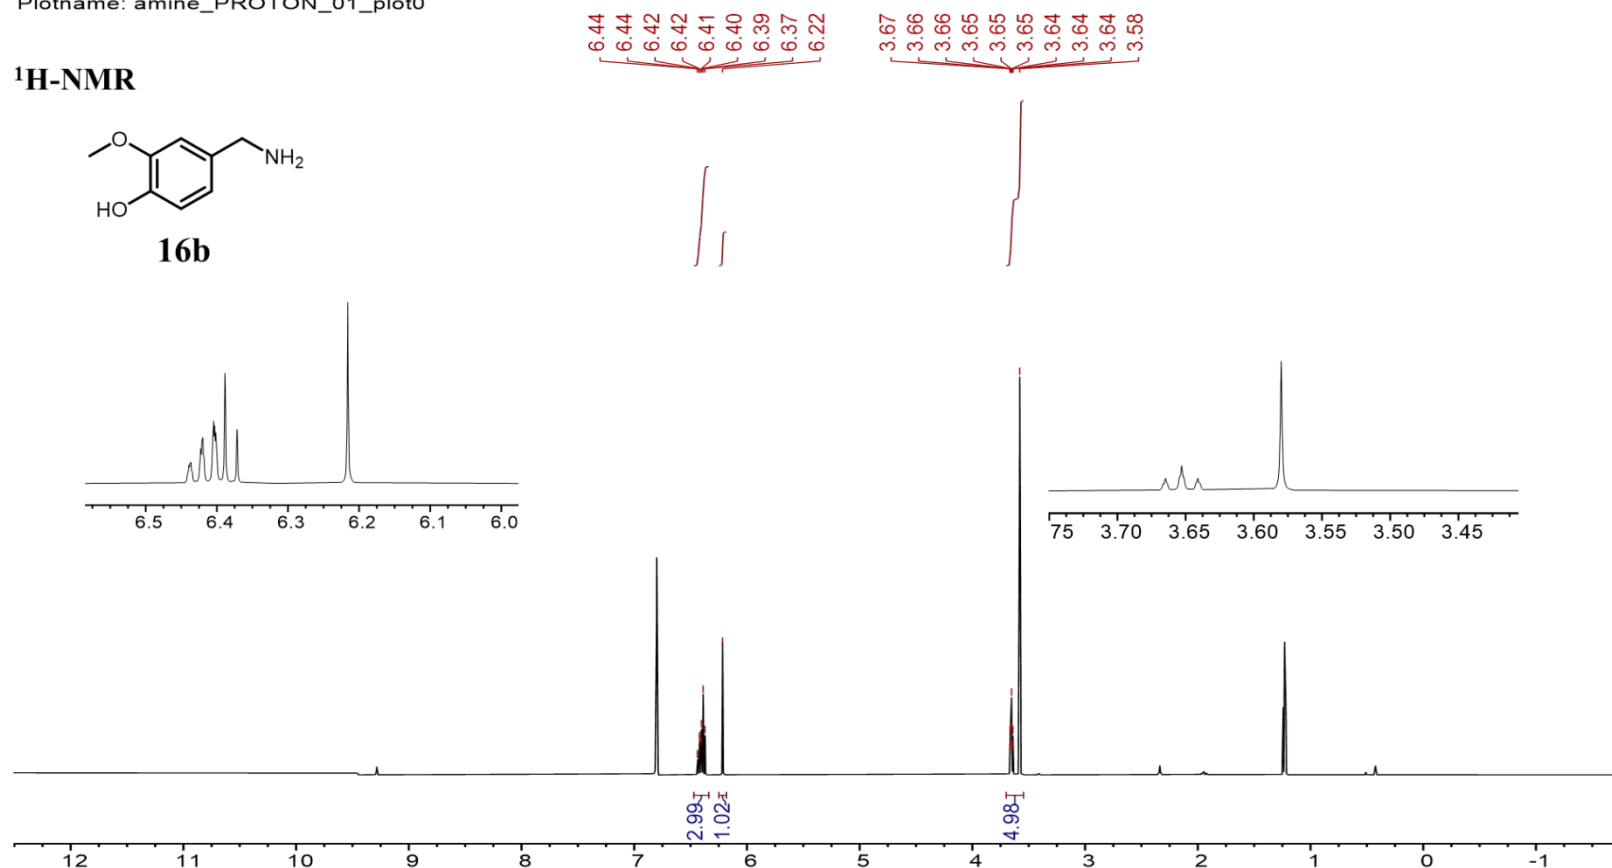

<sup>1</sup>H-NMR

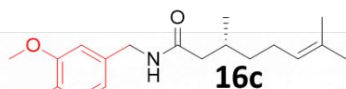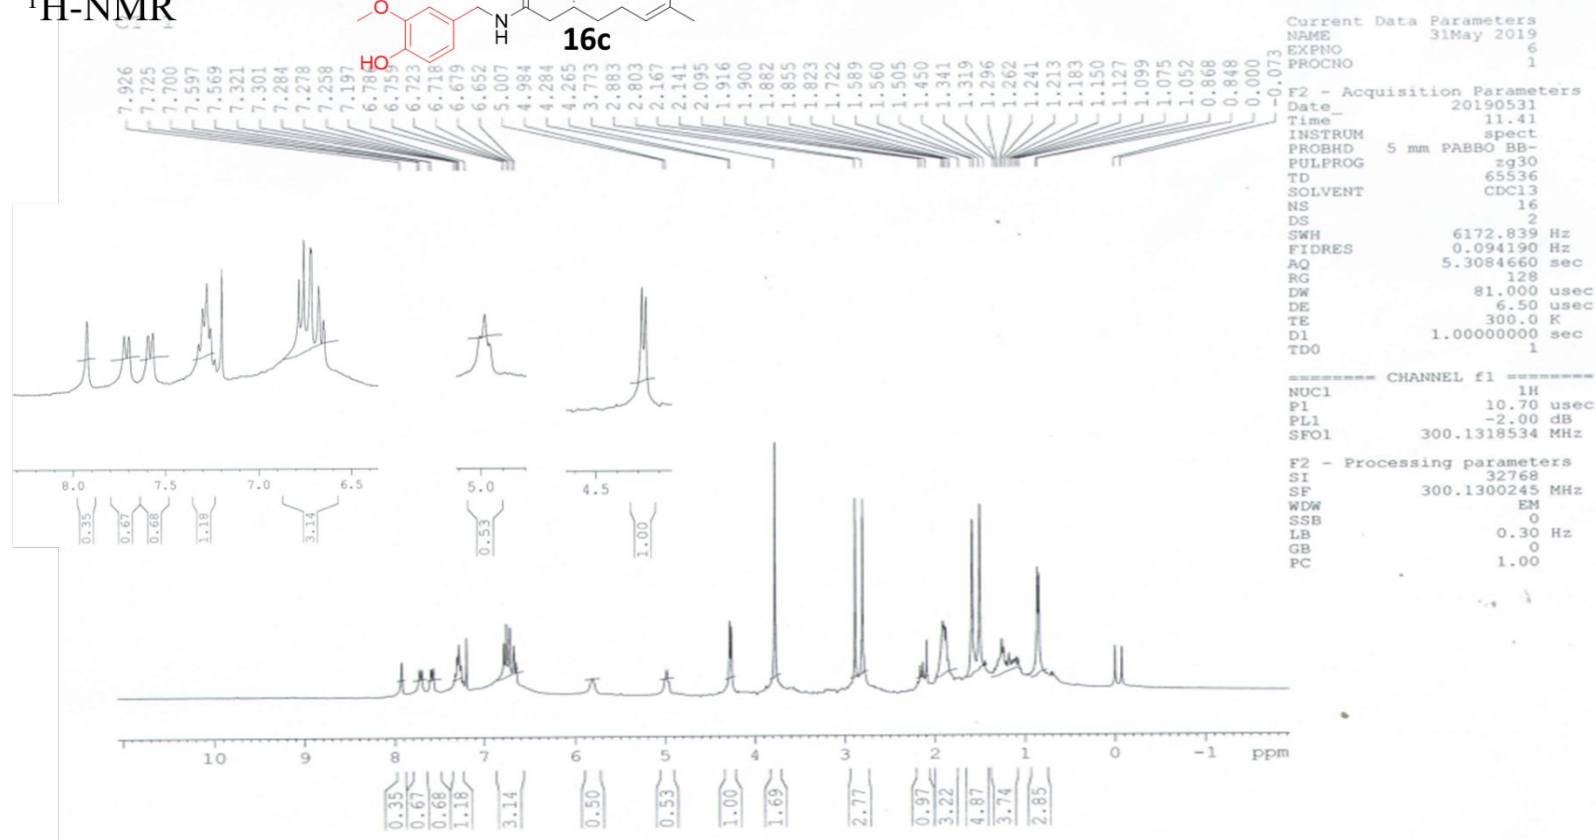

<sup>1</sup>H-NMR

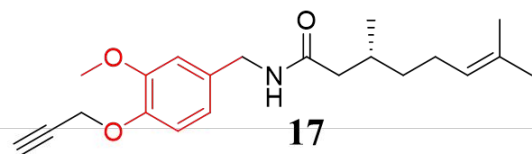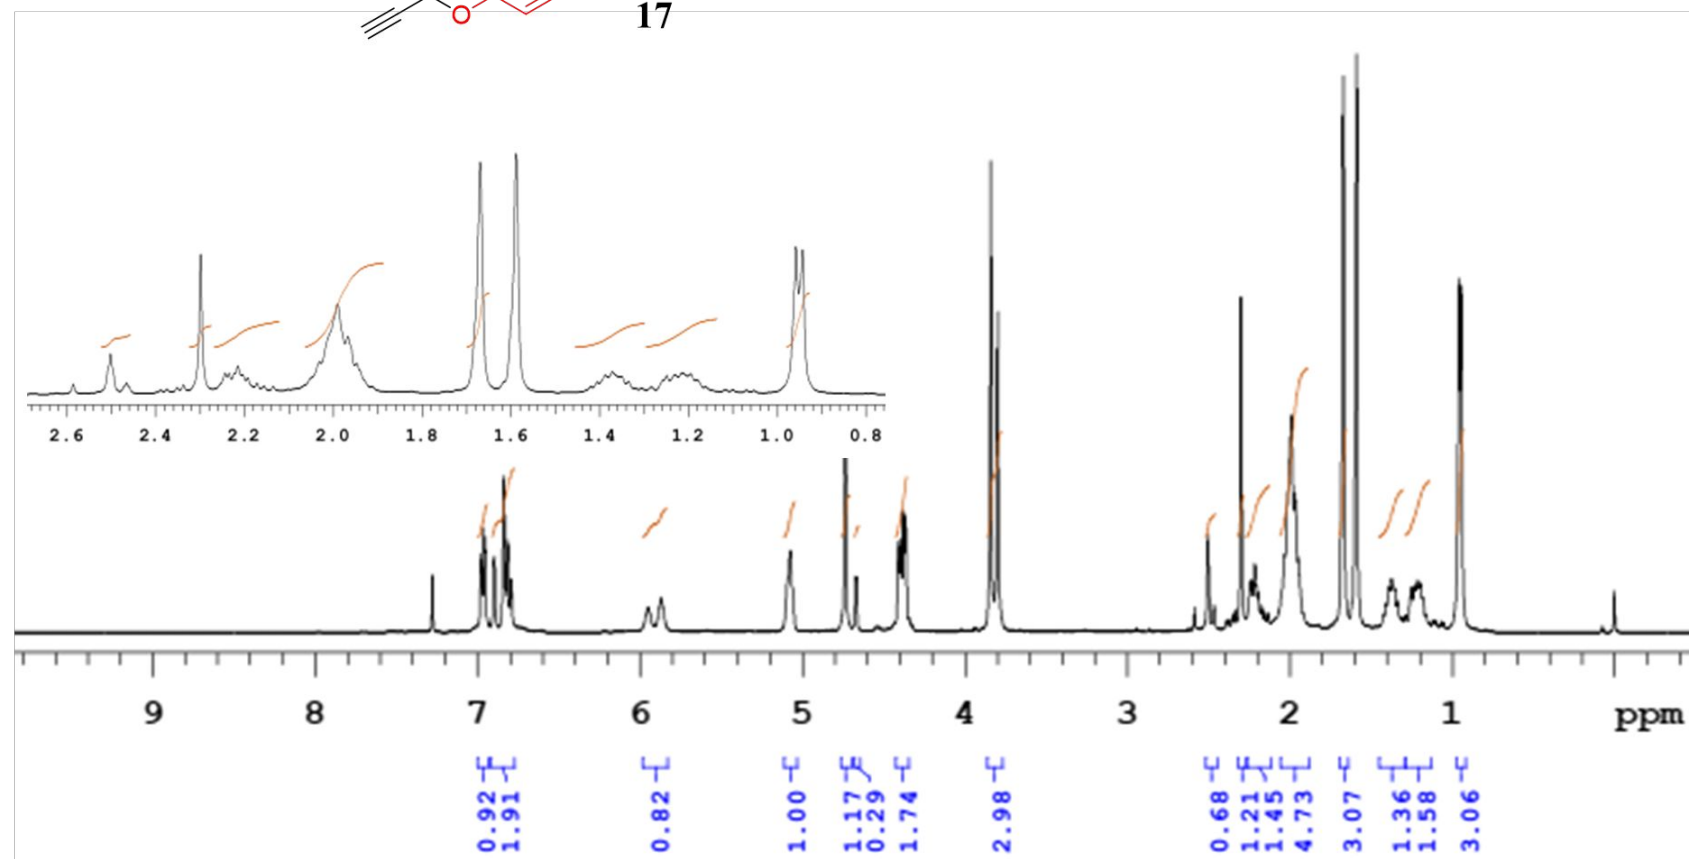

Sample code: SAD3  
VARIAN 400MHz NMR  
Solvent: CDCl3  
Date: Jul 10 2021

<sup>1</sup>H-NMR

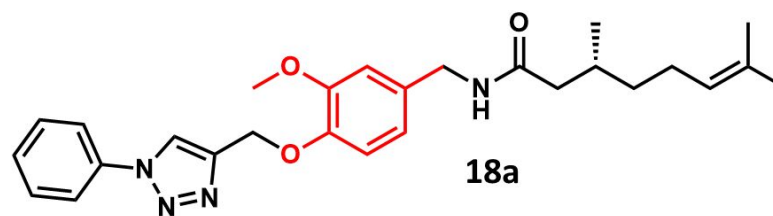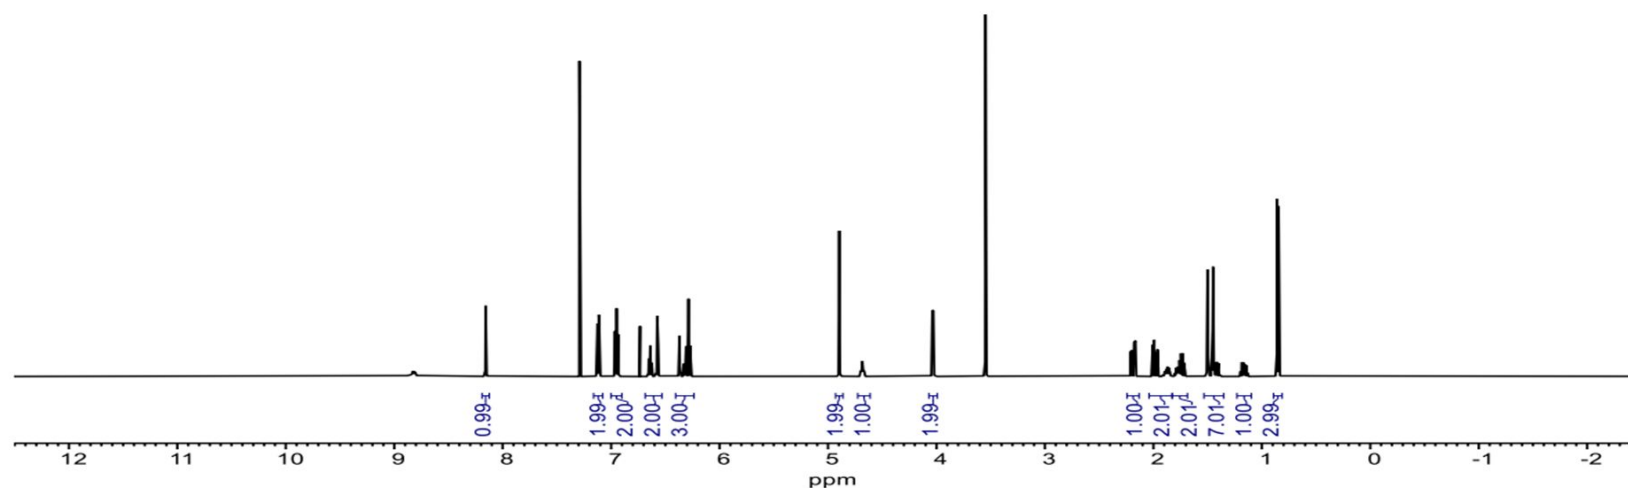

Plotname: SAD2\_PROTON\_01\_plot01

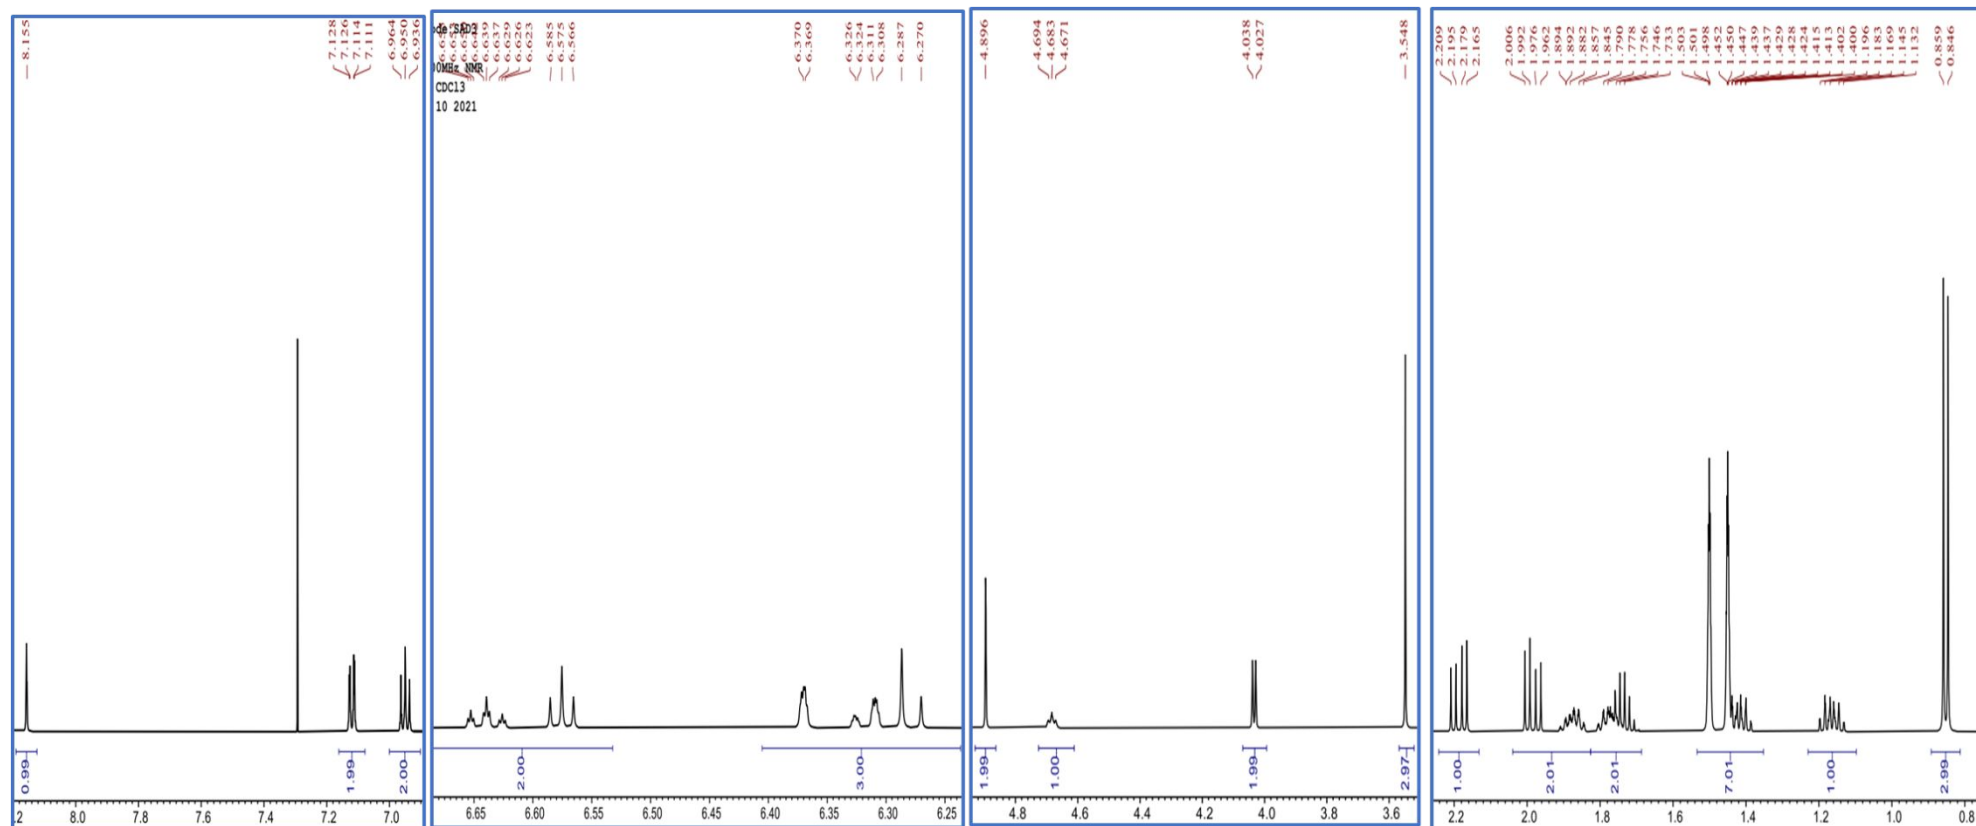

<sup>13</sup>C-NMR  
**18a**

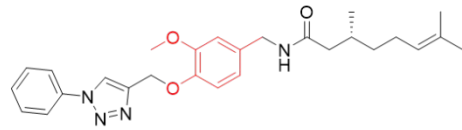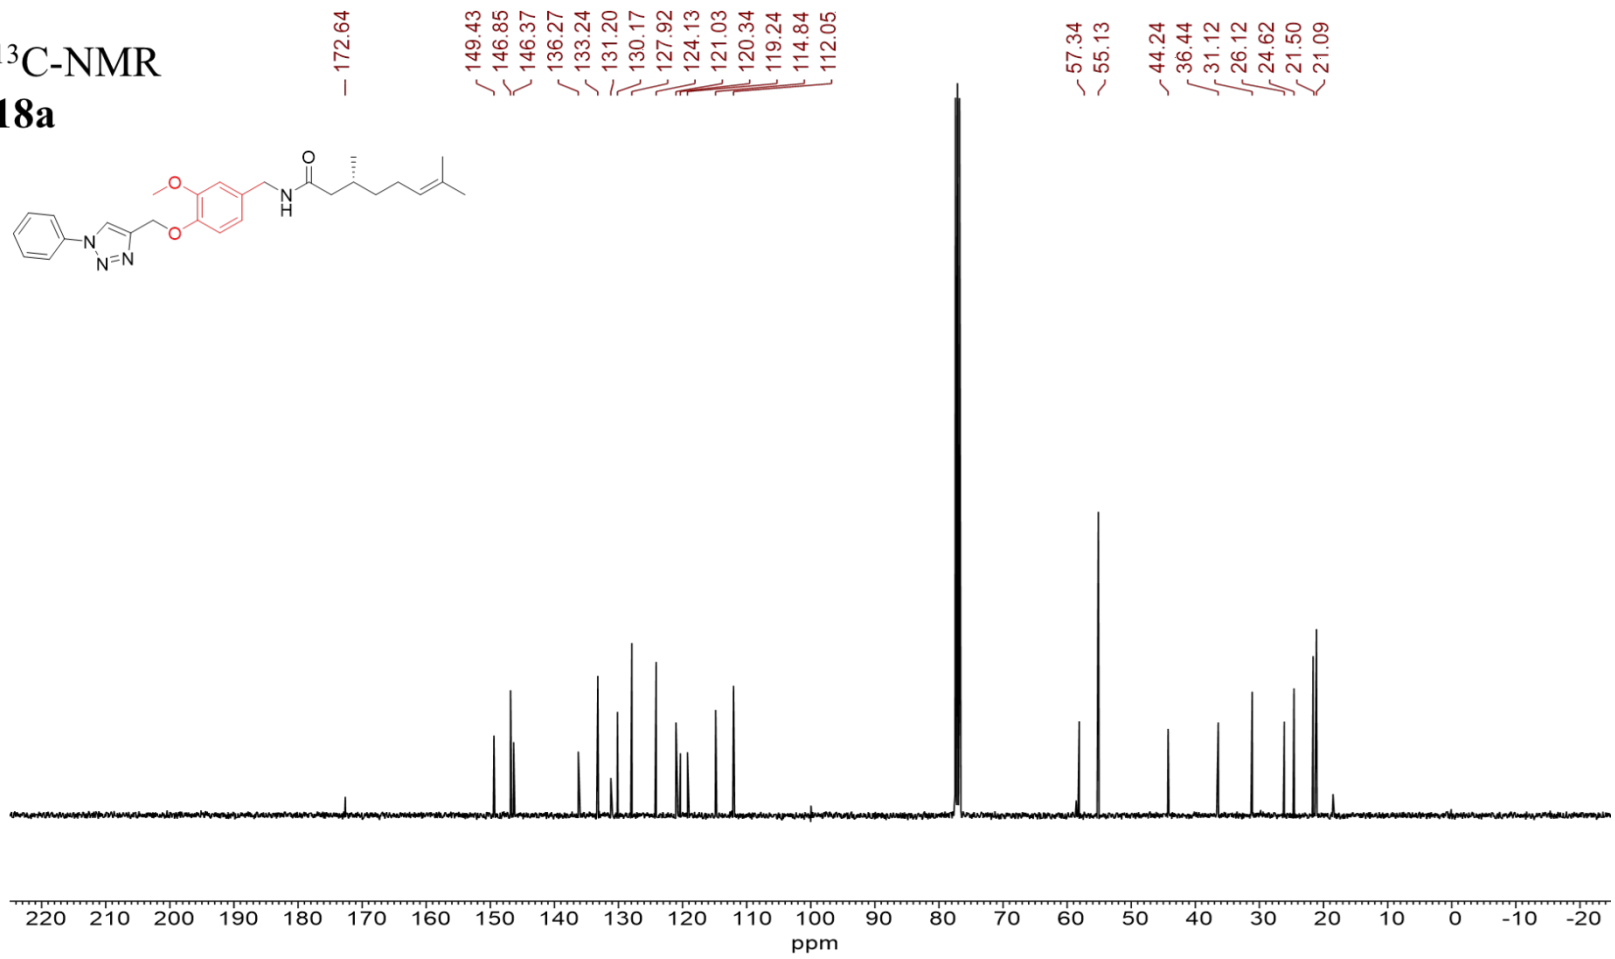

ESI-MS

**18a**

Page 1

| Retention Time (MS) | MS Area  | Mol. Weight or Ion |
|---------------------|----------|--------------------|
| 0.297               | 61032508 | 137.06 I           |
|                     |          | 330.058 I          |
|                     |          | 463.25 I           |
|                     |          | 466.25 I           |

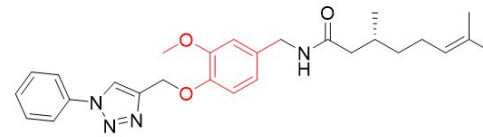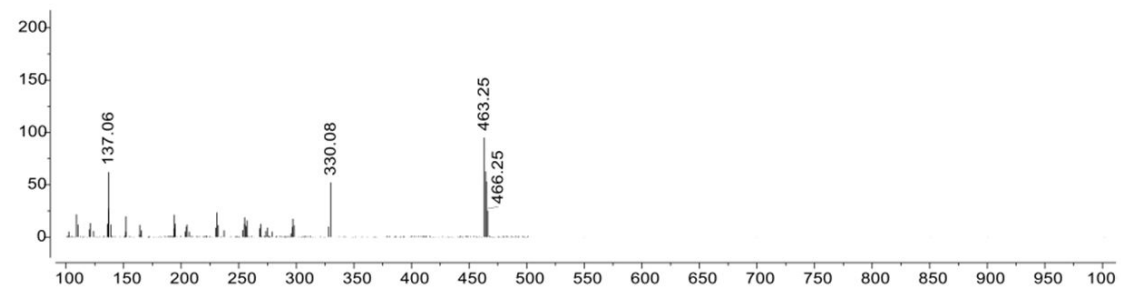

Sample code: SAD2

VARIAN 400MHz NMR

Solvent: CDCl3

Date: Jul 10 2021

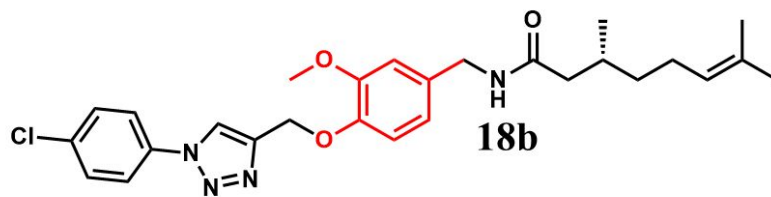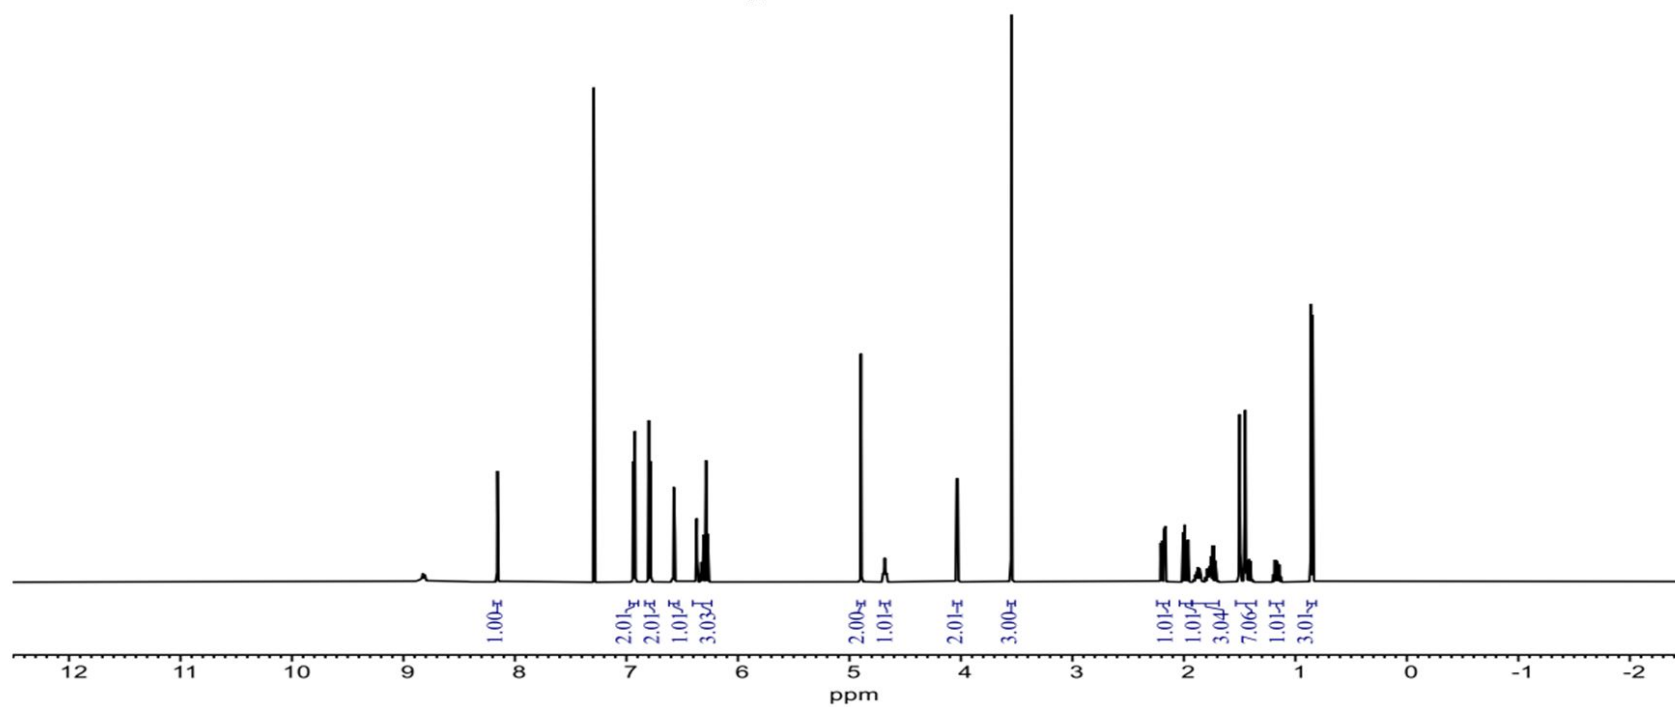

Plotname: SAD2\_PROTON\_01\_plot01

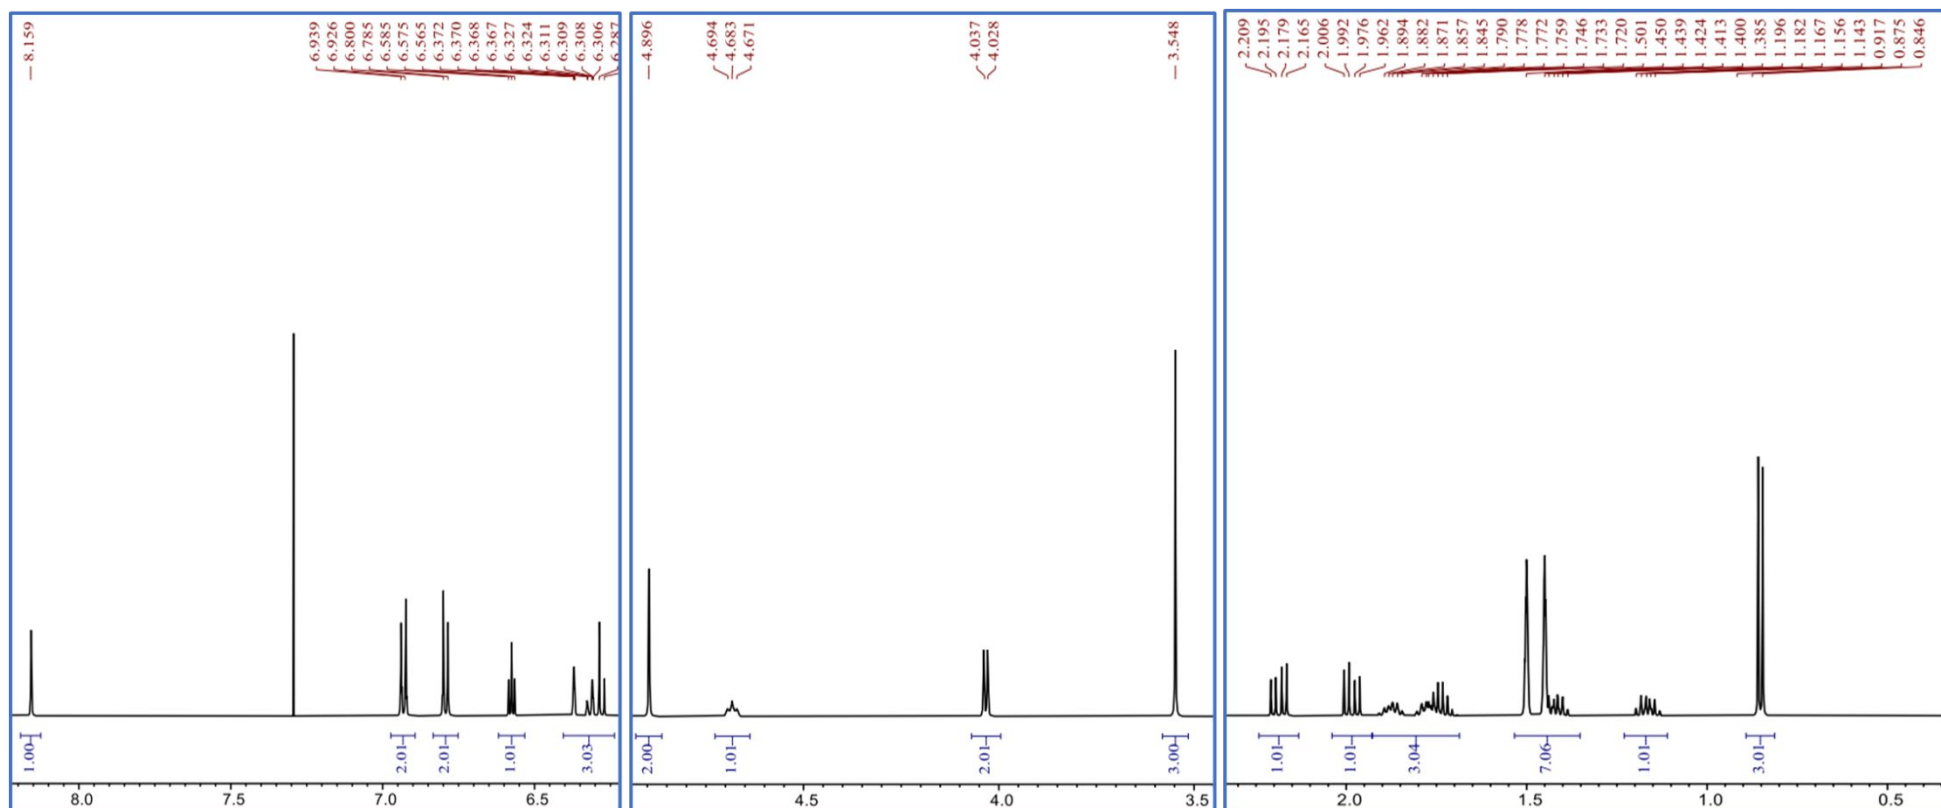

<sup>13</sup>C-NMR  
**18b**

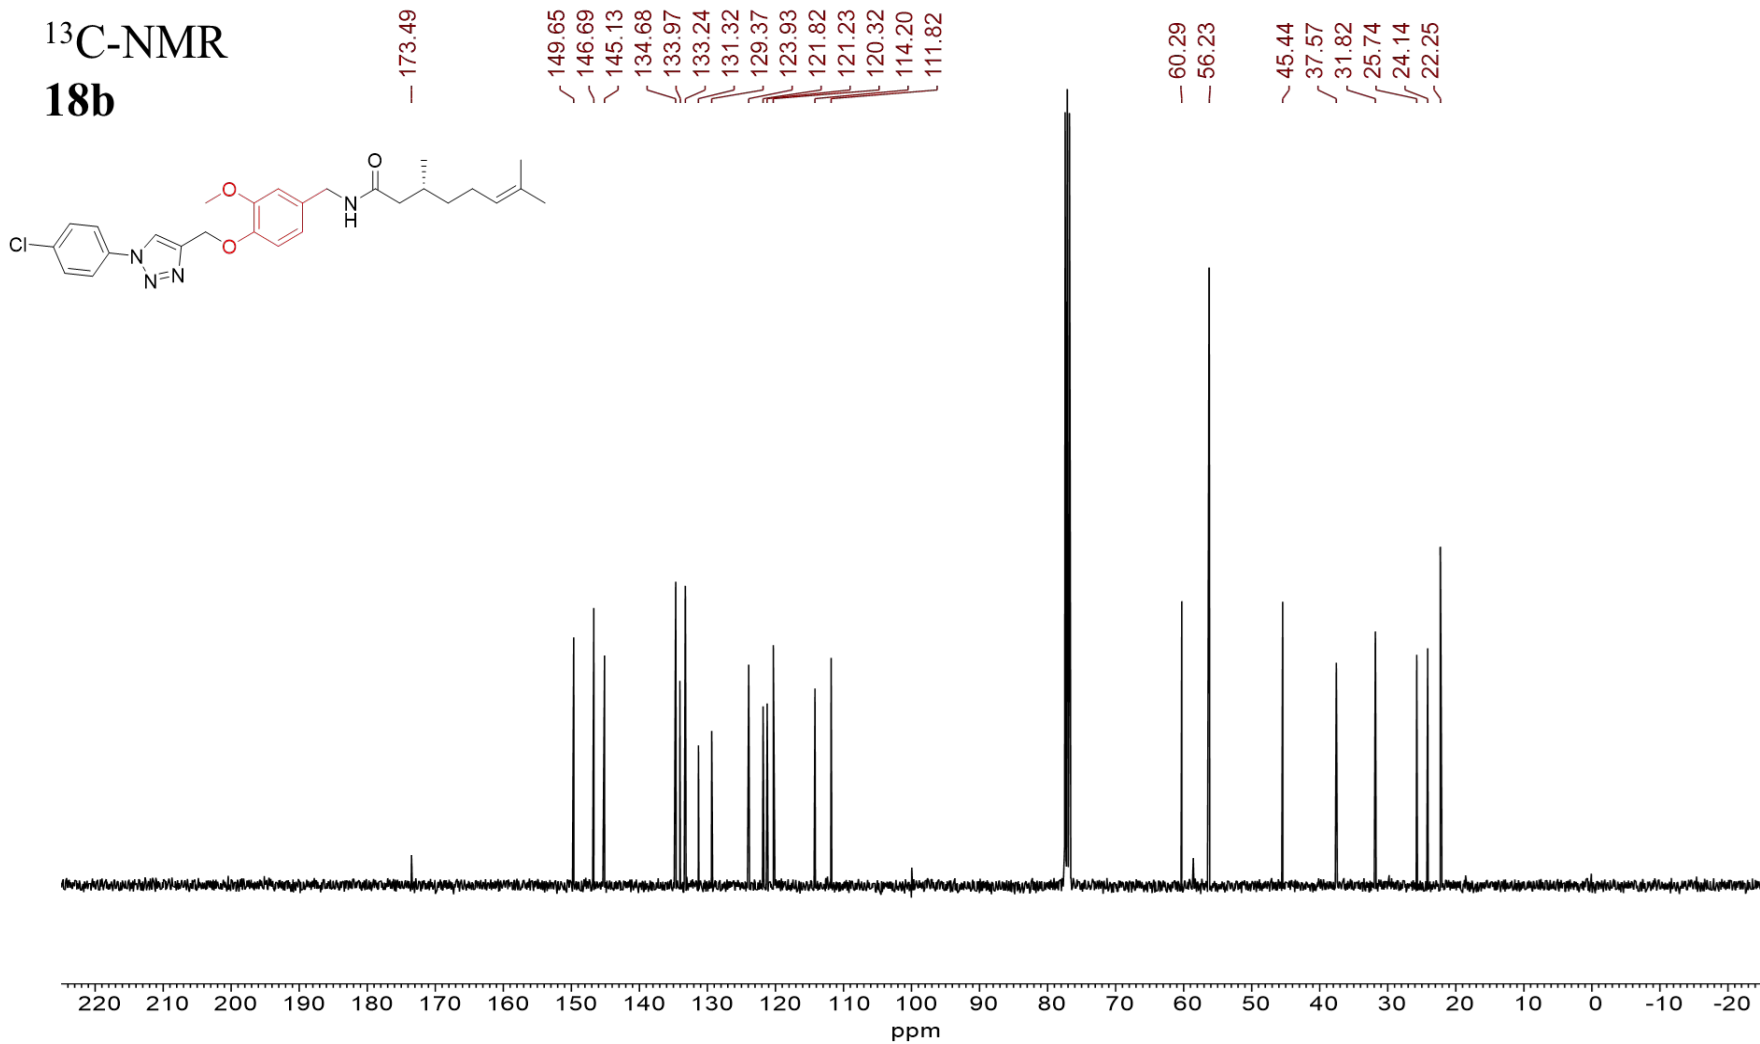

ESI-MS

**18b**

Page 1

| Retention Time (MS) | MS Area  | Mol. Weight or Ion                            |
|---------------------|----------|-----------------------------------------------|
| 0.301               | 71131512 | 137.06 I<br>330.058 I<br>497.22 I<br>498.79 I |

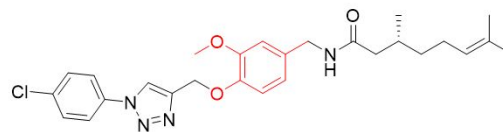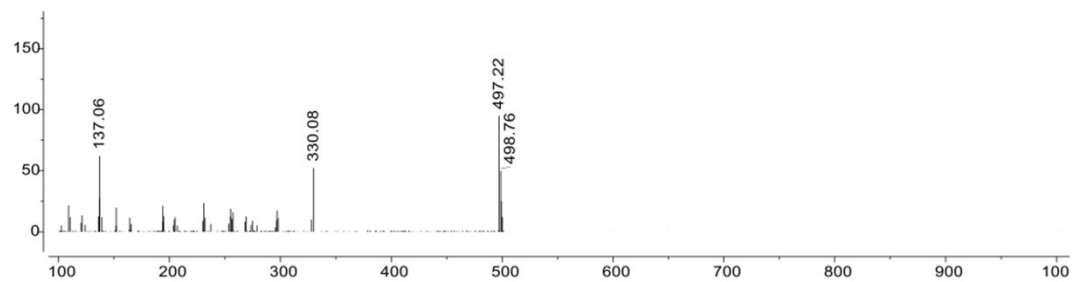

<sup>1</sup>H-NMR  
18c

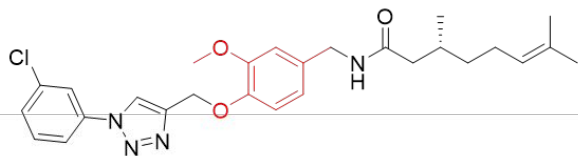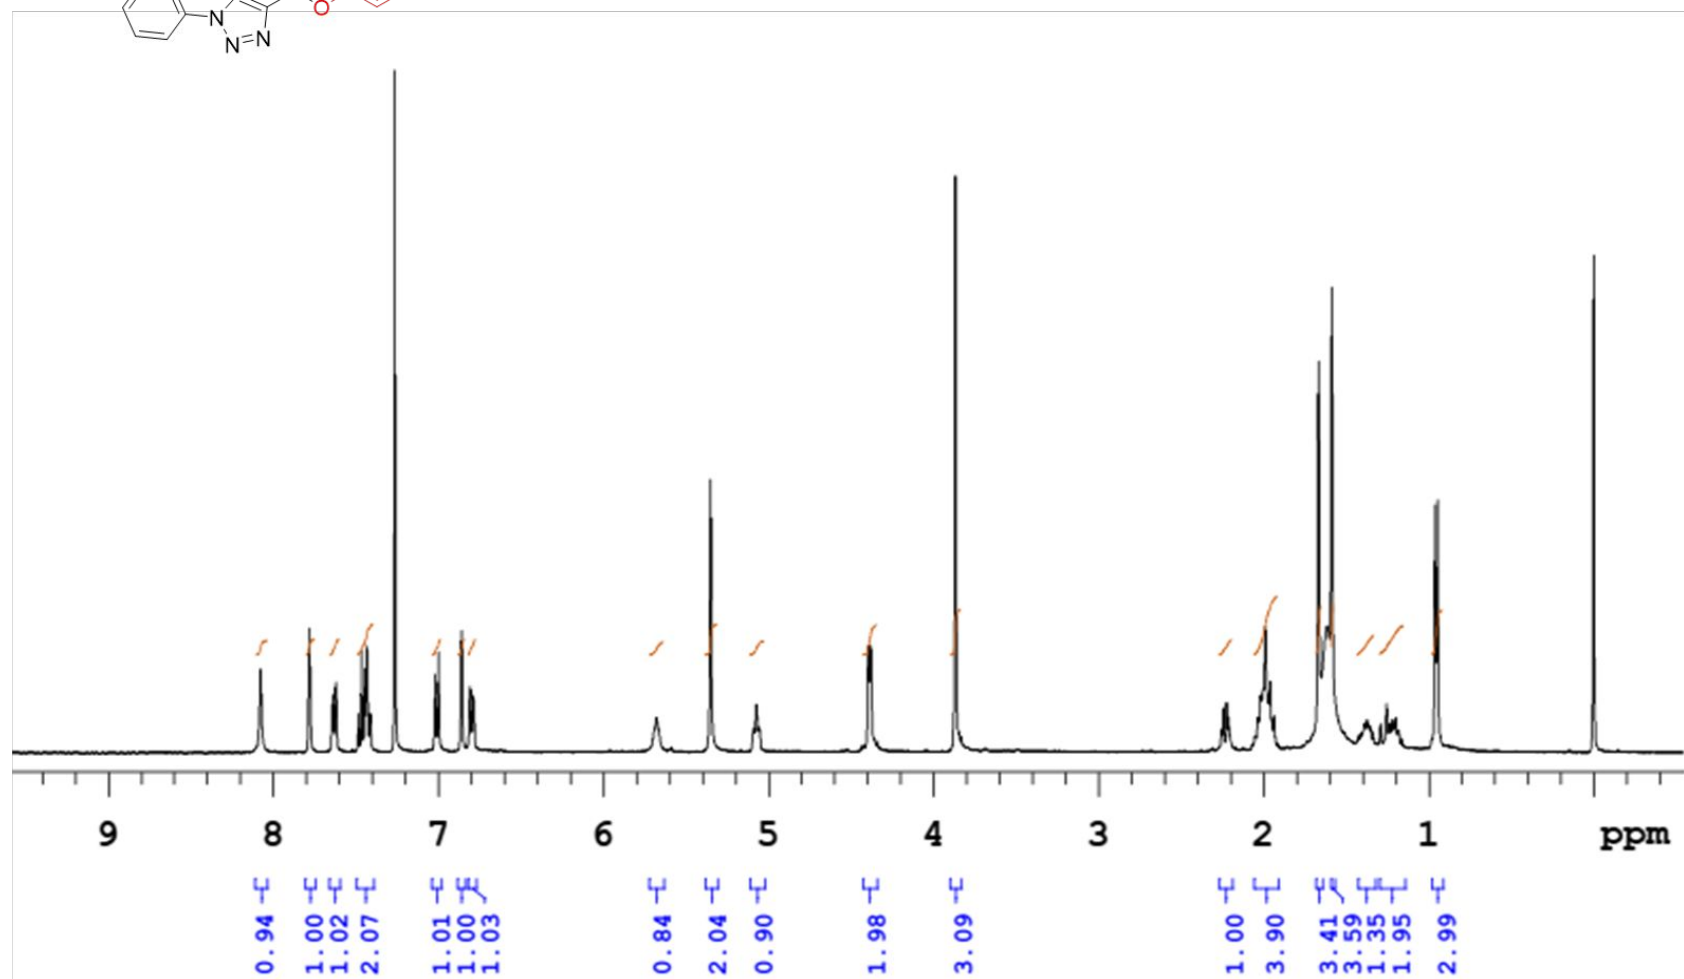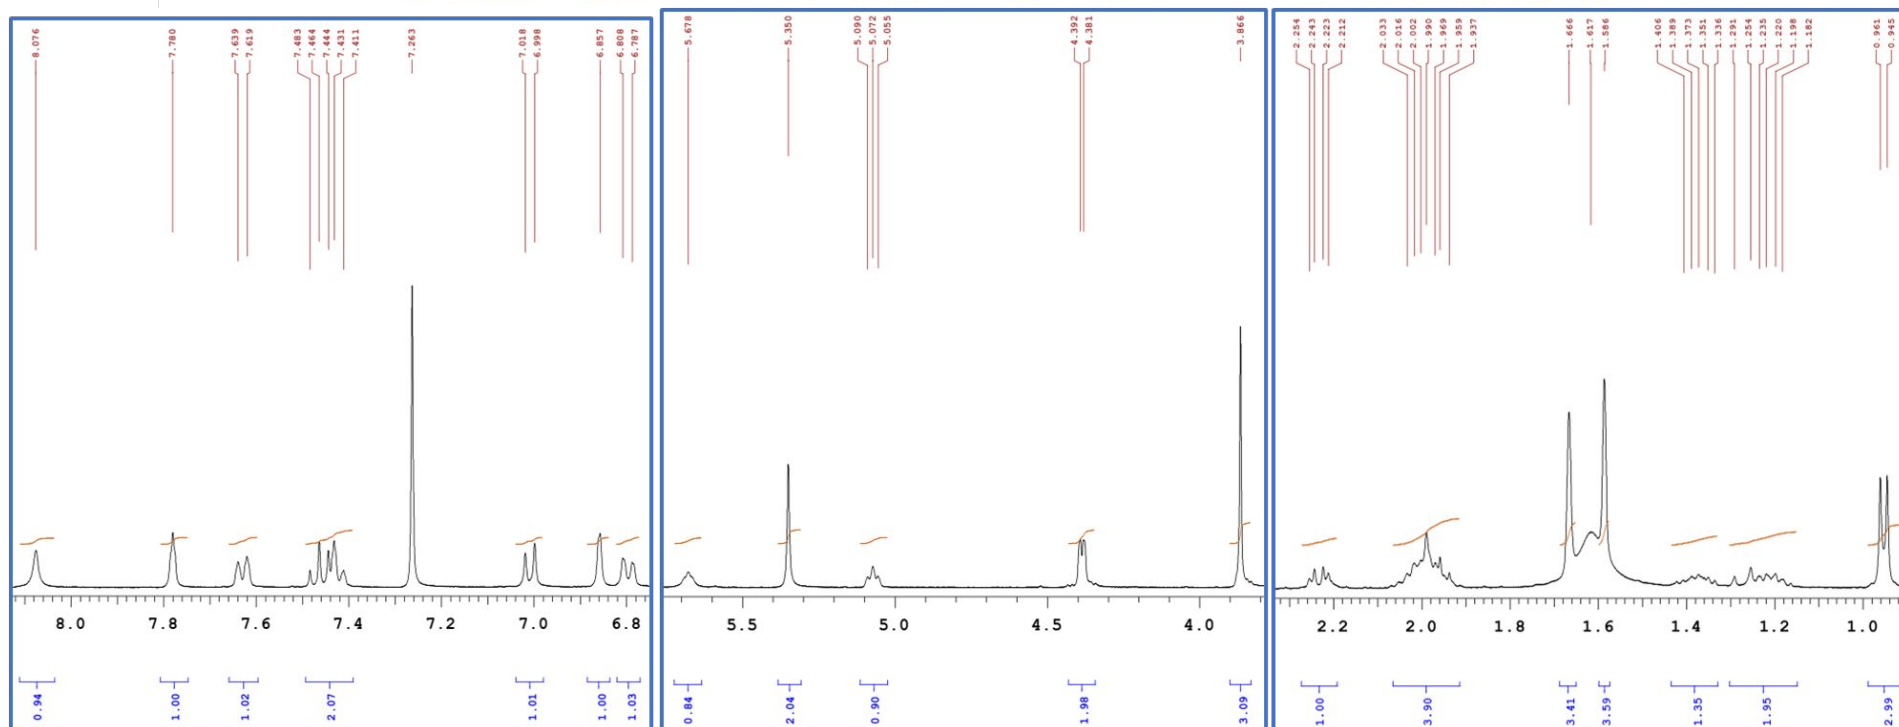



<sup>13</sup>C-NMR  
18c

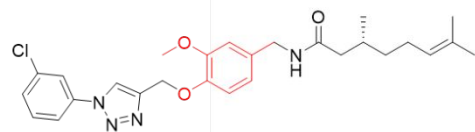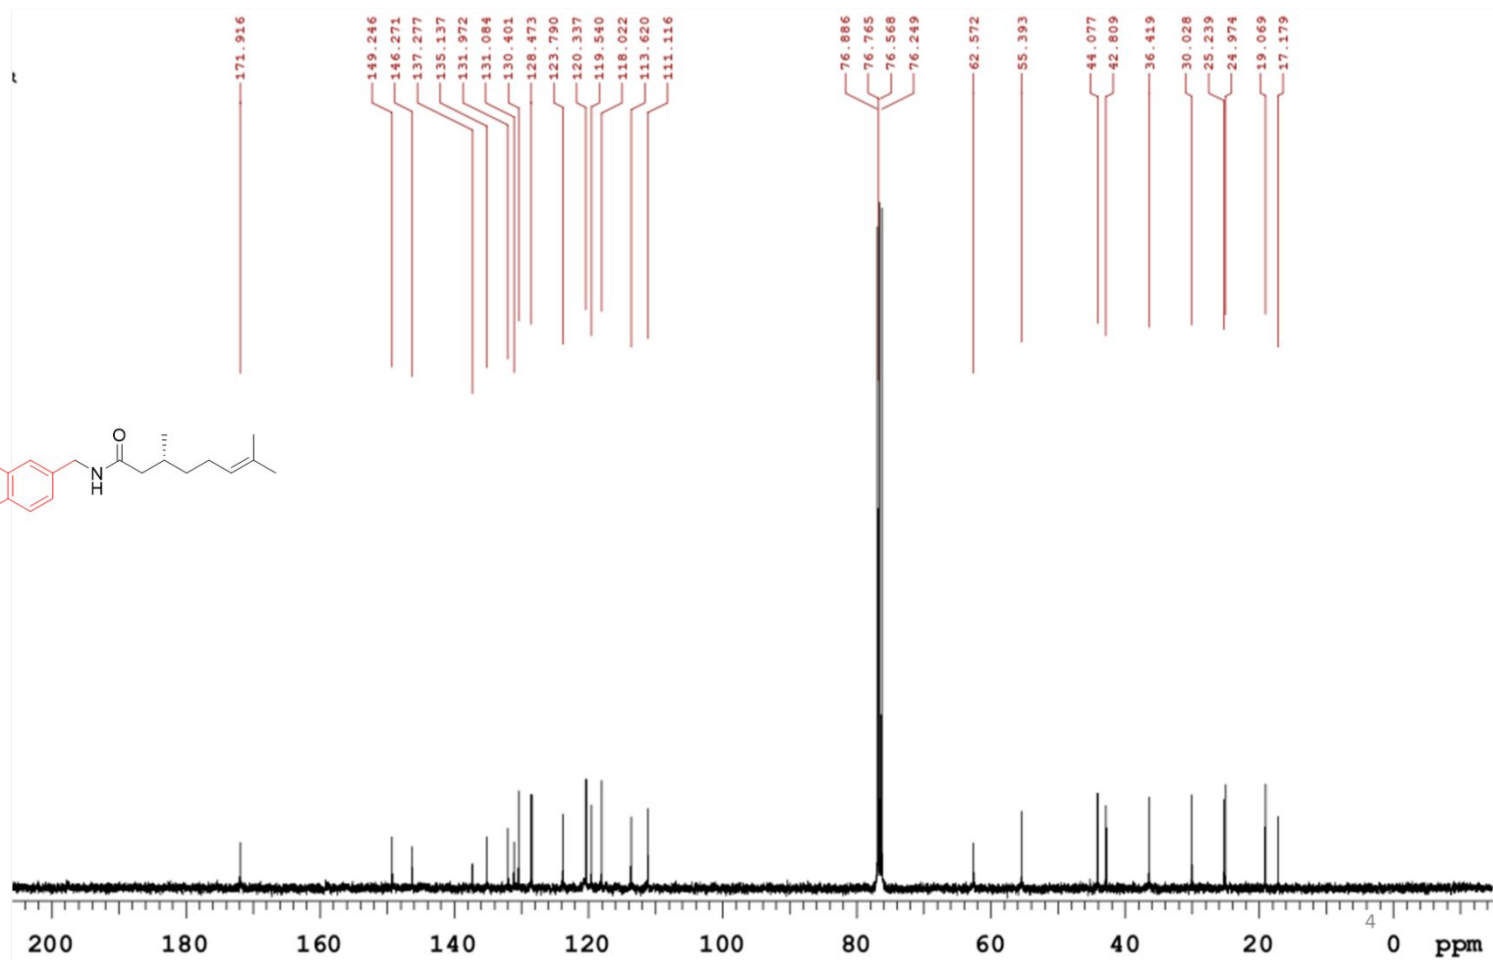

**Sample Information**

Sample Name : SA 4

Tray# : 1

Injection Volume : 0.5

Method File : MASS SCANN. 13APRIL2021.lcm

Date Processed : 12/16/2021 3:35:14 PM

Sample ID :

Vial# :

Data File :

Processed by :

:

: 85

: 16-12-2021 Jlcd26.lcd

: System Administrator

**LC-MS Spectra**  
**18c**

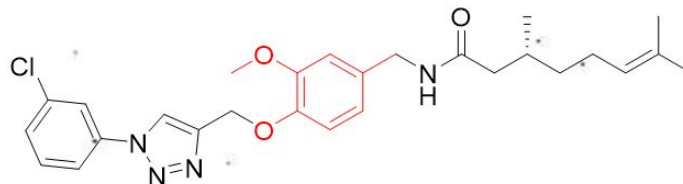

MS Spectrum

BG Mode:Averaged 0.515-0.979(61-115)\$EndIf\$ Segment 1 - Event 1

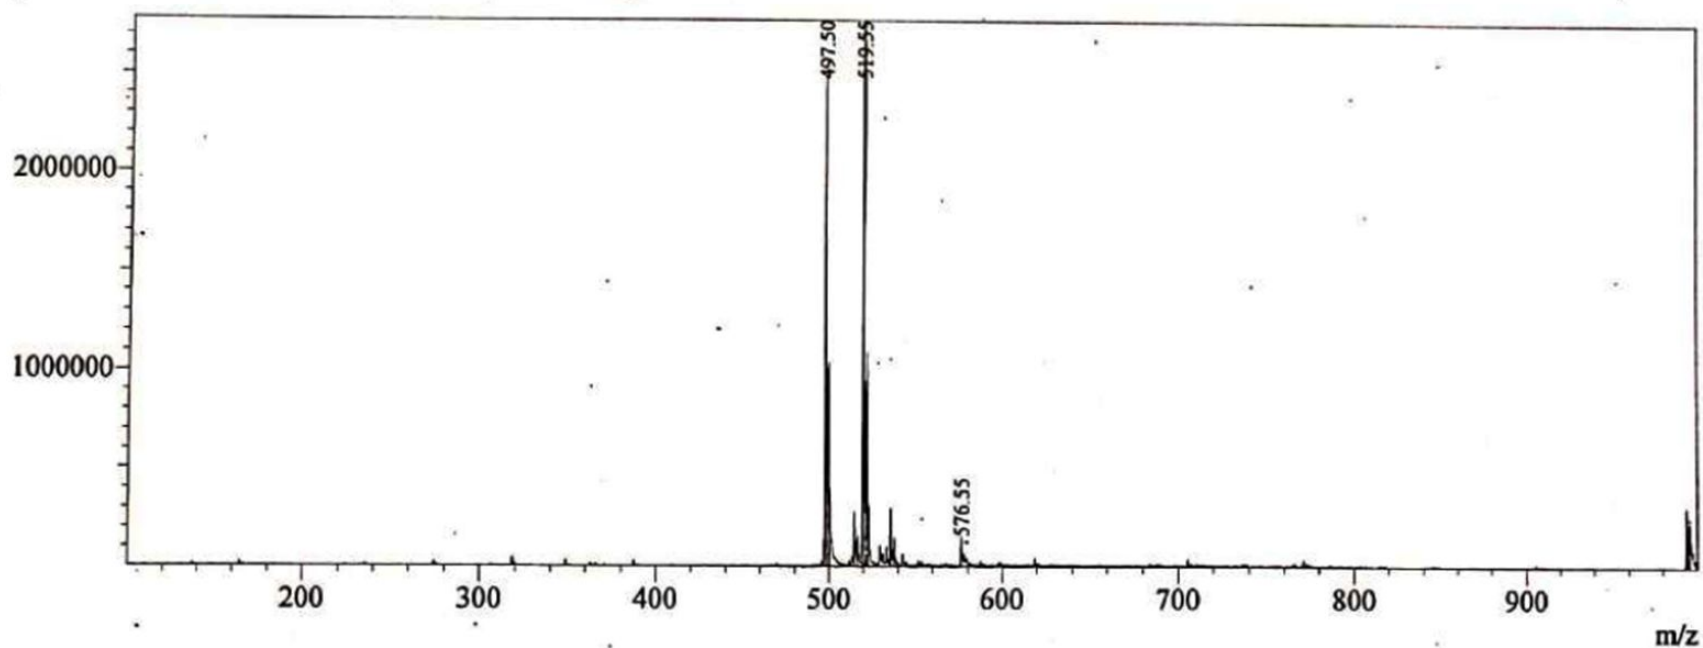

<sup>1</sup>H-NMR  
18d

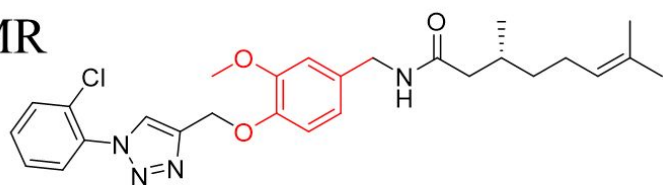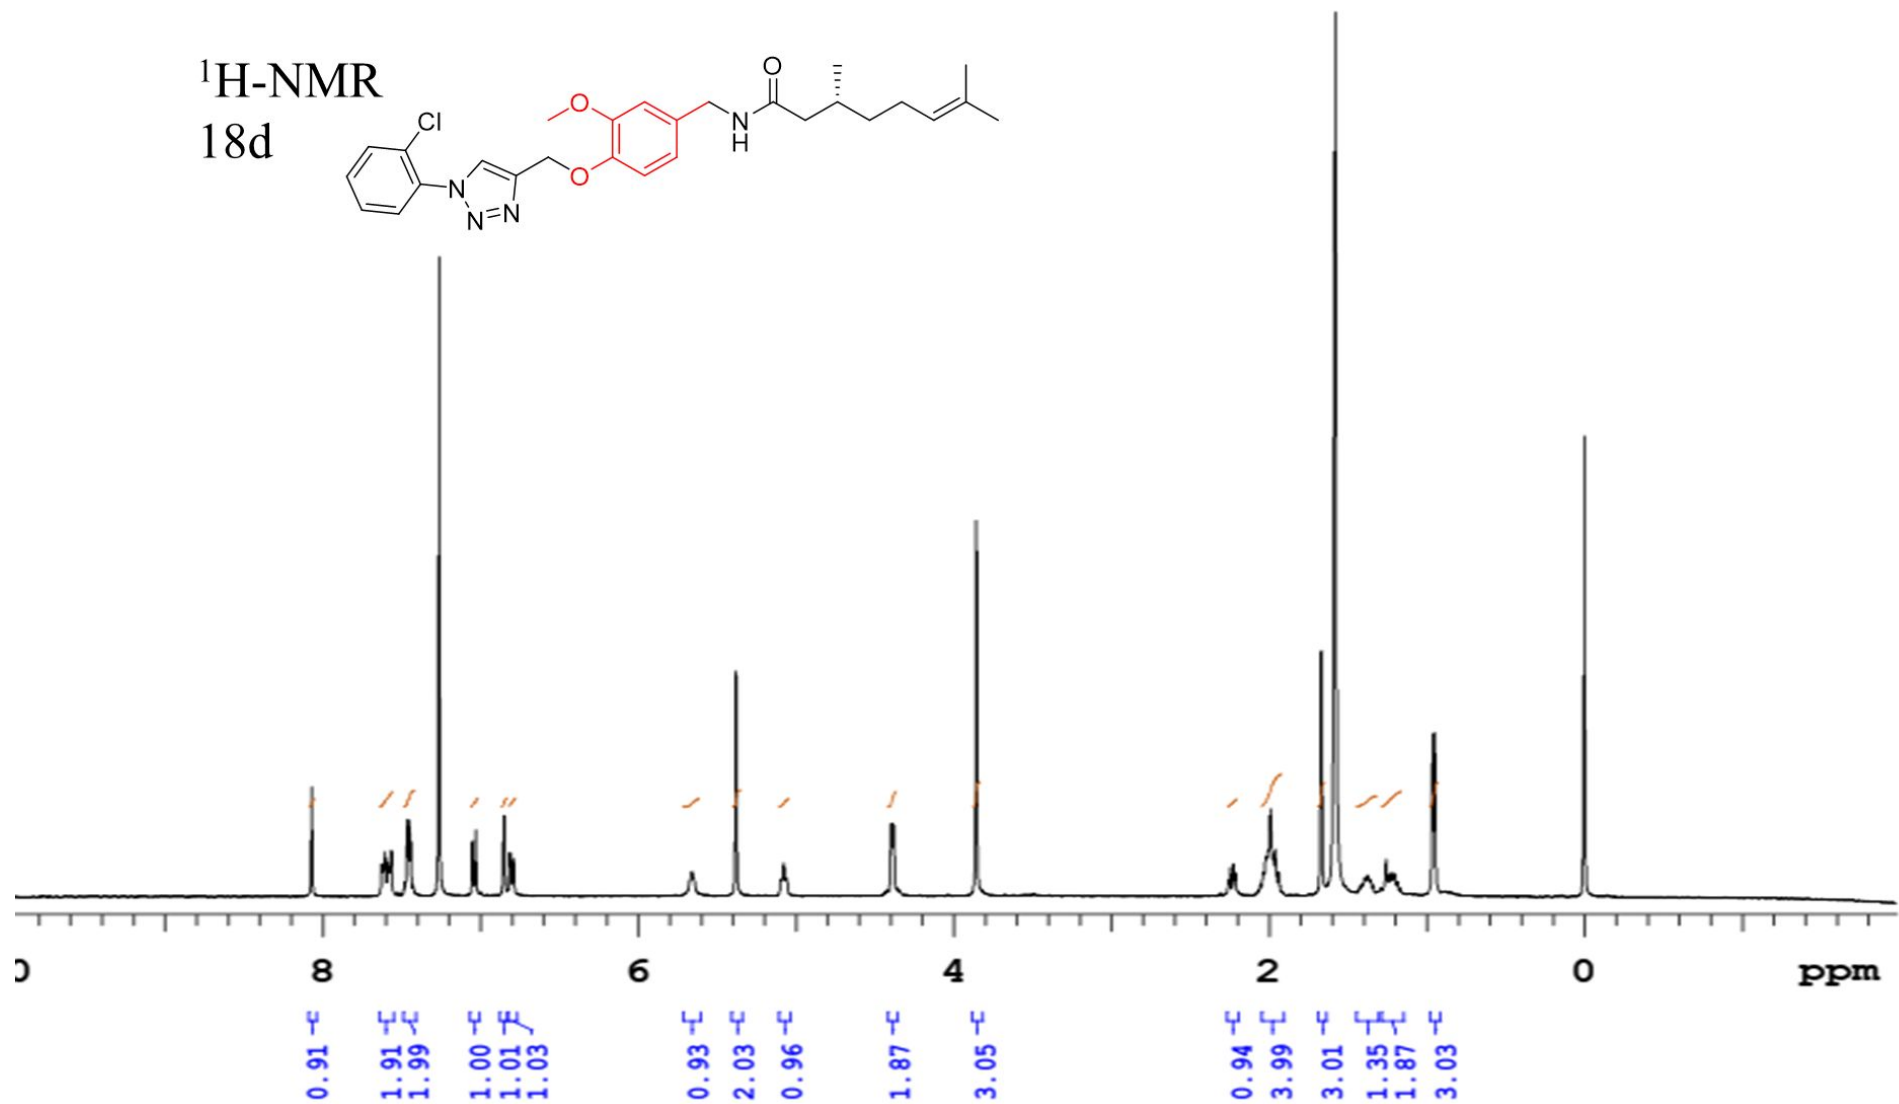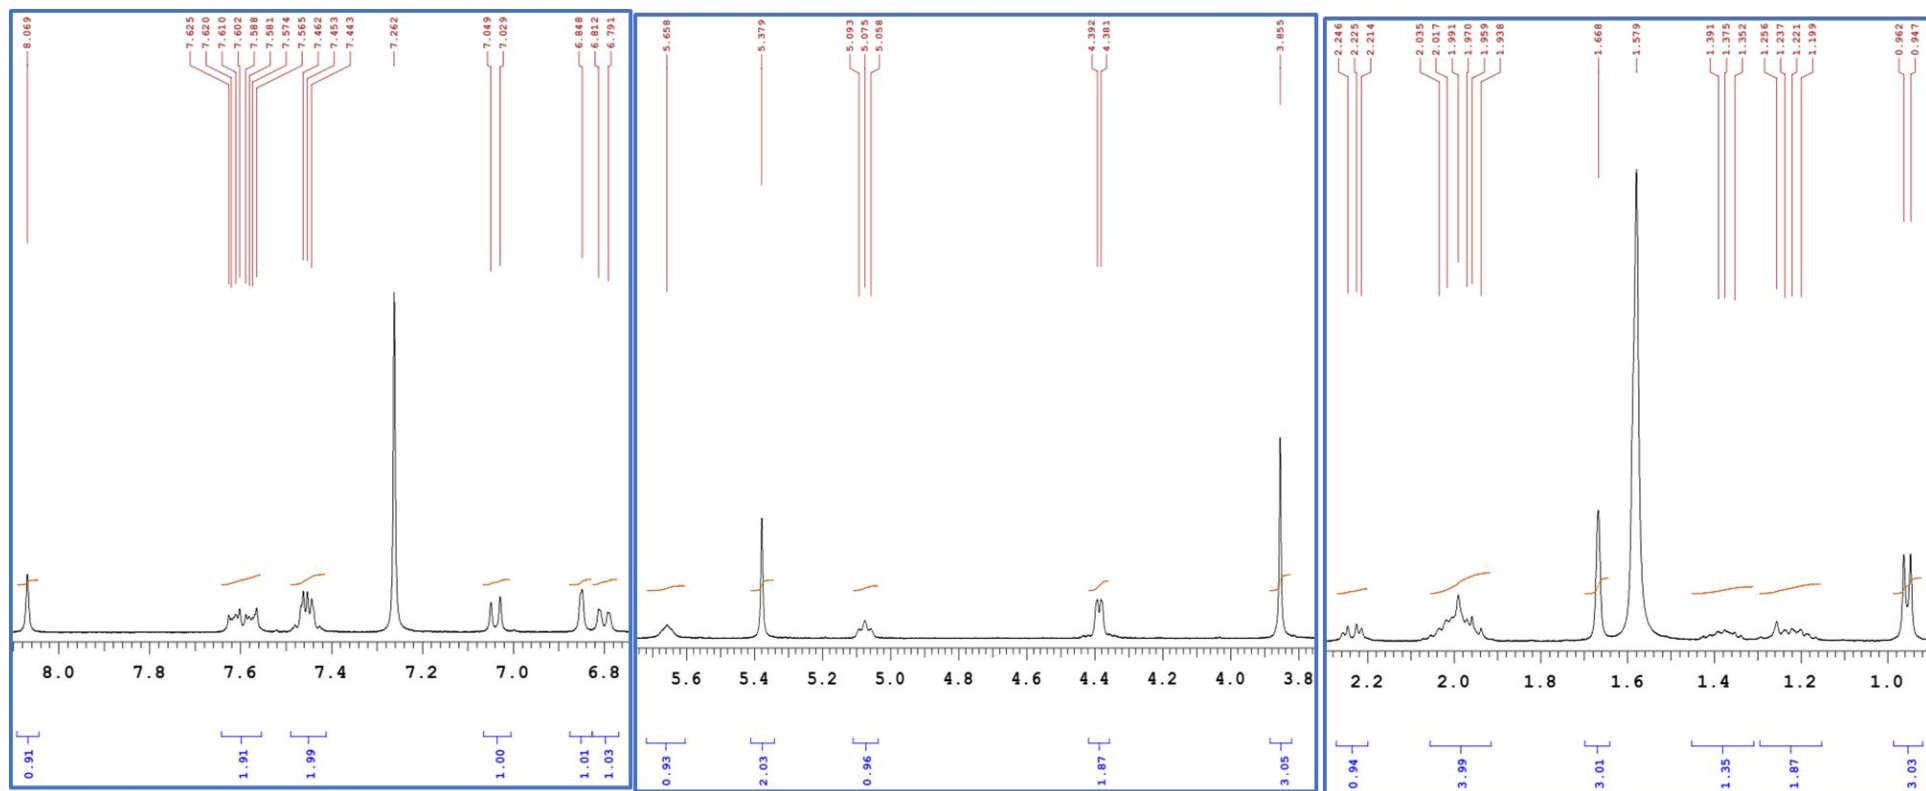

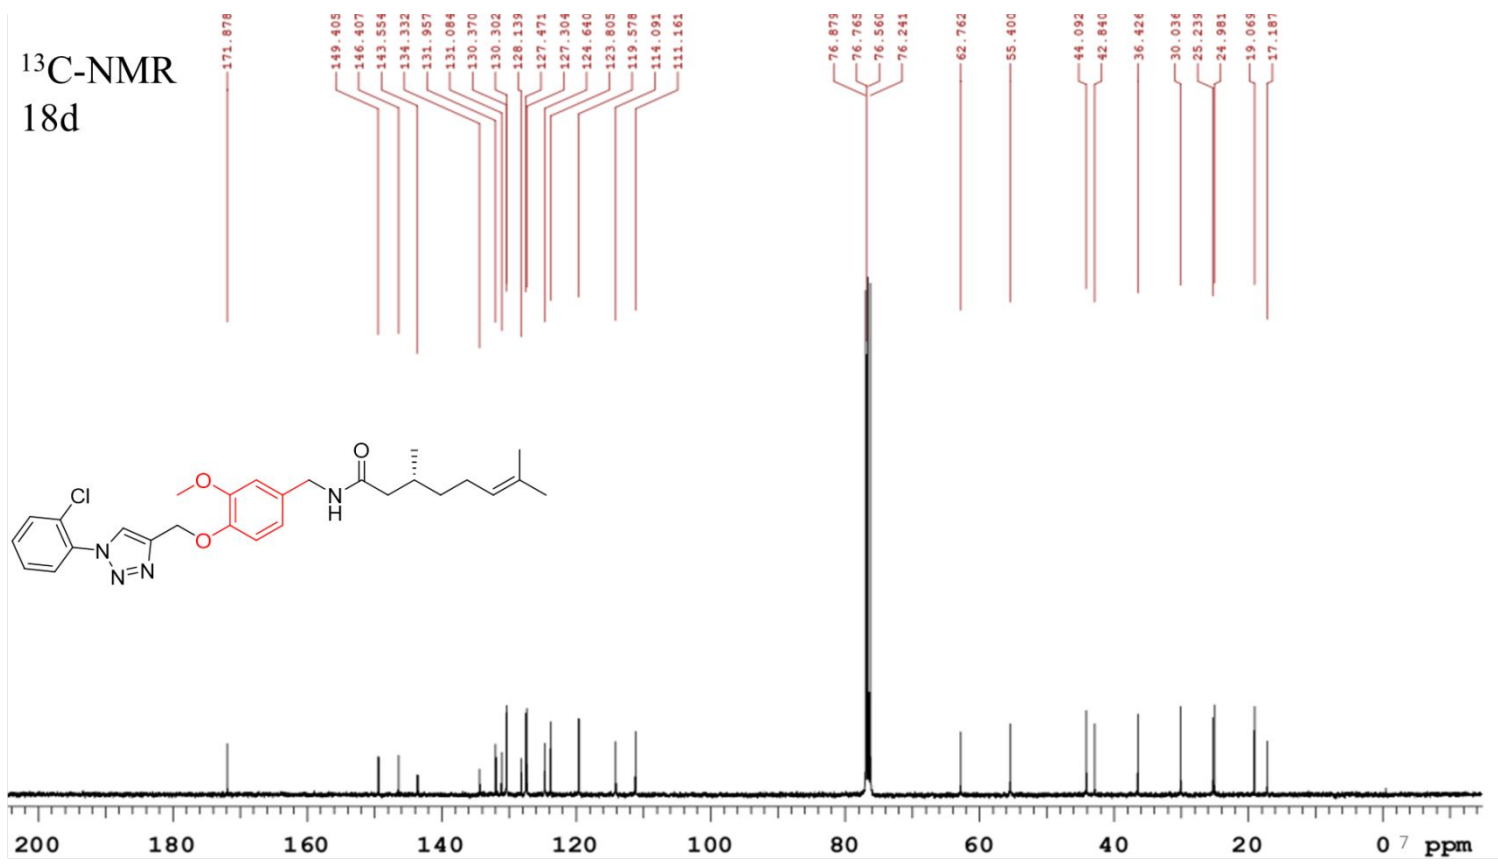

**Sample Information**

Sample Name : SA 5  
Tray# : 1  
Injection Volume : 0.5  
Method File : MASS SCANN 13APRIL2021.lcm  
Date Processed : 12/16/2021 3:37:00 PM

Sample ID :  
Vial# : 86  
Data File : 16-12-2021 Jlcd27.lcd

Processed by : System Administrator

**LC-MS Spectra**  
**18d**

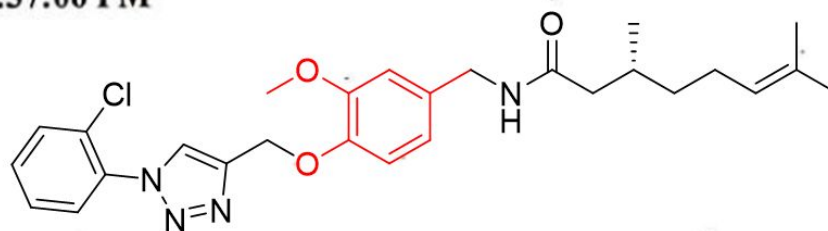

MS Spectrum

BG Mode:Averaged 0.464-0.979(55-115)\$EndIf\$ Segment 1 - Event 1

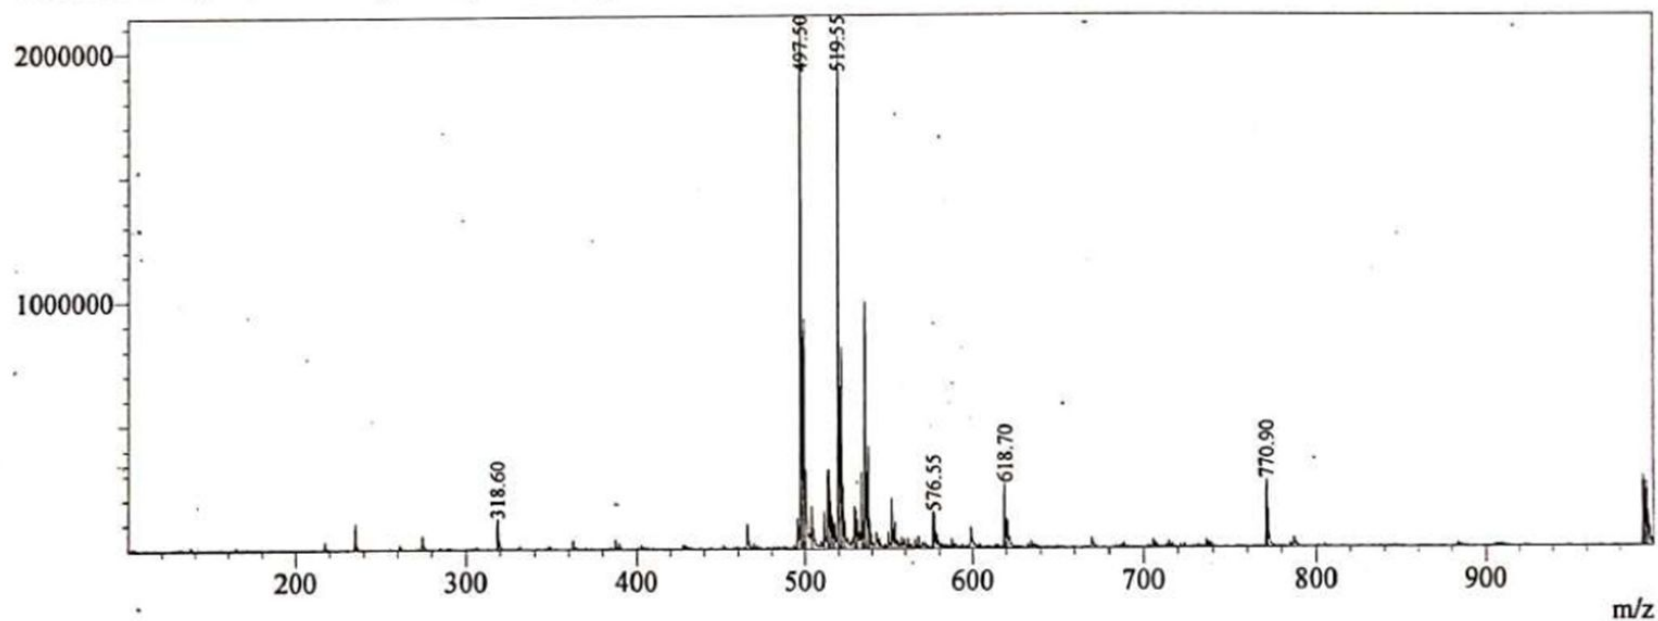

Sample code: SAD13

# <sup>13</sup>H-NMR

VARIAN 400MHz NMR

Solvent: CDC13

Date: Sep 08 2021

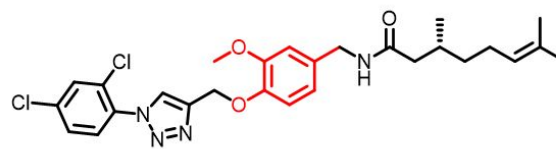

18e

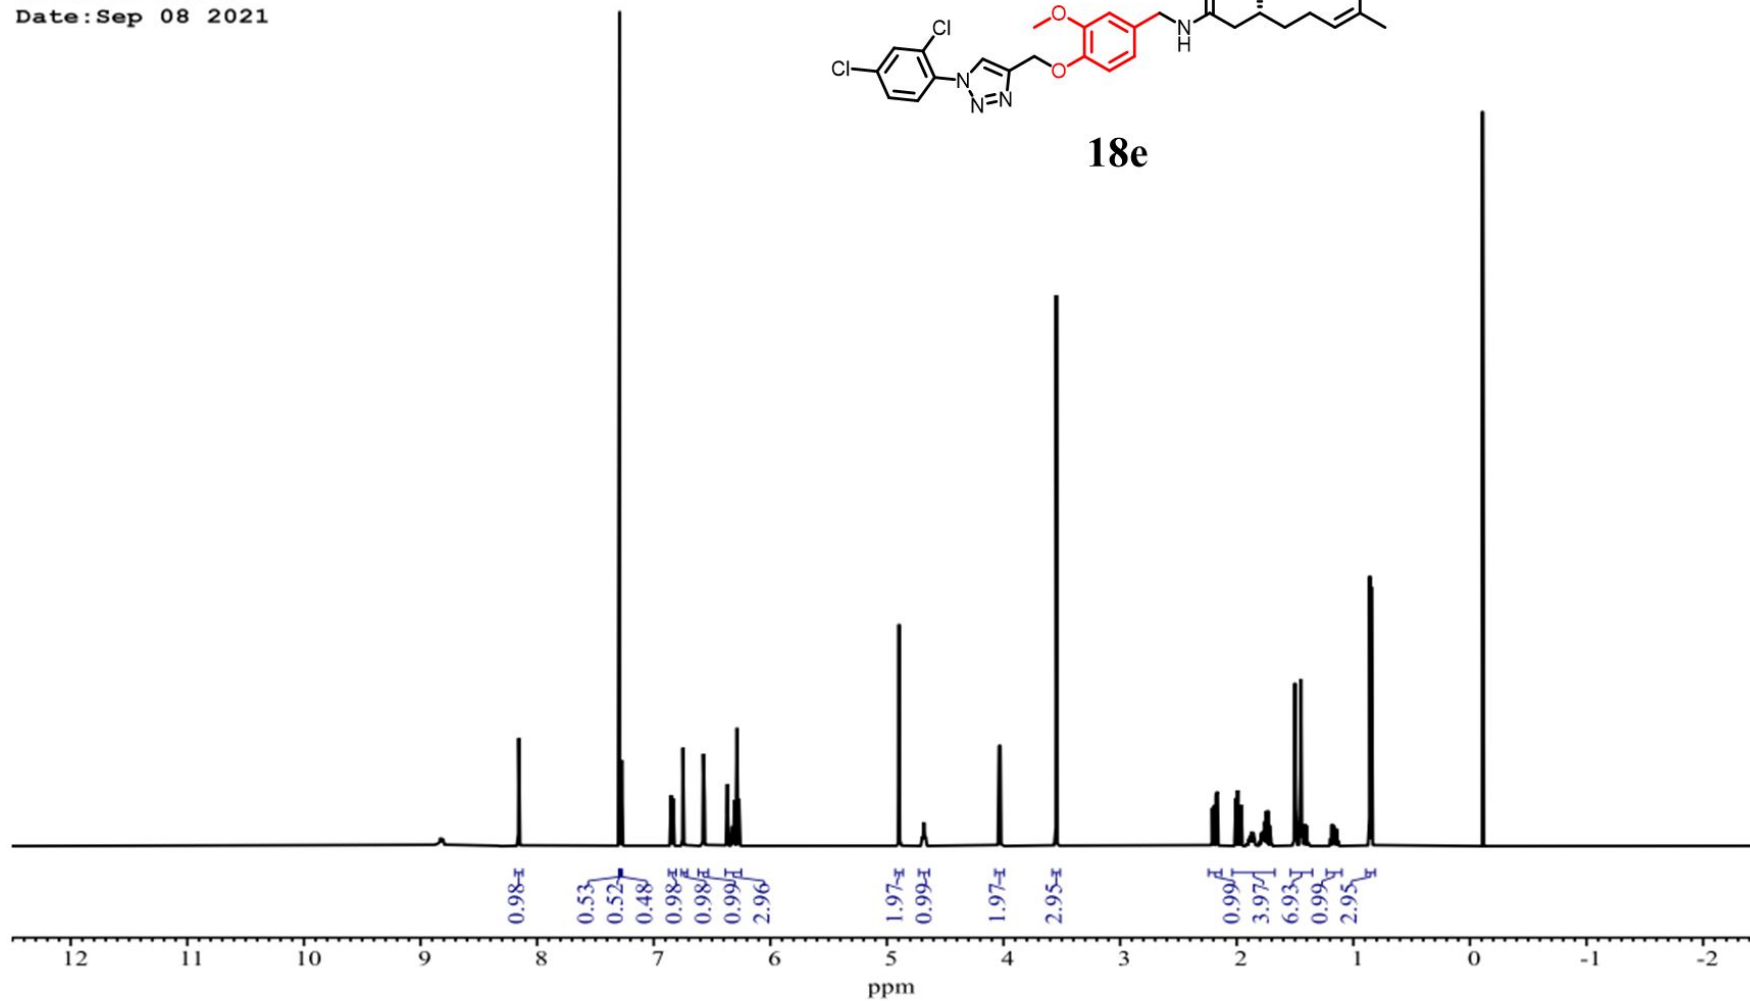

Plotname: SAD13\_PROTON\_01\_plot01

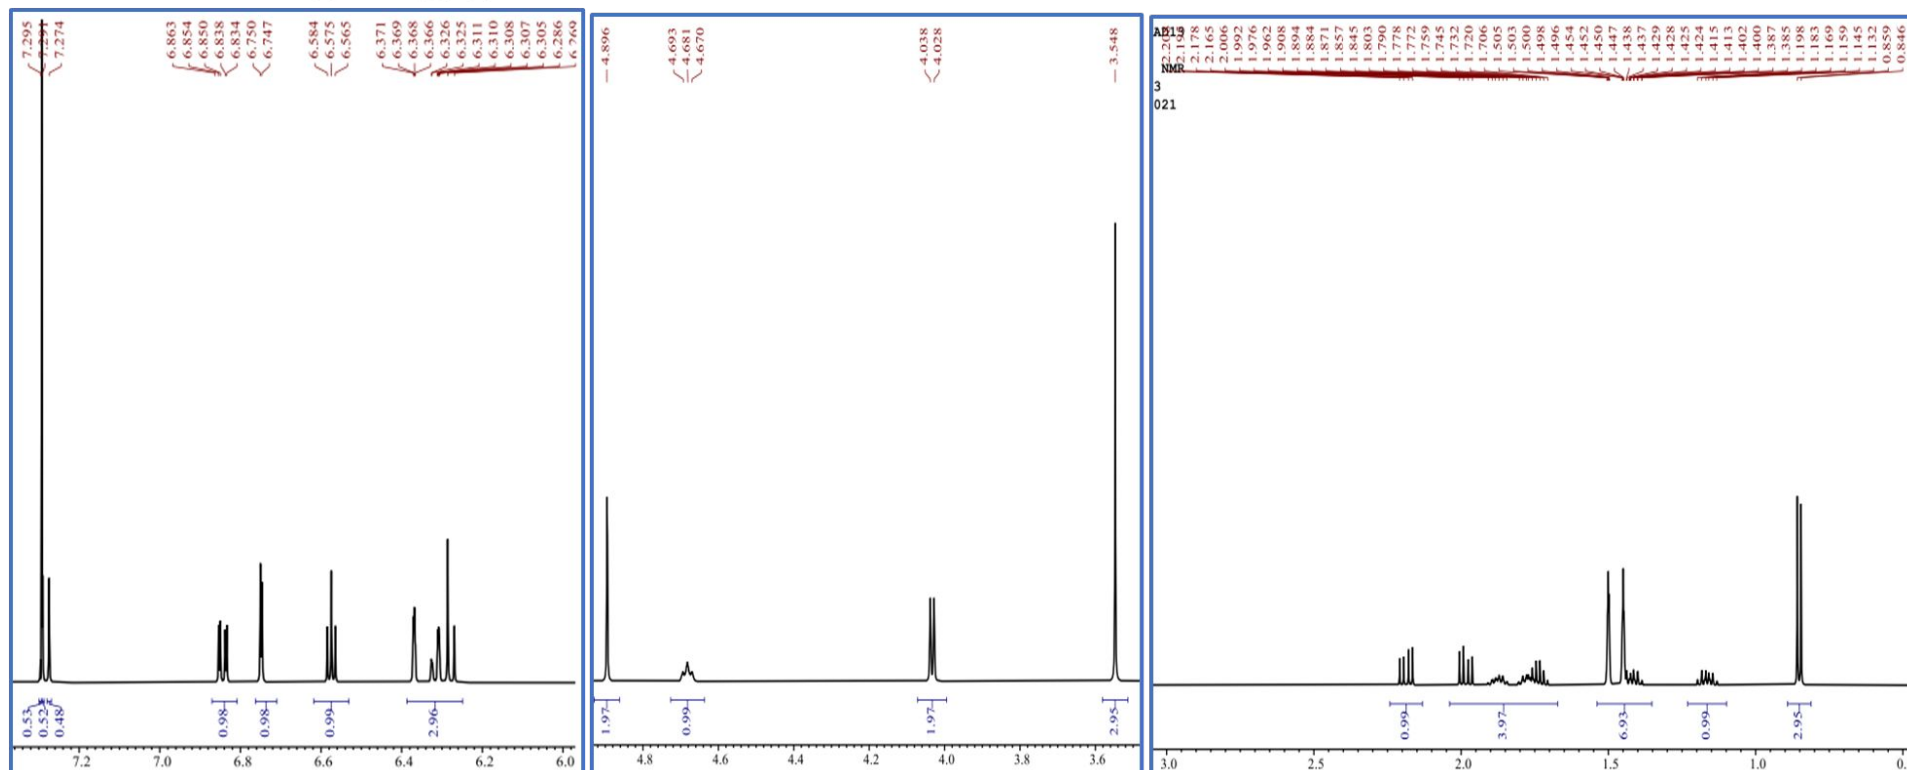

<sup>13</sup>C-NMR  
18e

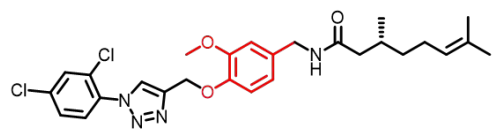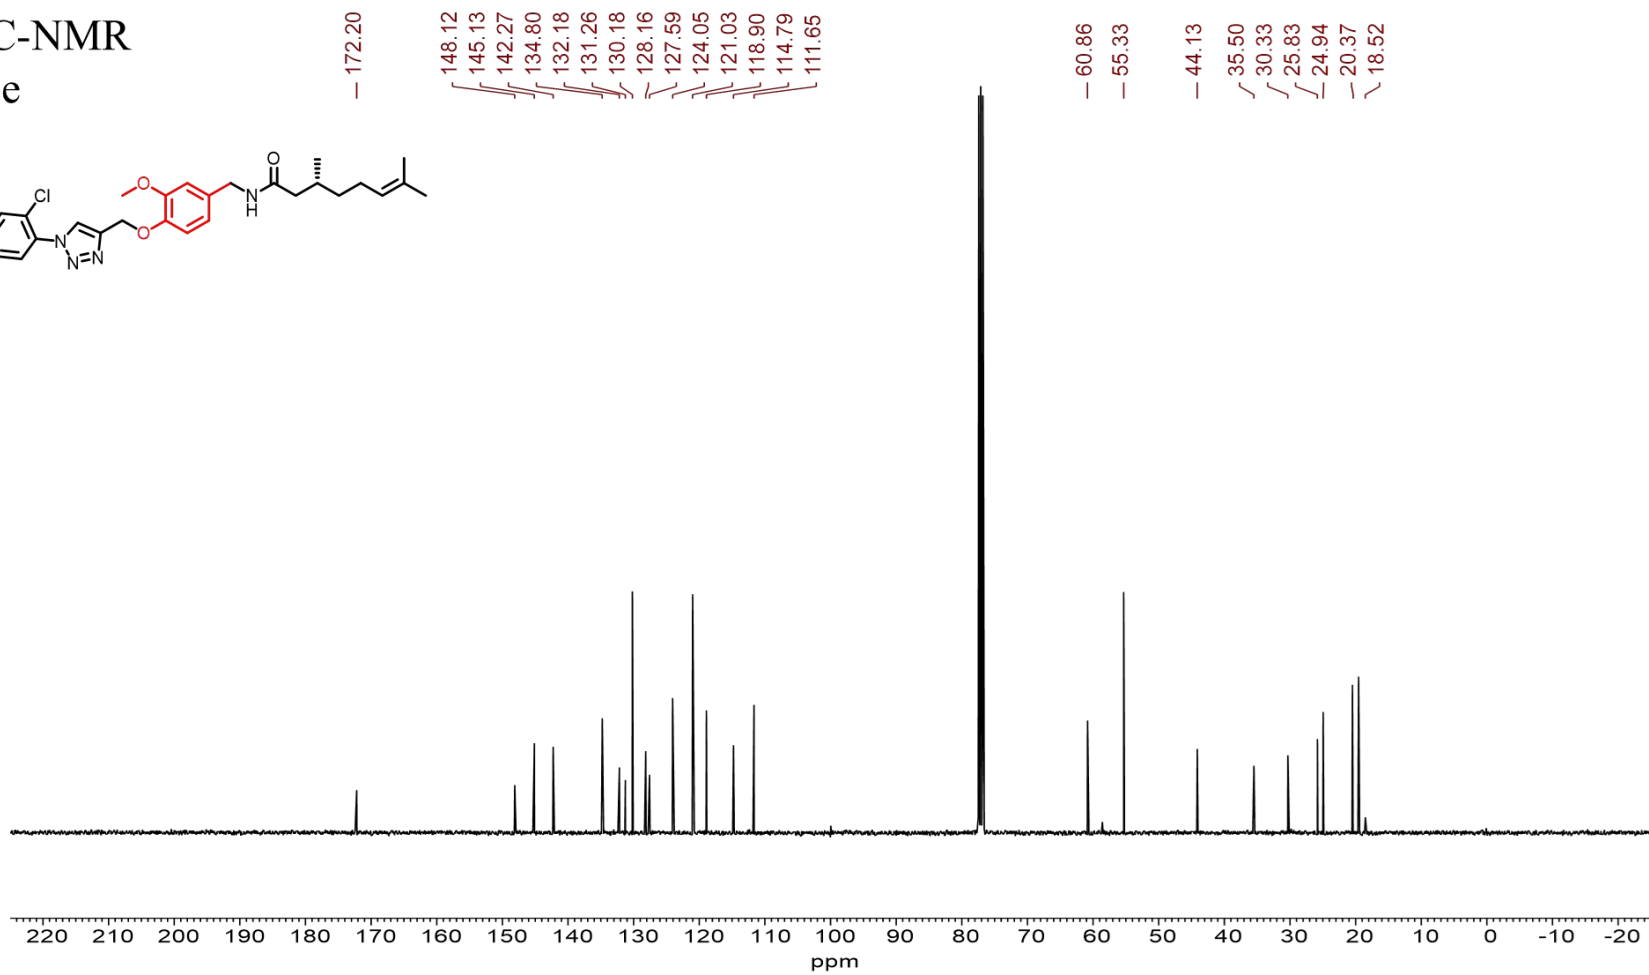

**Sample Information**

Sample Name : SA 13

Tray# : 1

Injection Volume : 0.5

Method File : MASS SCANN 13APRIL2021.lcm

Date Processed : 12/20/2021 1:25:40 PM

Sample ID :

Vial# : 19

Data File : 20-12-2021 Jled19.lcd

Processed by : System Administrator

**LC-MS spectra  
18e**

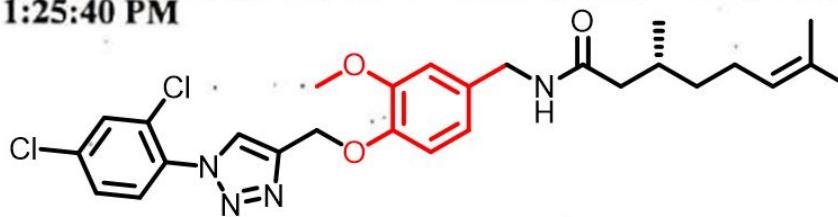

MS Spectrum

BG Mode: Averaged 0.412-0.961(49-113) Segment 1 - Event 1

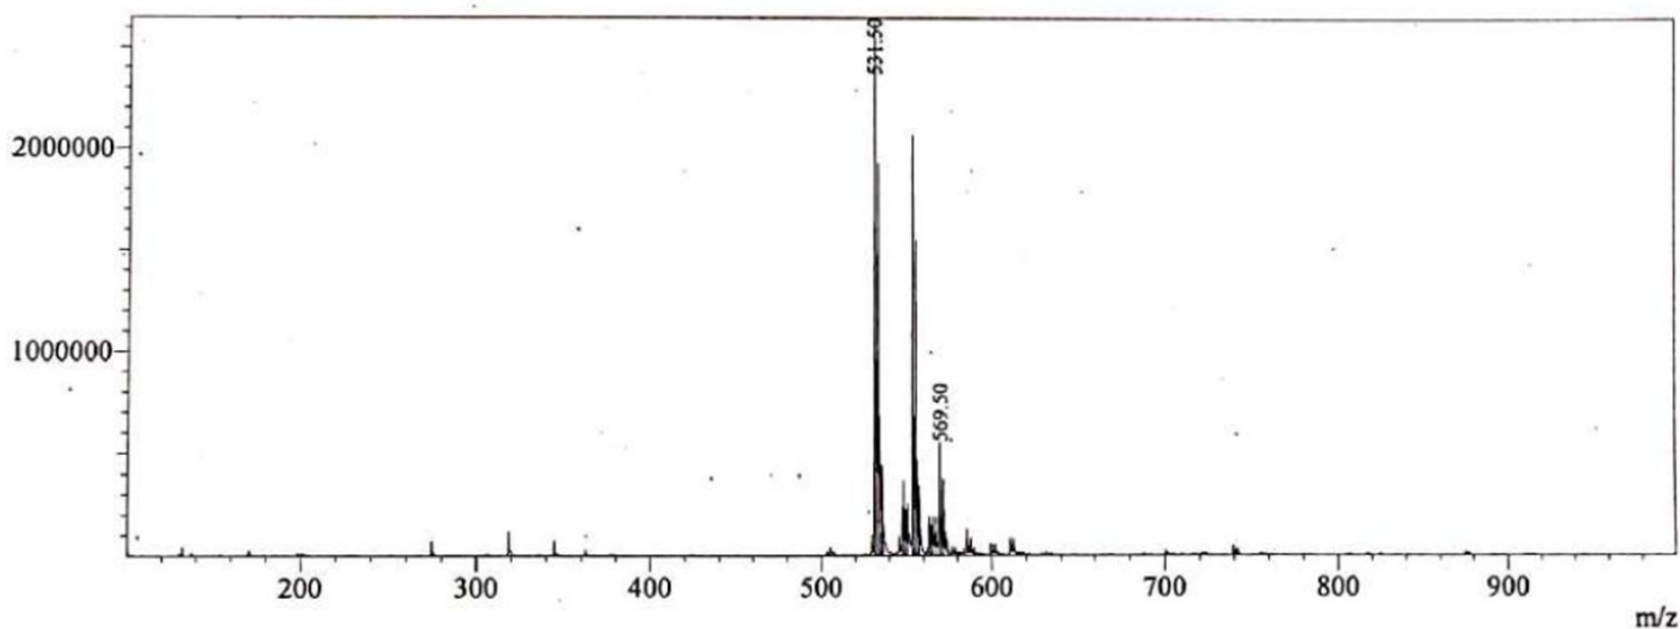



Sample code:SAD6

VARIAN 400MHz NMR

Solvent: CDCl3

Date:Jul 10 2021

# <sup>1</sup>H-NMR 18f

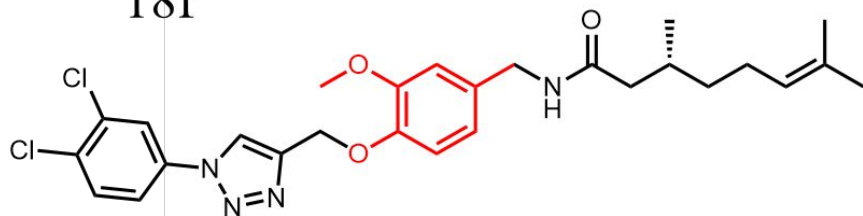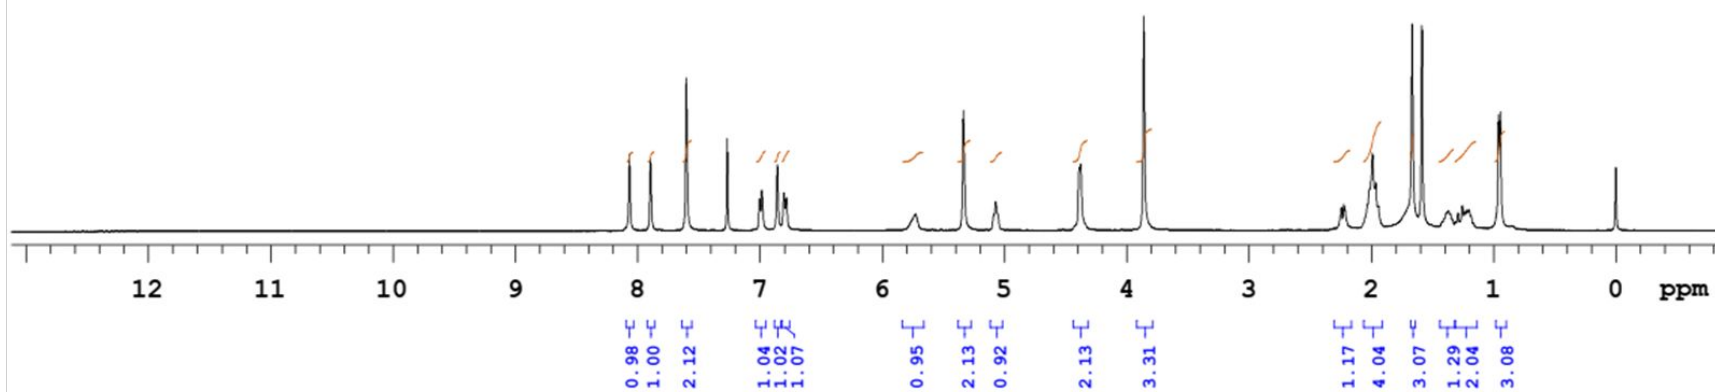

Plotname: SAD6\_PROTON\_01\_plot01

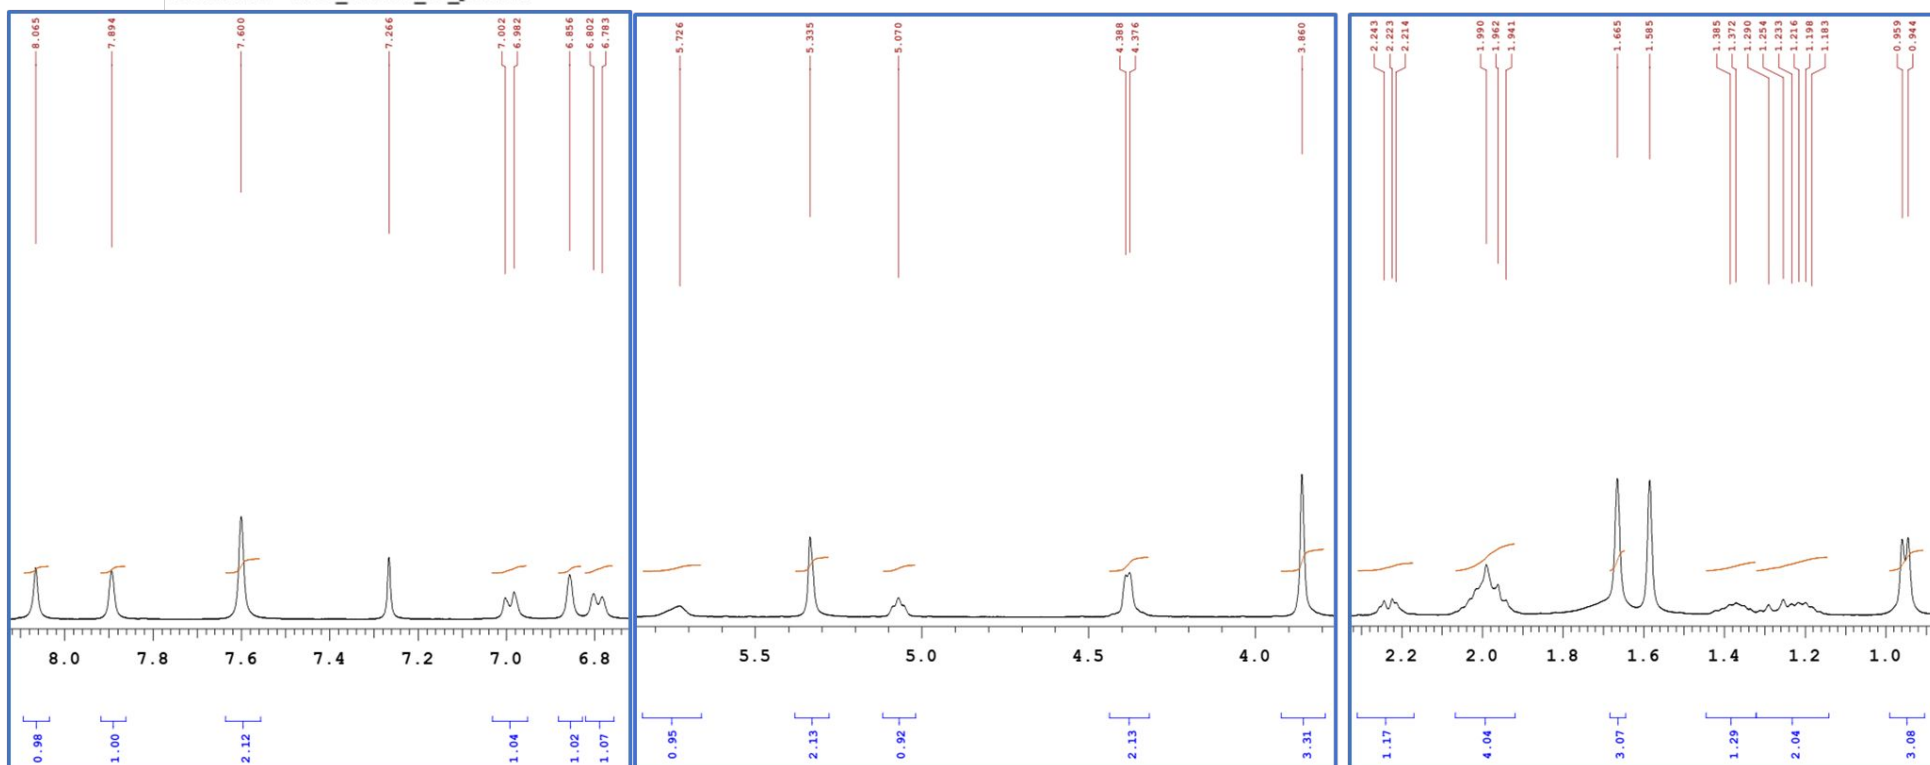

<sup>13</sup>C-NMR  
18f

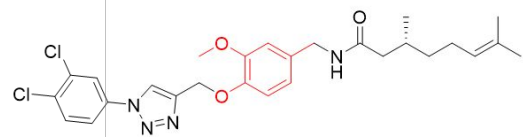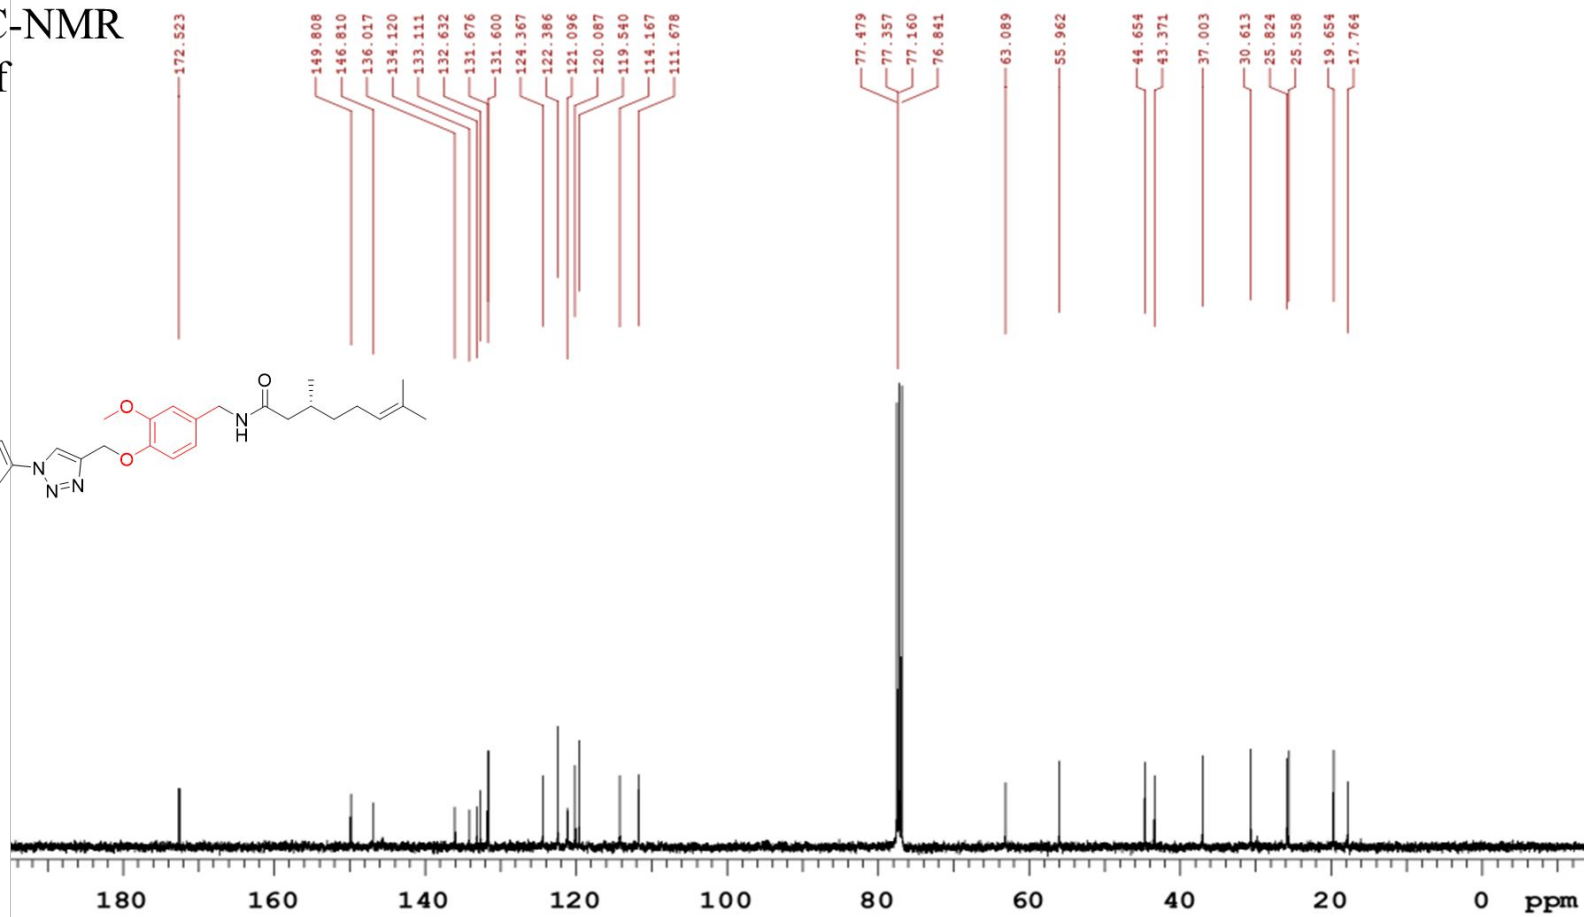

# LC-MS spectra 18f

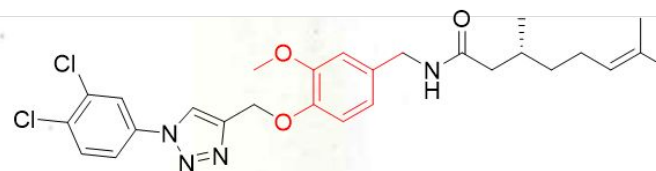

## Sample Information

Sample Name : SA 6  
Tray# : 1  
Injection Volume : 0.5  
Method File : MASS SCANN 13APRIL2021.lcm  
Date Processed : 12/16/2021 3:38:48 PM

Sample ID :  
Vial# :  
Data File :  
Processed by :

: 87  
: 16-12-2021 Jlcd28.lcd  
: System Administrator

MS Spectrum  
BG Mode: Averaged 0.429-0.979(51-115) Segment 1 - Event 1

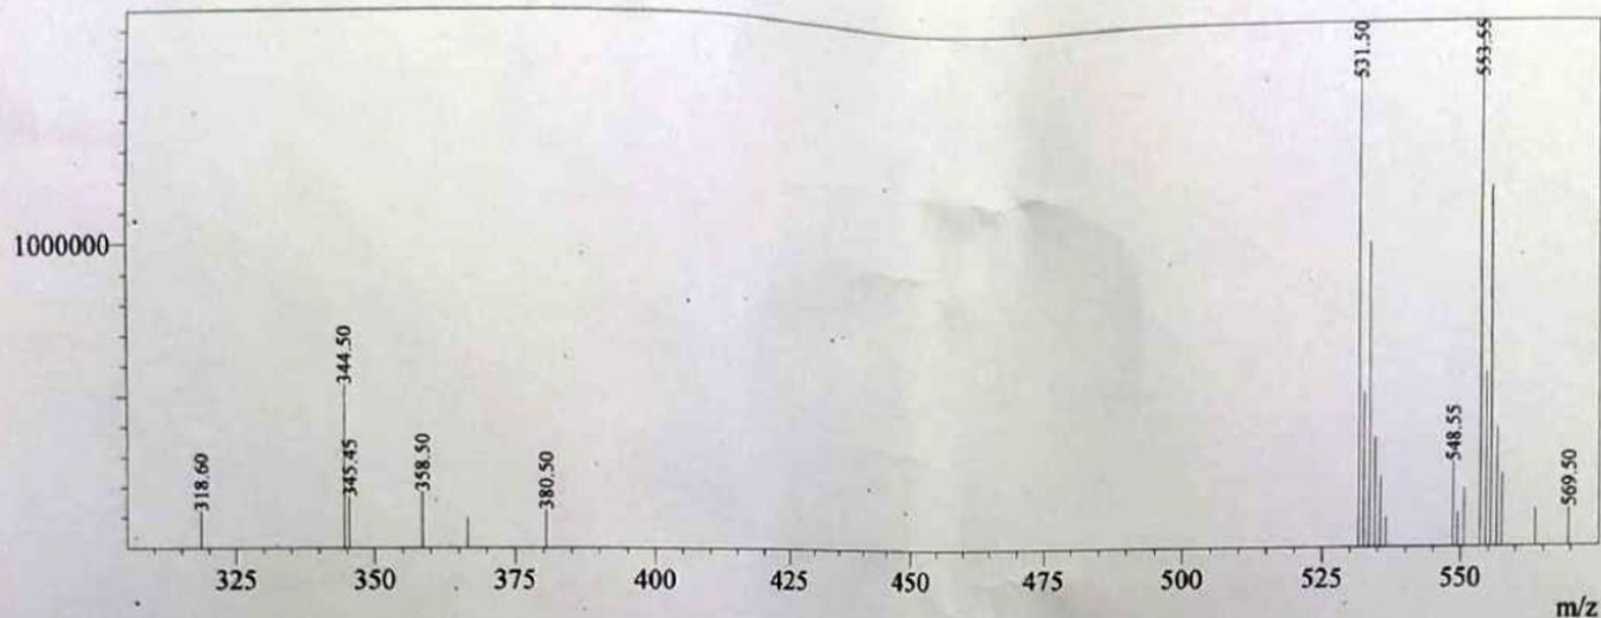

<sup>1</sup>H-NMR

18g

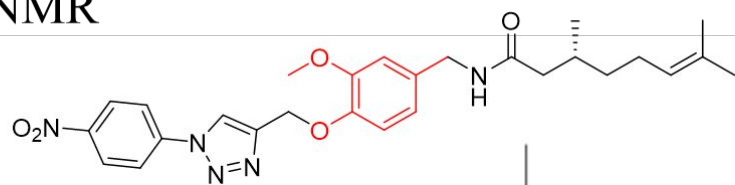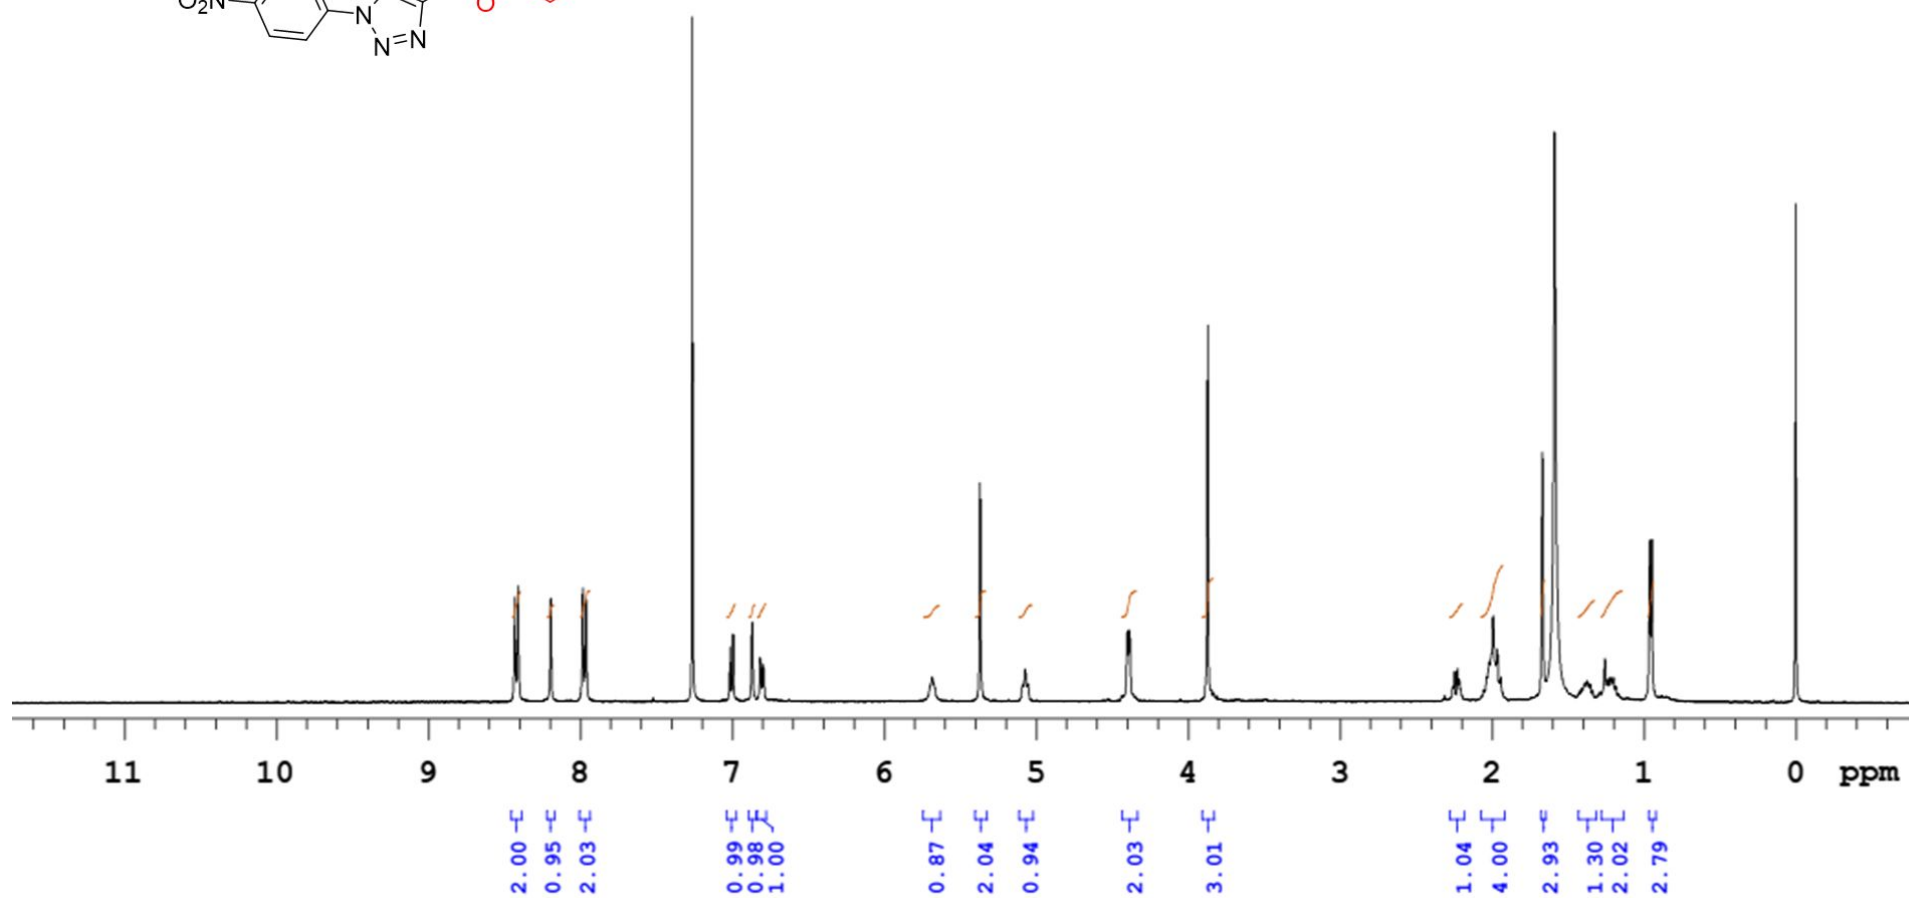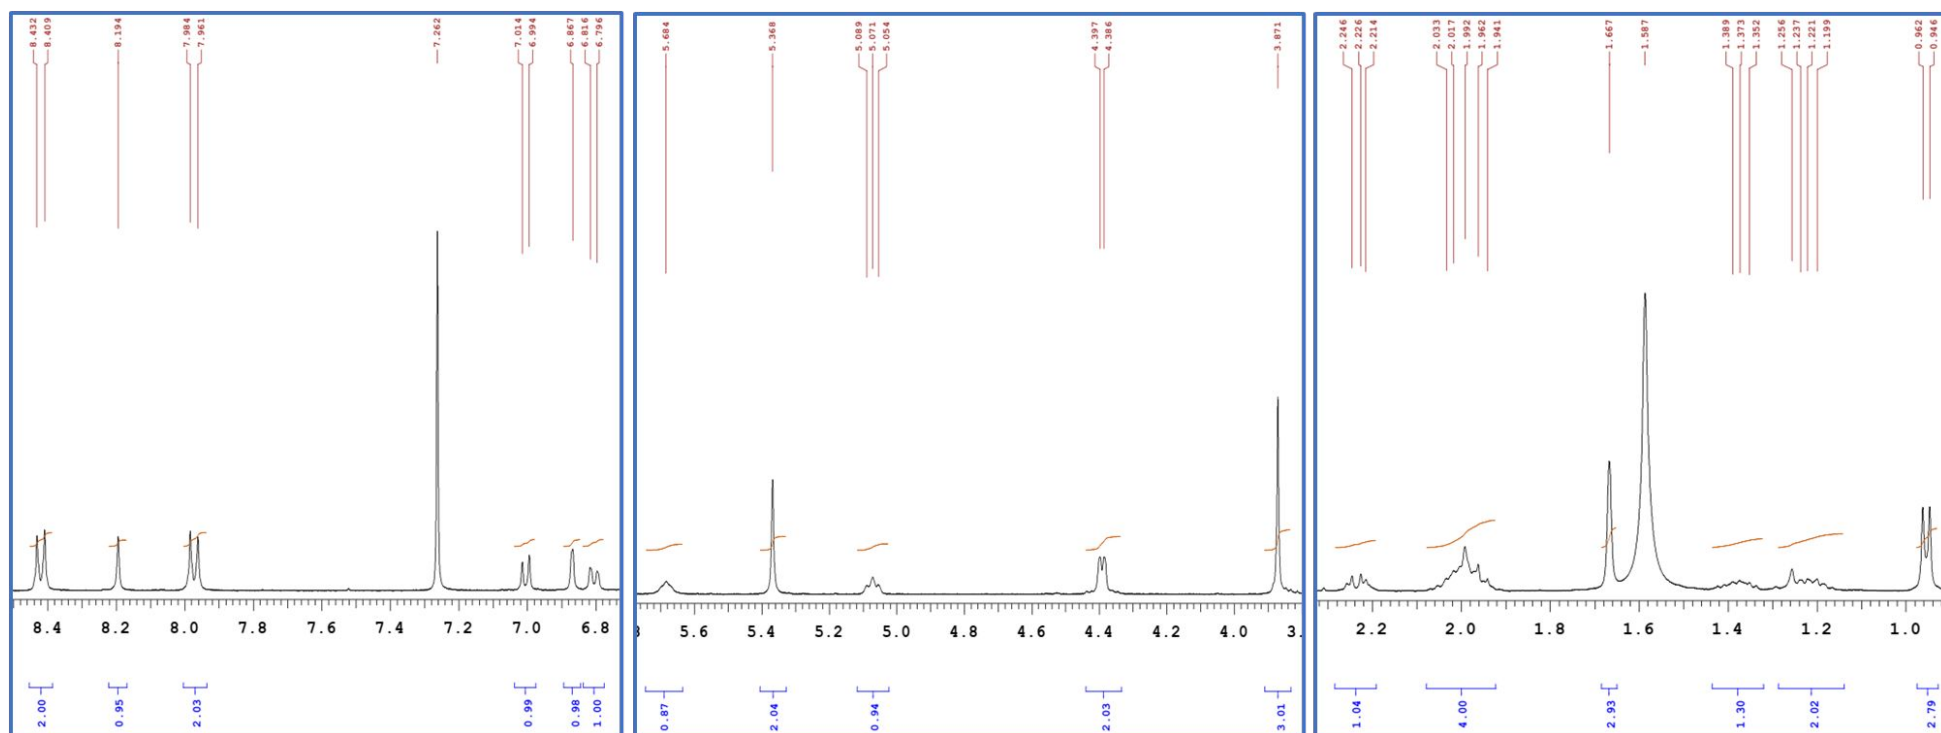

<sup>13</sup>C-NMR  
18g

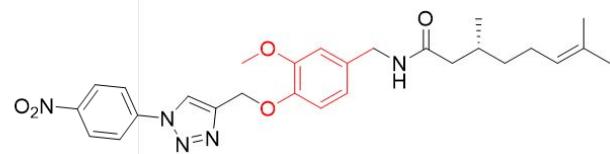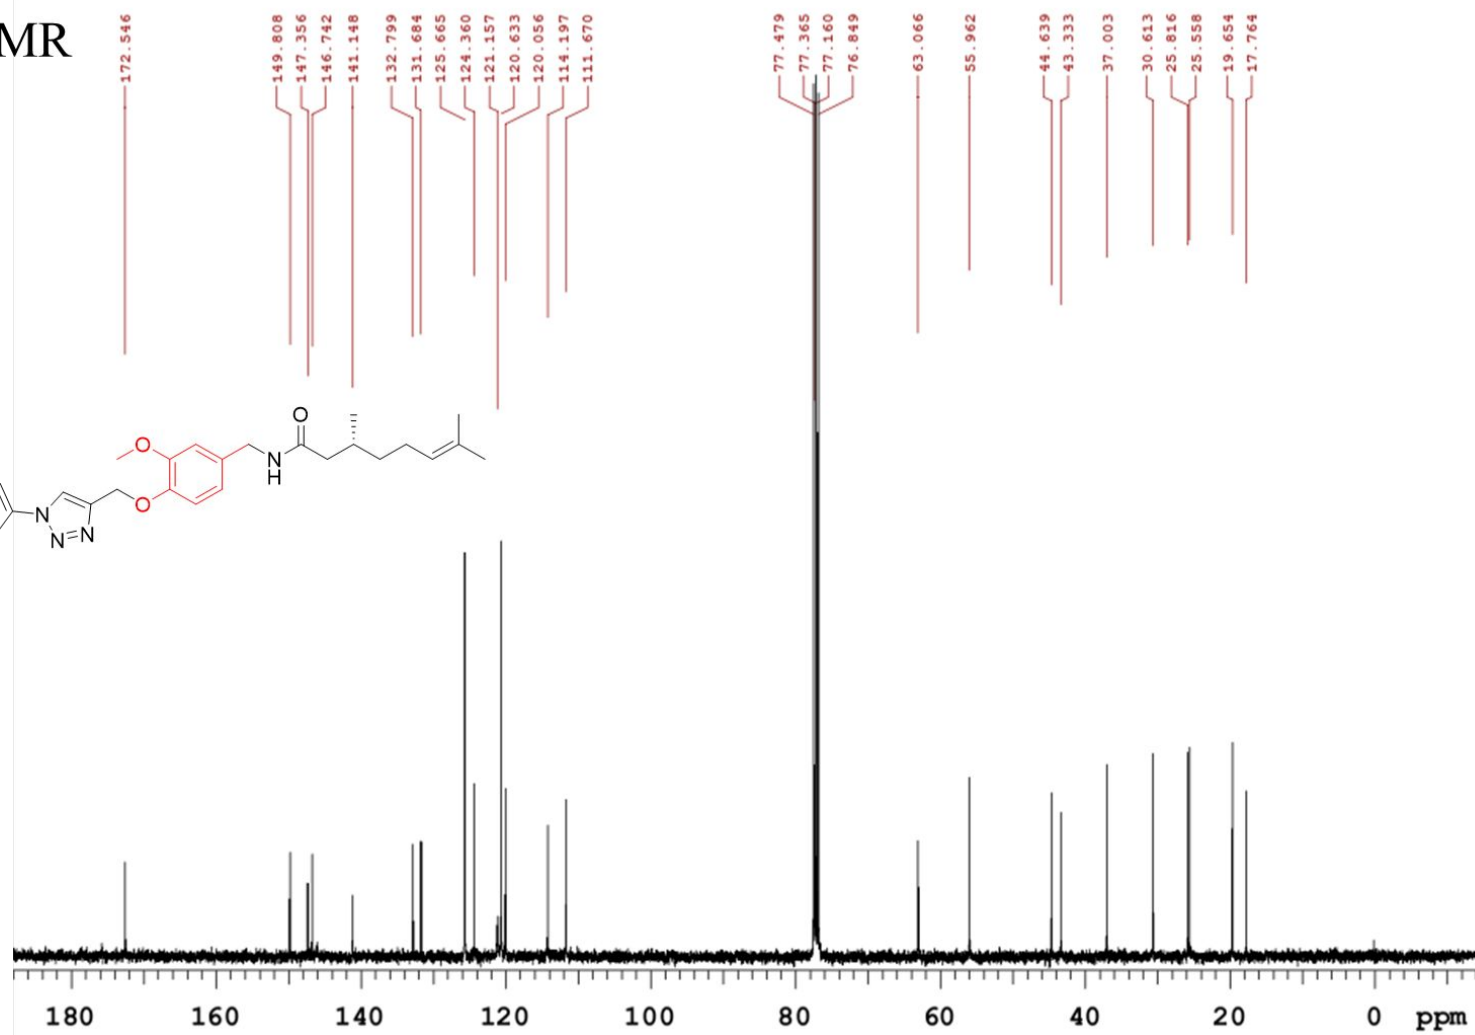

**Sample Information**

Sample Name : SA 7  
Tray# : 1  
Injection Volume : 0.5  
Method File : MASS SCANN 13APRIL2021.lcm  
Date Processed : 12/16/2021 3:40:36 PM

Sample ID :  
Vial# : 88  
Data File : 16-12-2021 Jlcd29.lcd

Processed by : System Administrator

**LC-MS spectra**  
**18g**

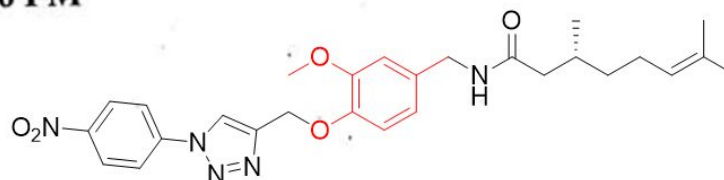

**MS Spectrum**

BG Mode:Averaged 0.481-0.927(57-109)\$EndIf\$ Segment 1 - Event 1

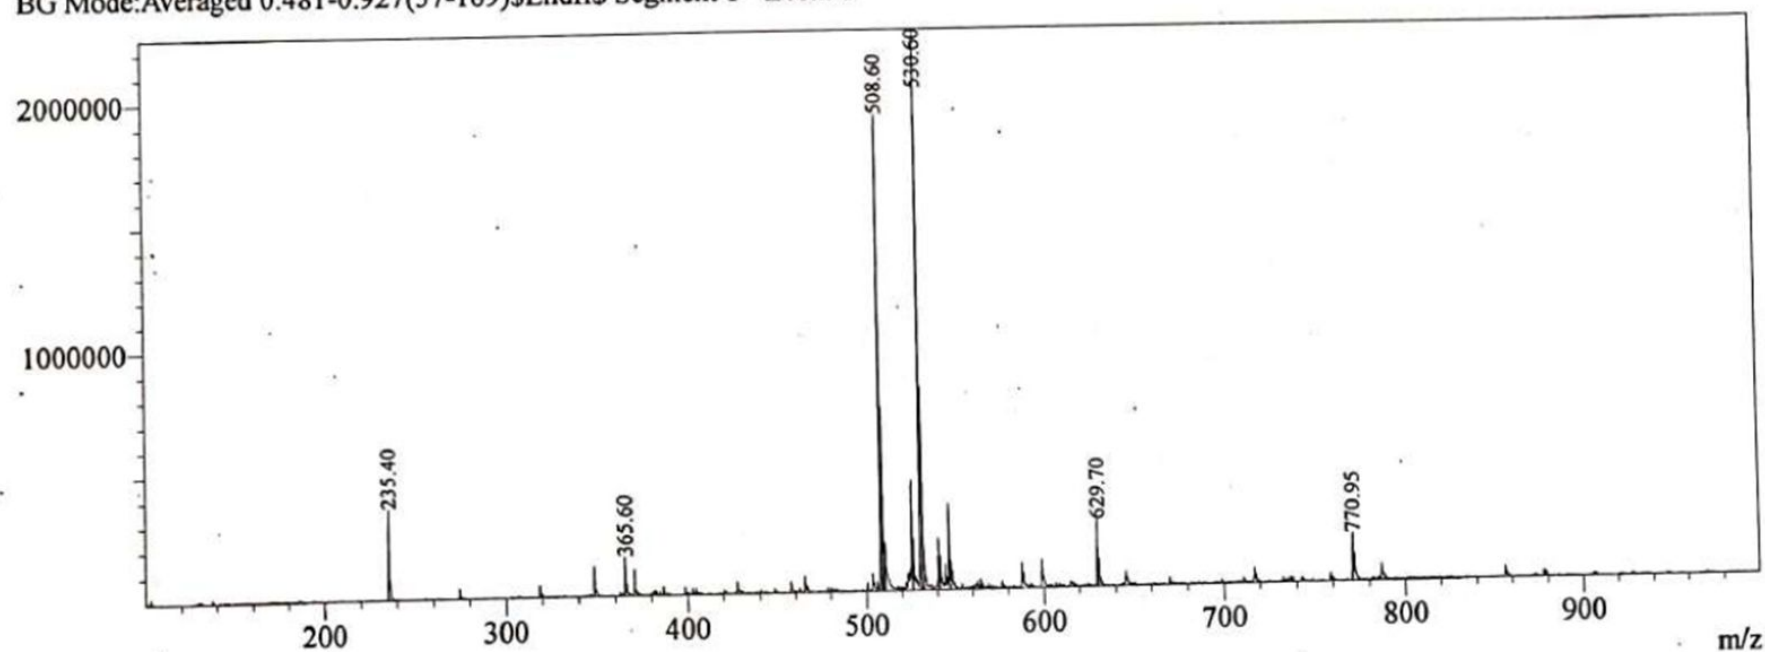

<sup>1</sup>H-NMR  
18h

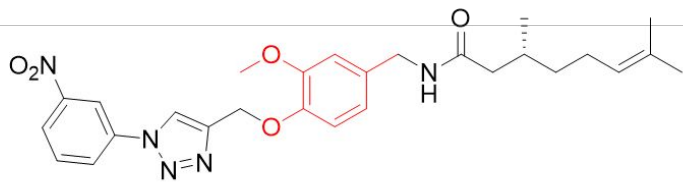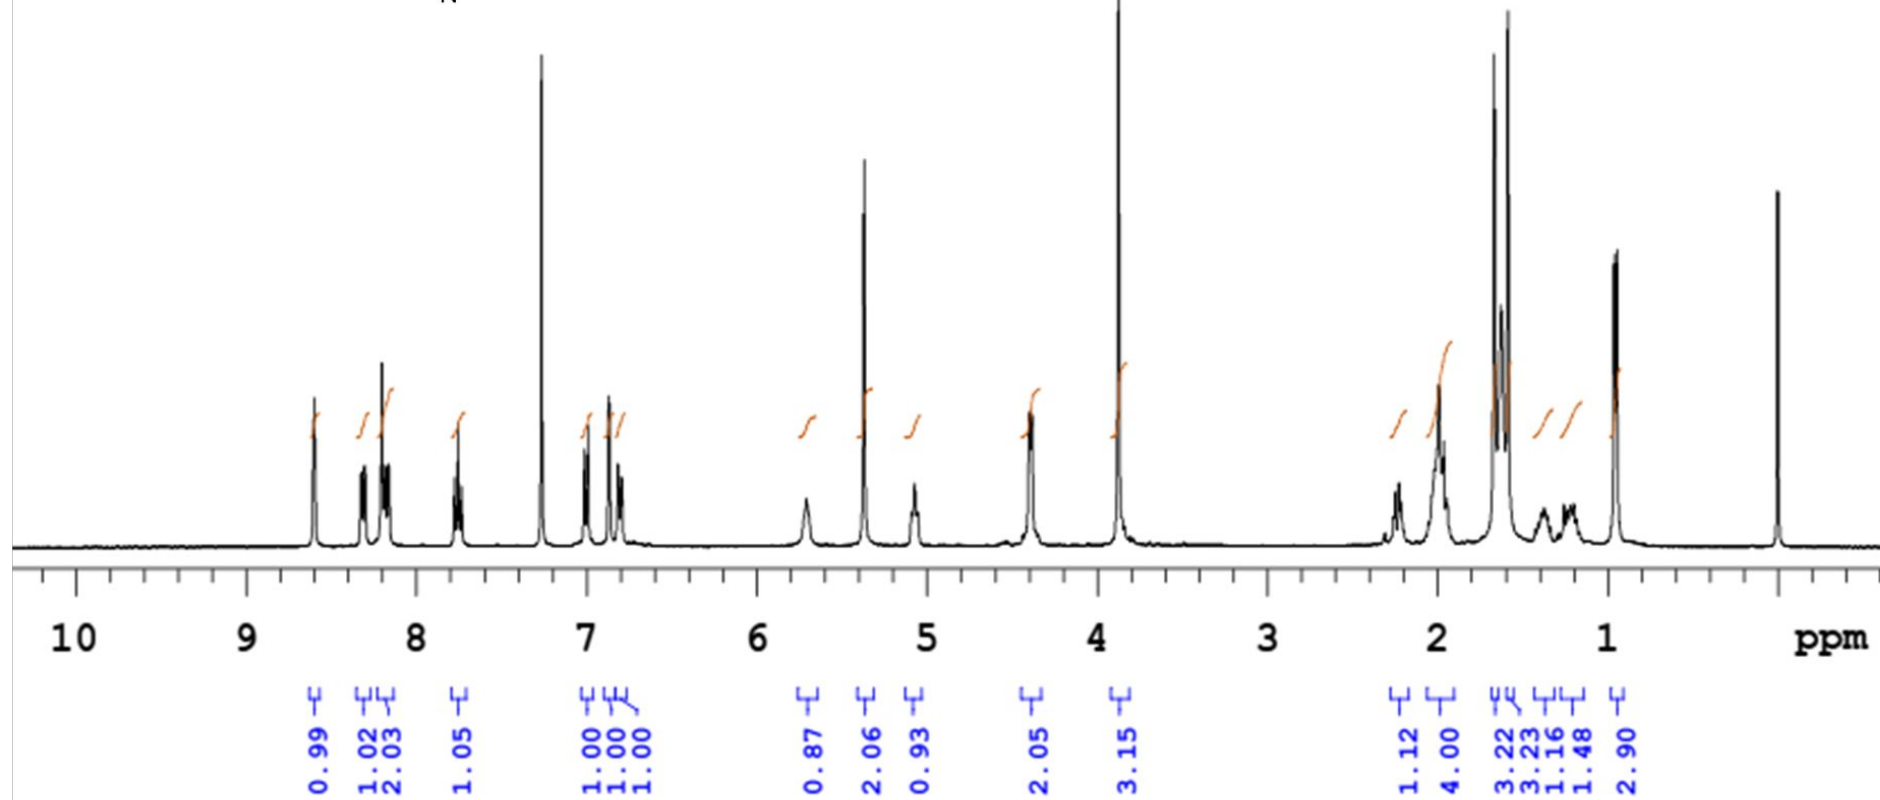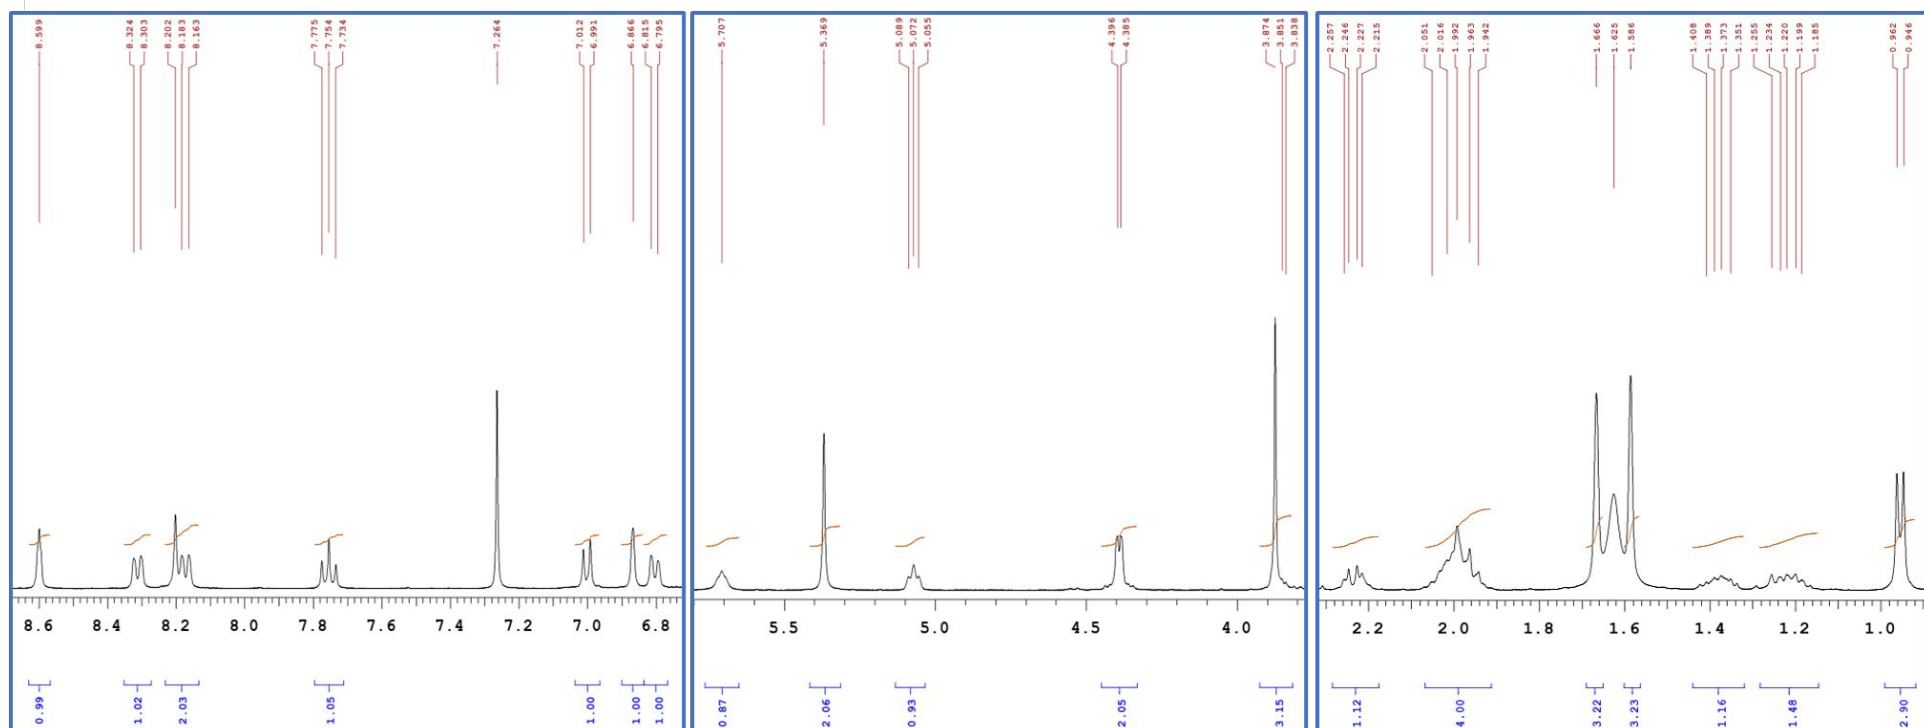

<sup>13</sup>C-NMR

18h

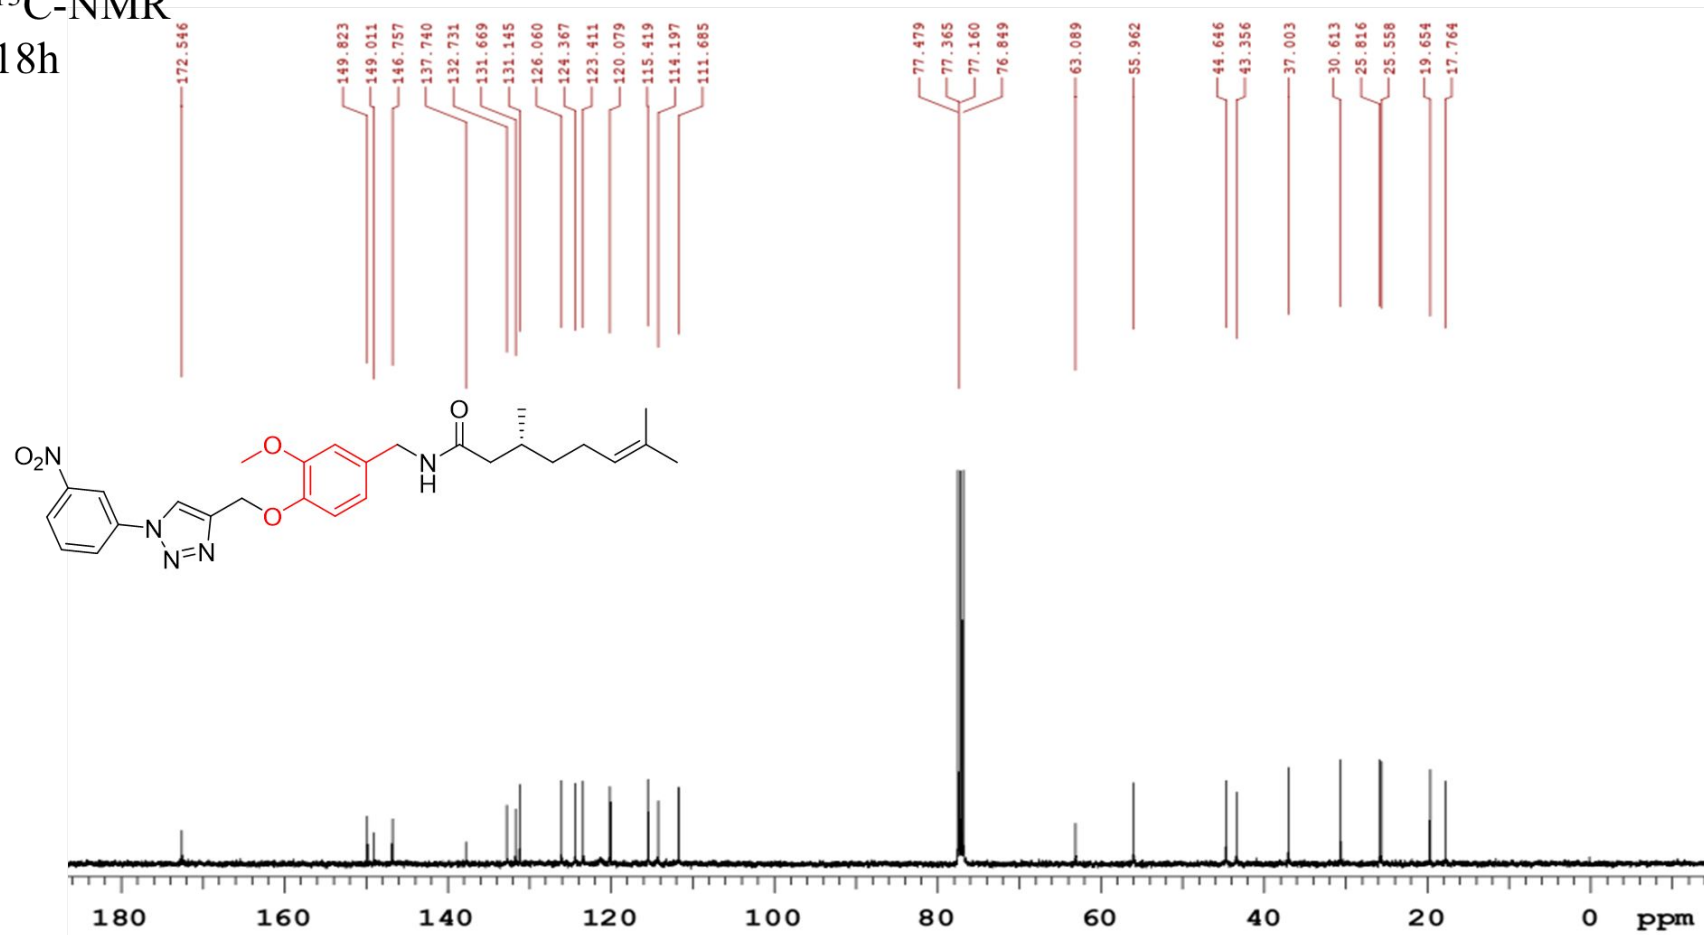



Sample Information

Sample Name : SA 8  
Tray# : 1  
Injection Volume : 0.5  
Method File : MASS SCANN 13APRIL2021.lcm  
Date Processed : 12/16/2021 3:42:24 PM

Sample ID :  
Vial# : 89  
Data File : 16-12-2021 Jlcd30.lcd

Processed by : System Administrator

LC-MS spectra  
18h

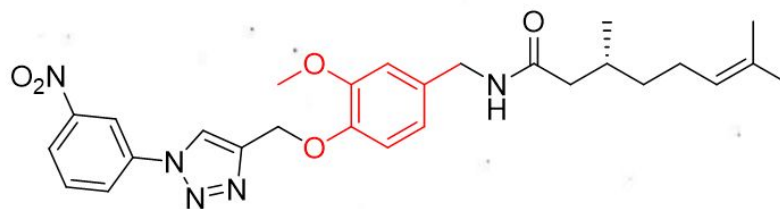

MS Spectrum

BG Mode:Averaged 0.464-0.979(55-115)\$EndIf\$ Segment 1 - Event 1

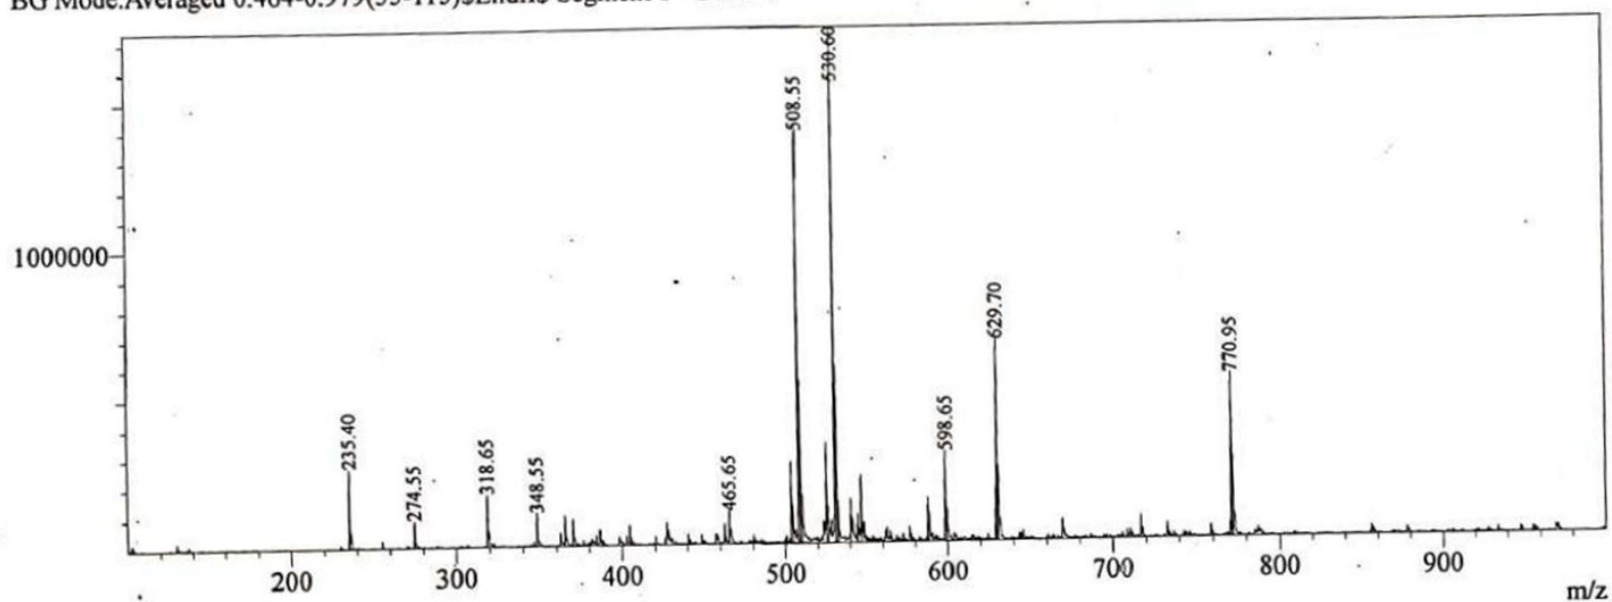

BG Mode:Averaged 0.472-0.987(56-116)\$EndIf\$ Segment 1 - Event 2

<sup>1</sup>H-NMR

18i

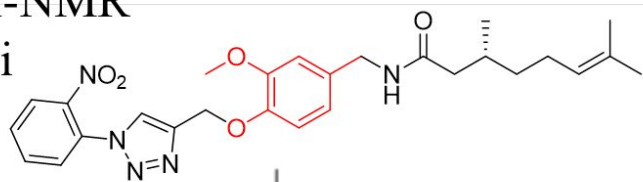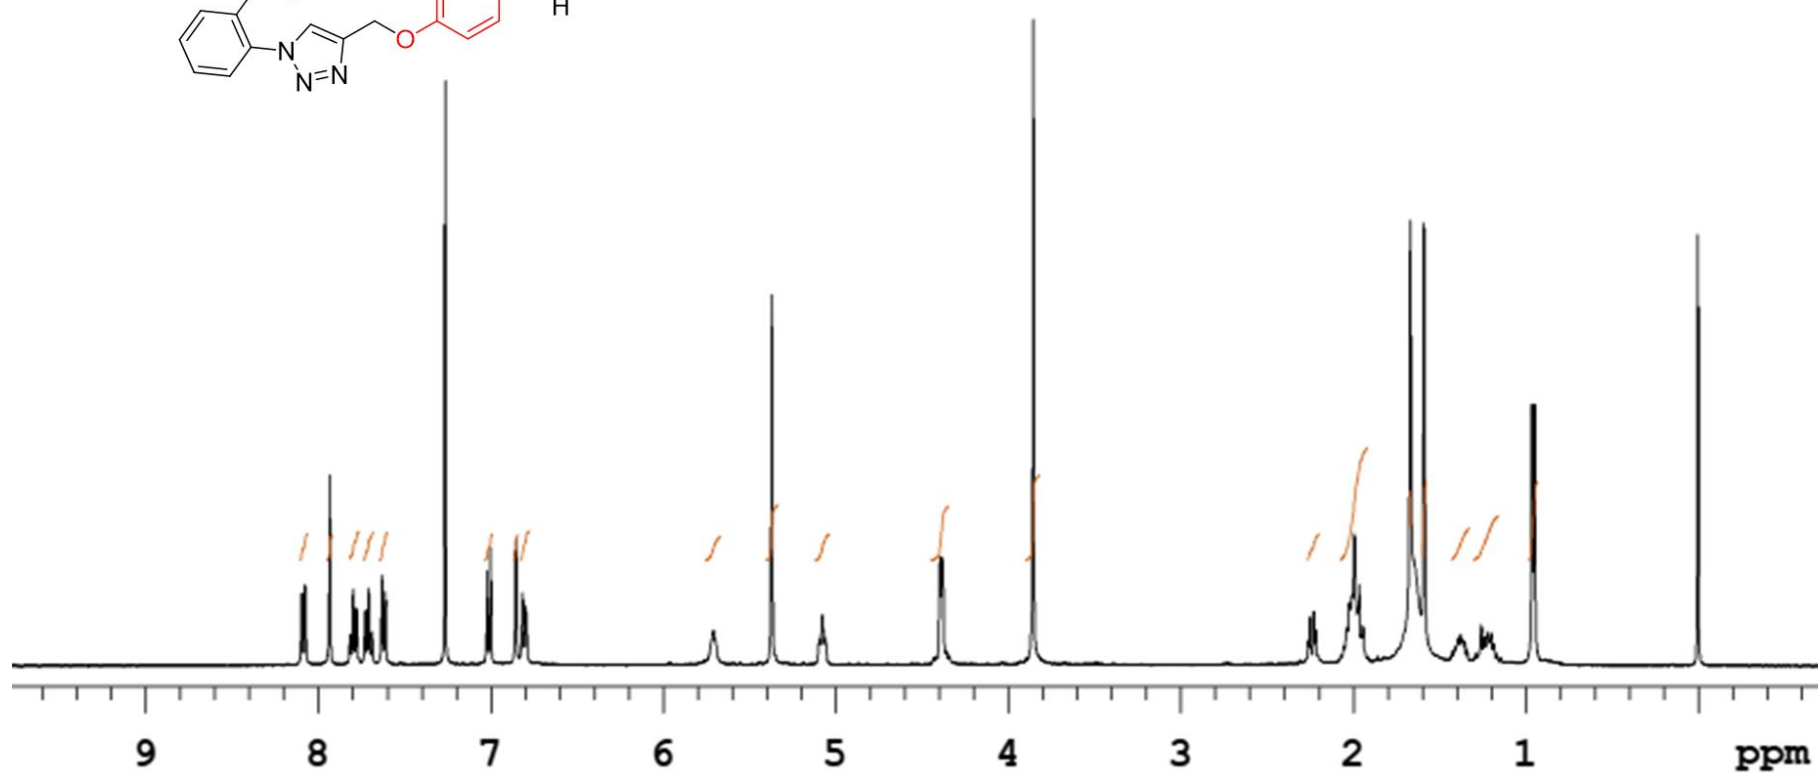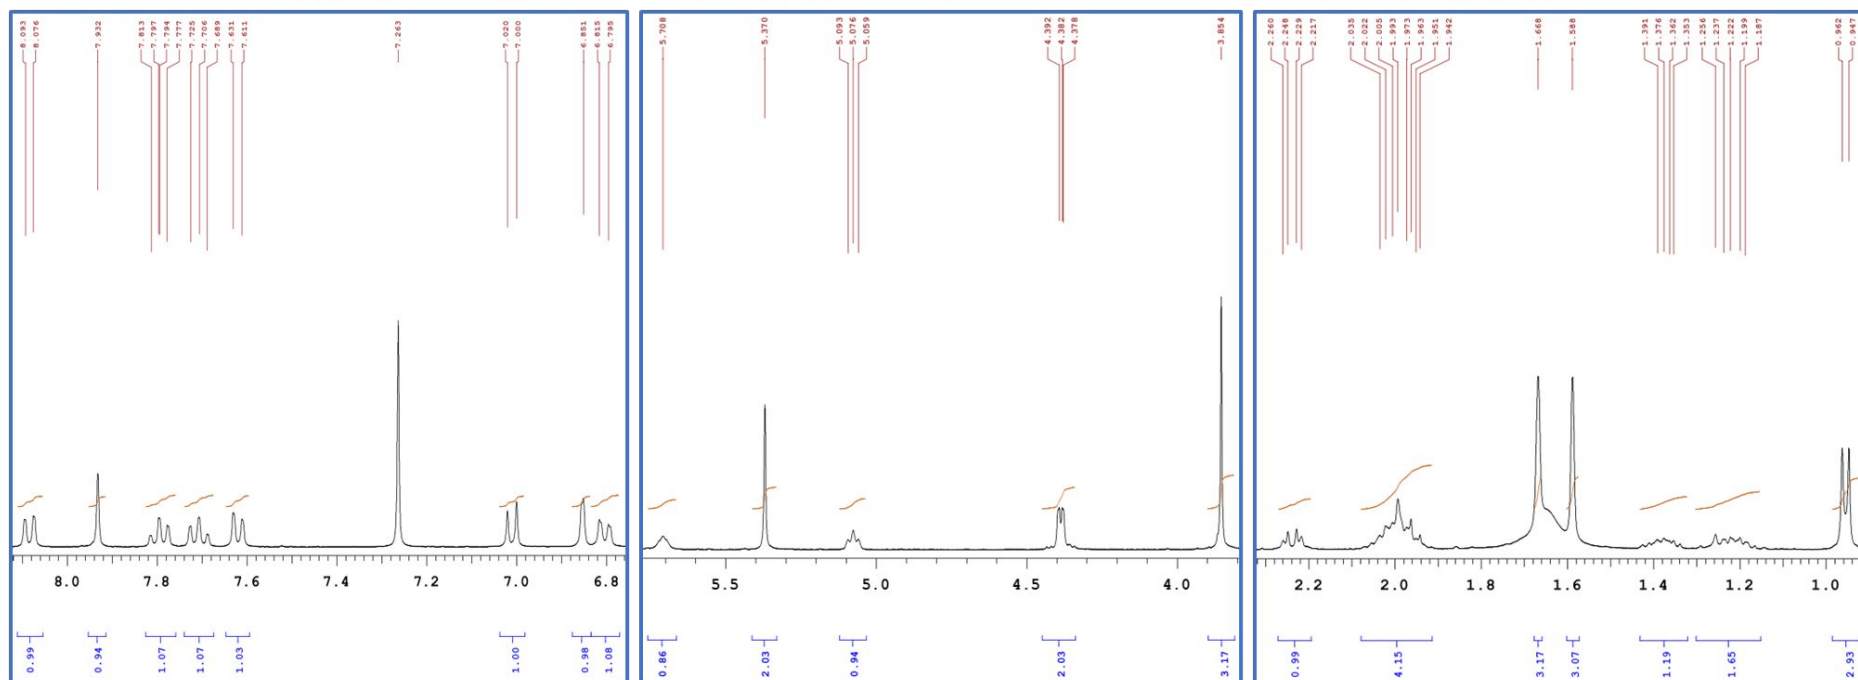

<sup>13</sup>C-NMR  
18i

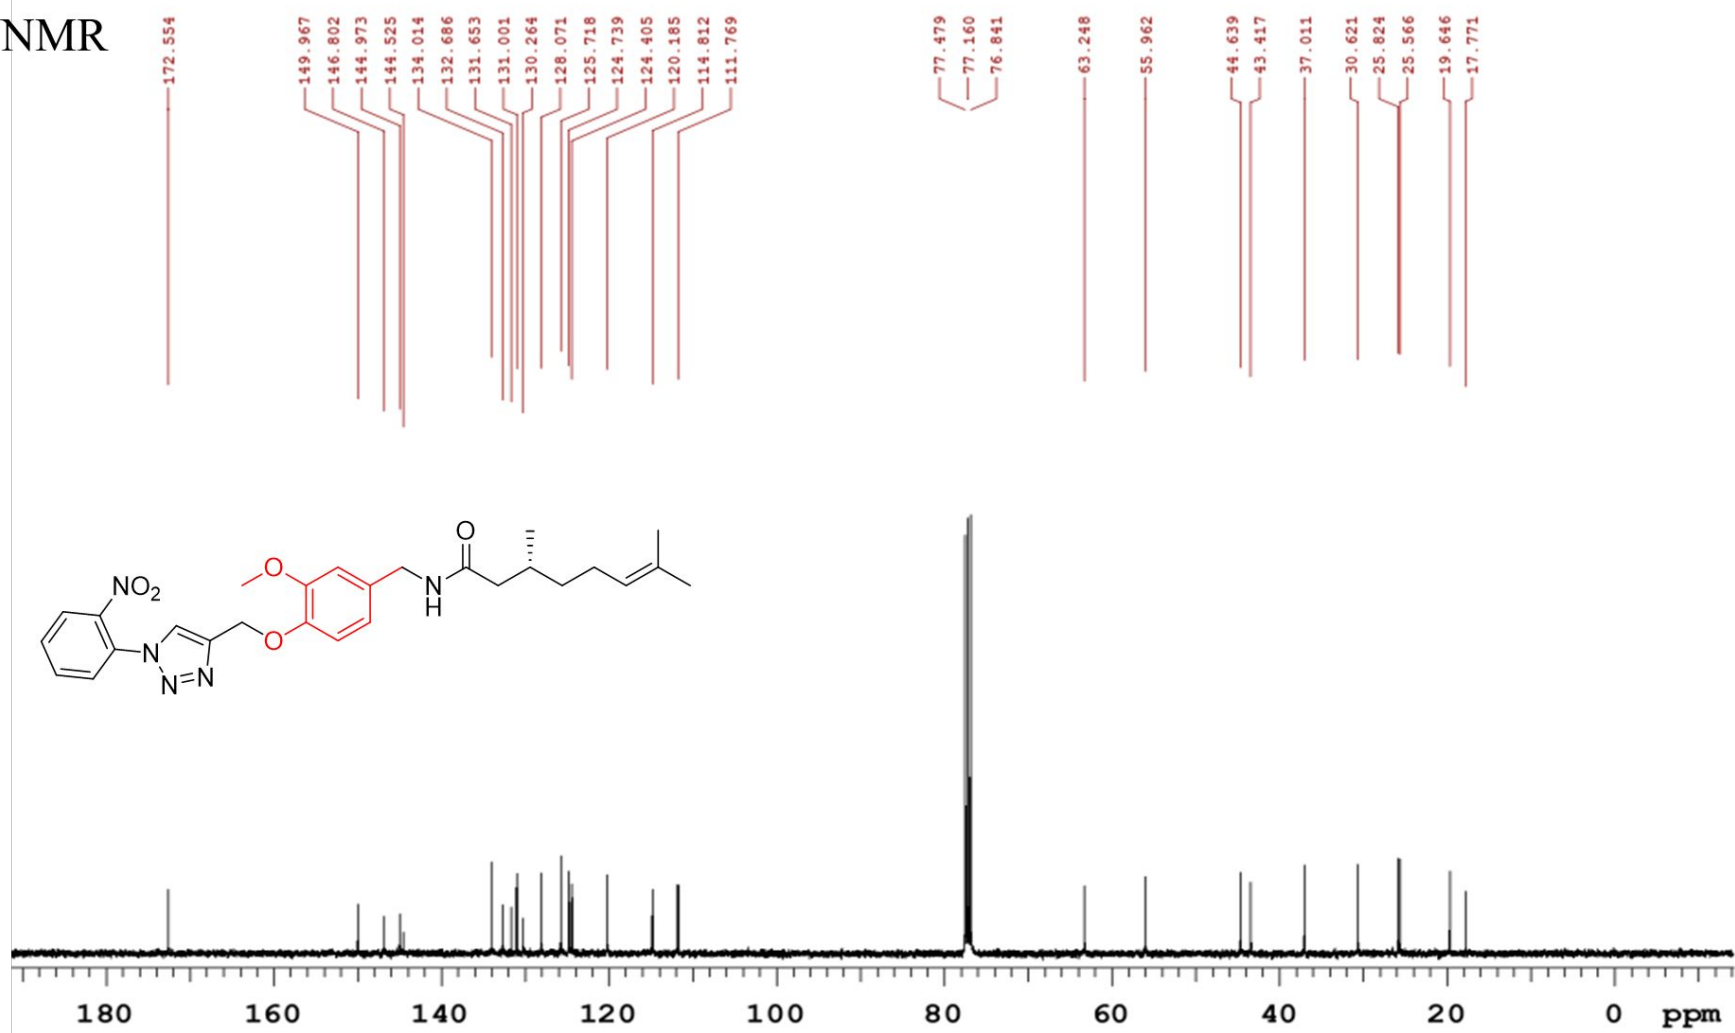

# Elemental Composition Report

## LC-MS spectra 18i

Page 1

### Single Mass Analysis

Tolerance = 3.0 PPM / DBE: min = -1.5, max = 50.0  
Element prediction: Off  
Number of isotope peaks used for i-FIT = 3

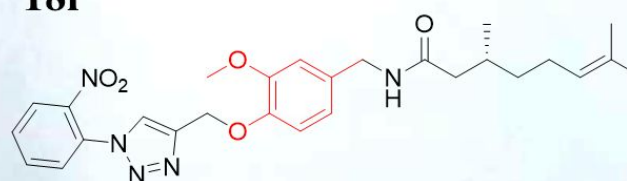

Monoisotopic Mass, Even Electron Ions

40 formula(e) evaluated with 1 results within limits (up to 3 closest results for each mass)

Elements Used:

C: 0-27 H: 0-200 N: 0-5 O: 0-5

SAD-9

QMI DIVISION, CSIR-IIIM JAMMU  
Xevo G2-XS QTOF YFC2015

11-Jan-2022

11:47:44

1: TOF MS ES+  
3.23e+006

110127 8 (0.172) Cm (8)

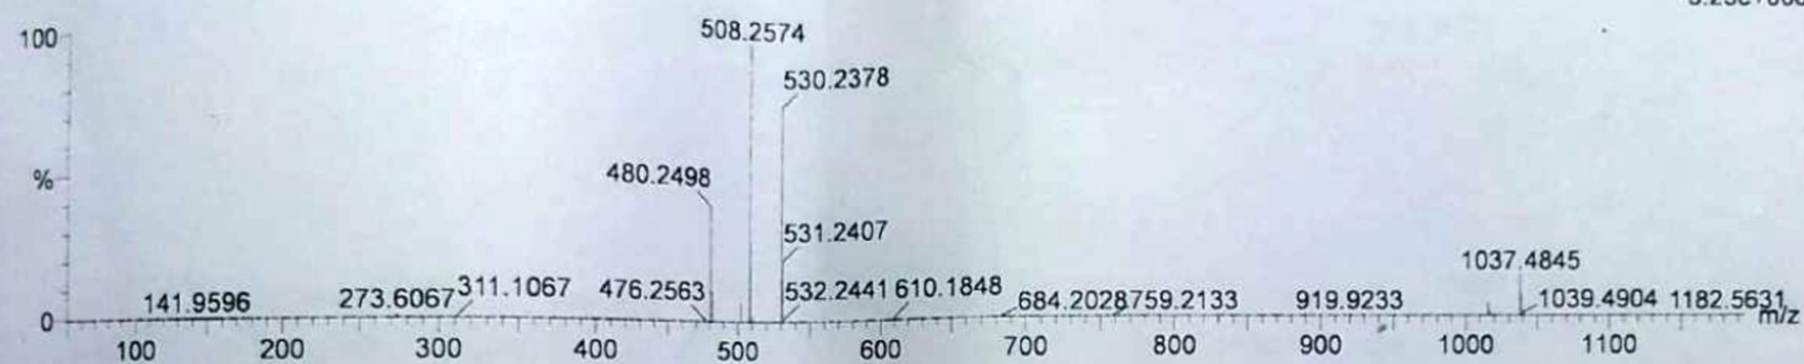

Minimum: -1.5  
Maximum: 2.0 3.0 50.0

| Mass     | Calc. Mass | mDa | PPM | DBE  | i-FIT | Norm | Conf(%) | Formula       |
|----------|------------|-----|-----|------|-------|------|---------|---------------|
| 508.2574 | 508.2560   | 1.4 | 2.8 | 13.5 | 36.5  | n/a  | n/a     | C27 H34 N5 O5 |

# HR-MS spectra

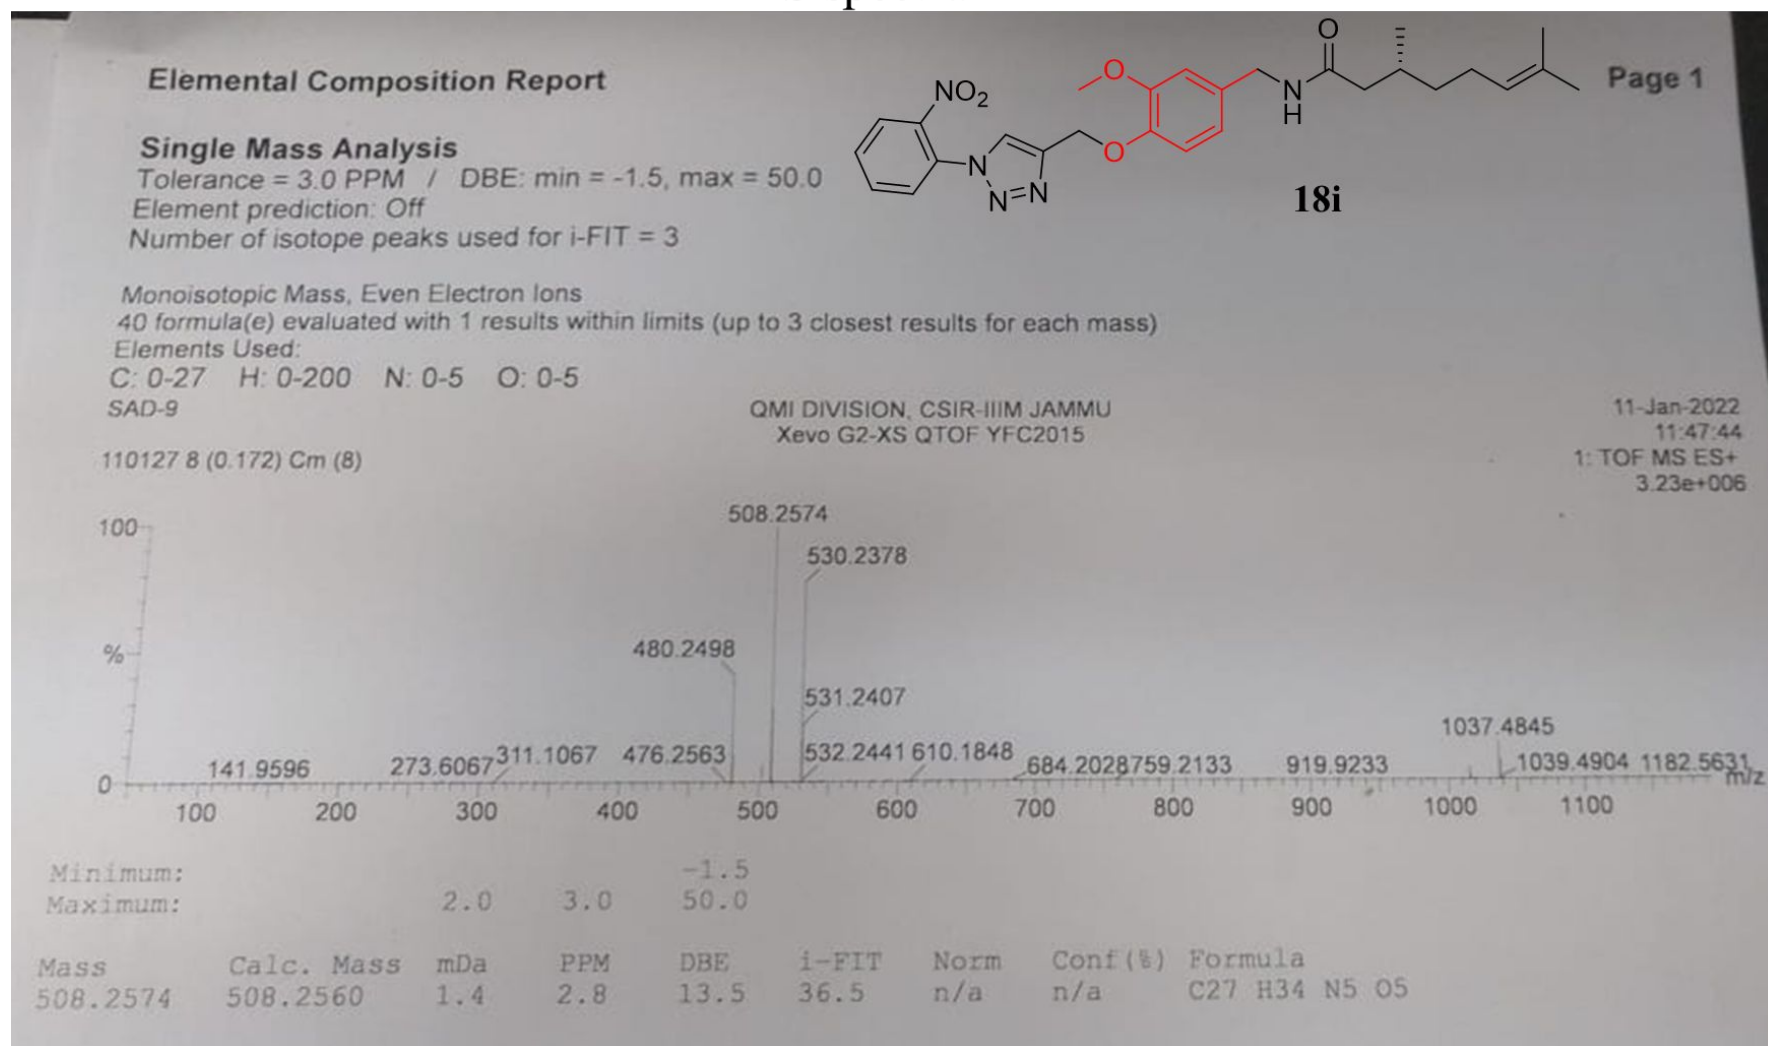

<sup>1</sup>H-NMR  
18j

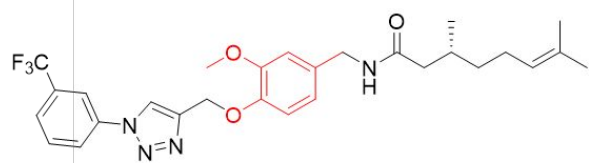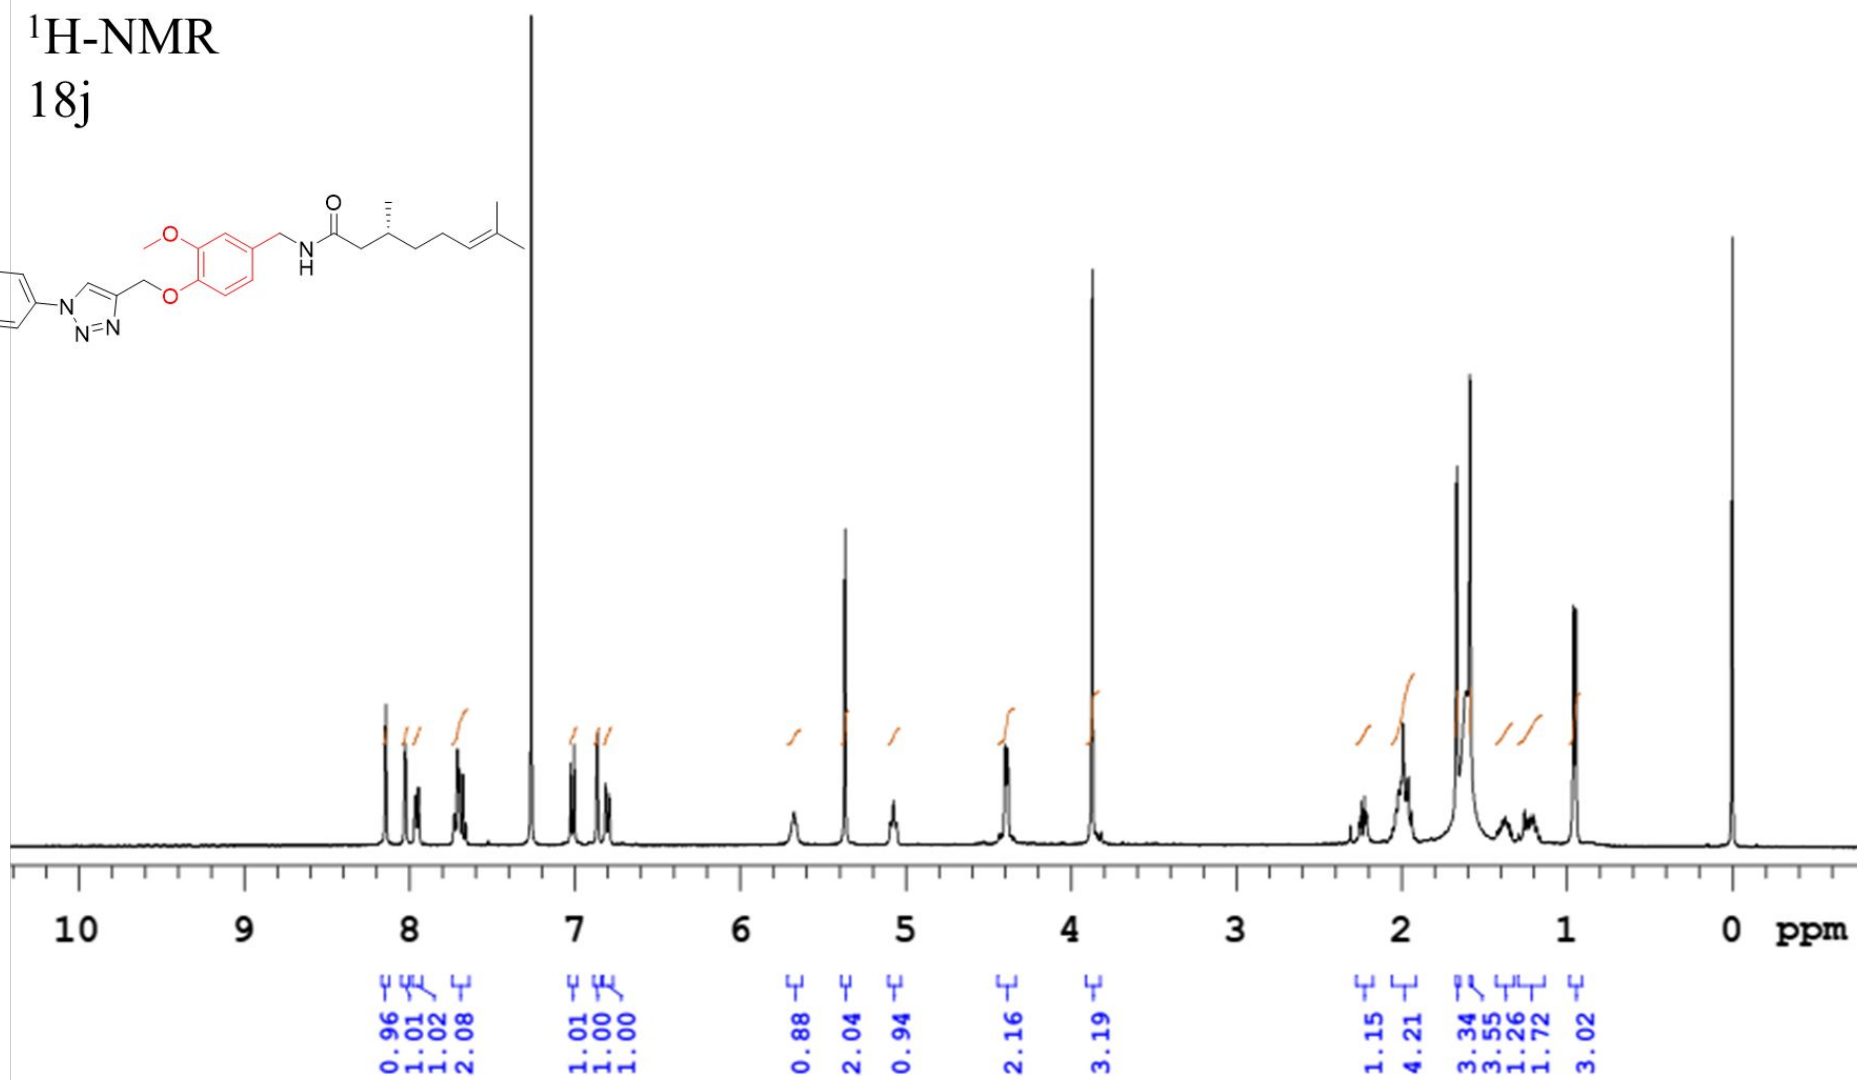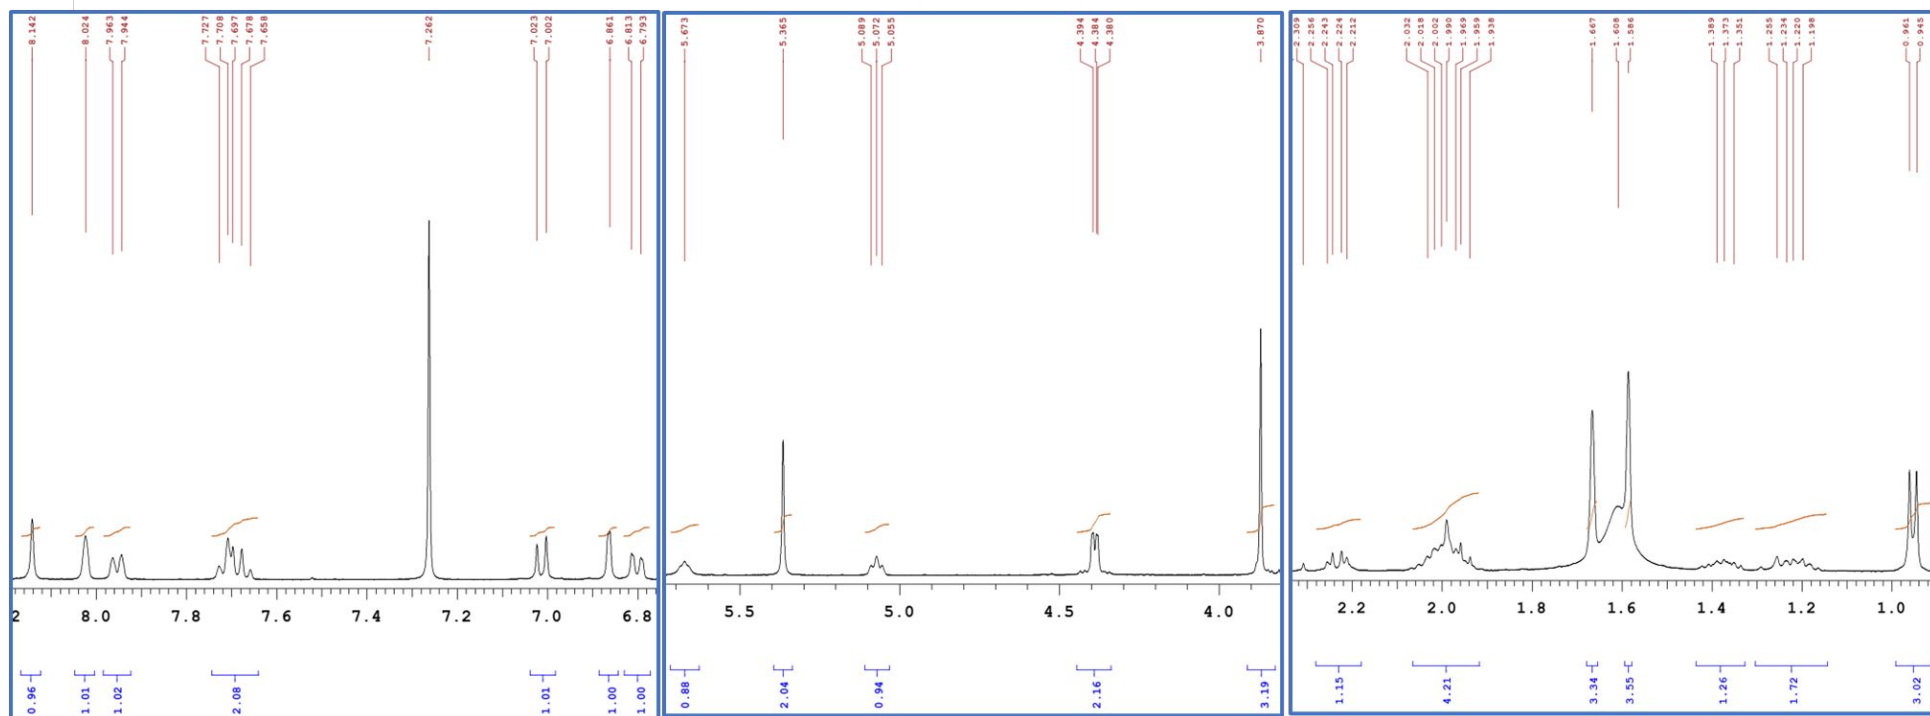

<sup>13</sup>C-NMR  
18j

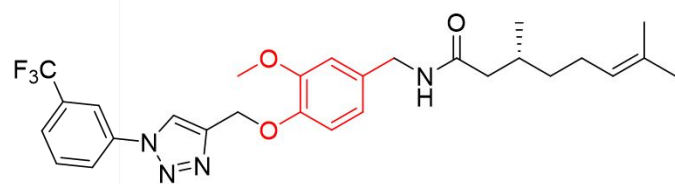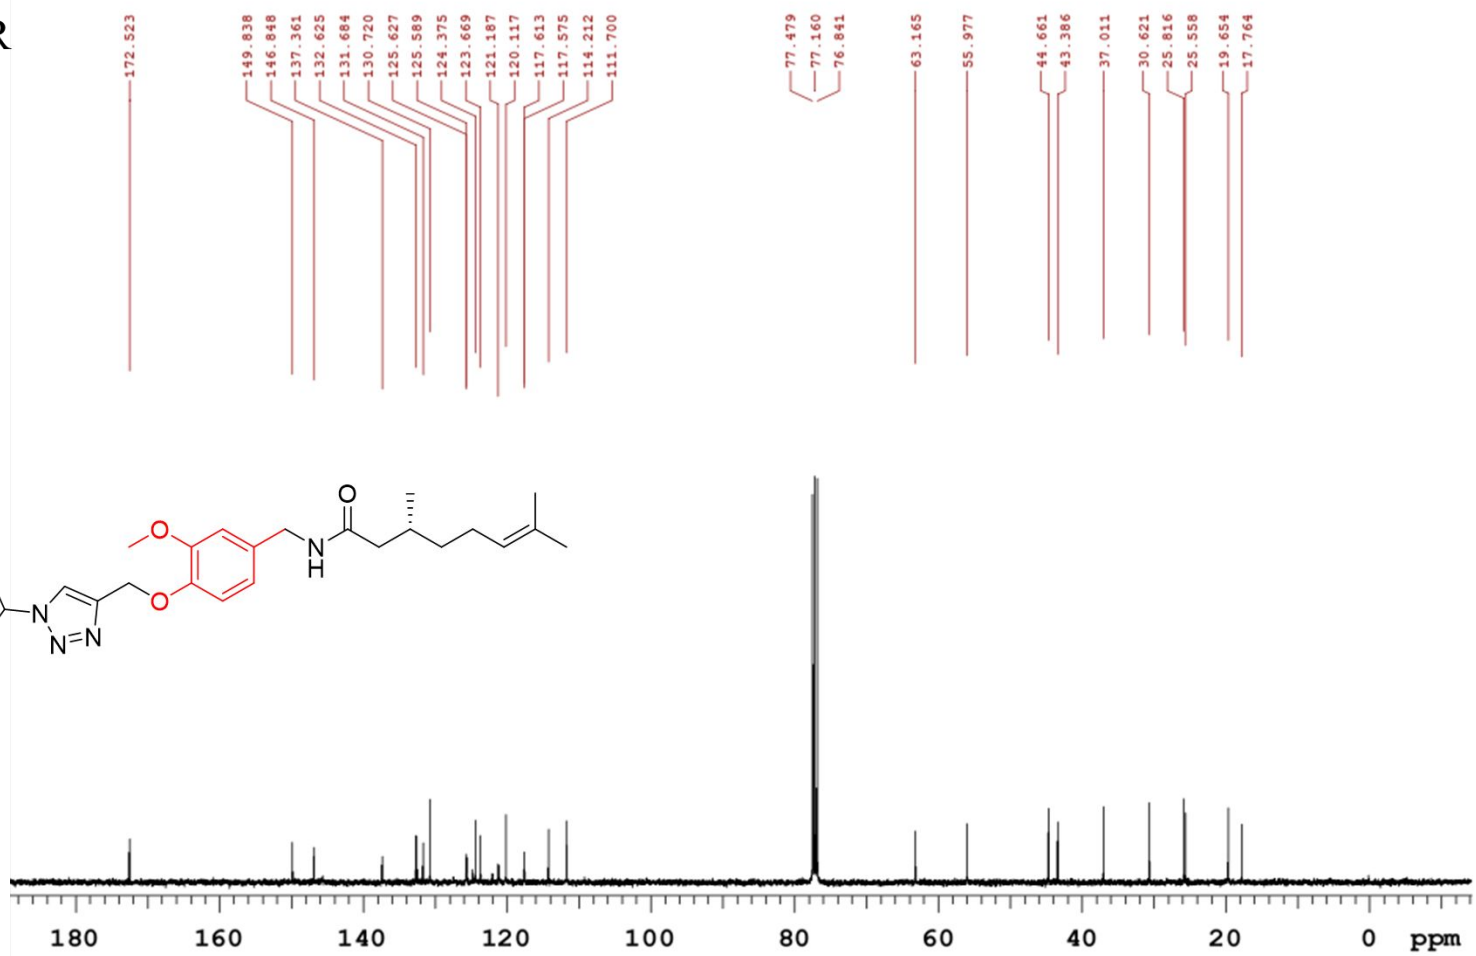

Sample Information  
Sample Name : SA 10  
Tray# : 1  
Injection Volume : 0.5  
Method File : MASS SCANN 13APRIL2021.lcm  
Date Processed : 12/16/2021 3:45:59 PM

Sample ID :  
Vial# : 91  
Data File : 16-12-2021 Jlcd32.lcd

Processed by : System Administrator

## LC-MS spectra 18j

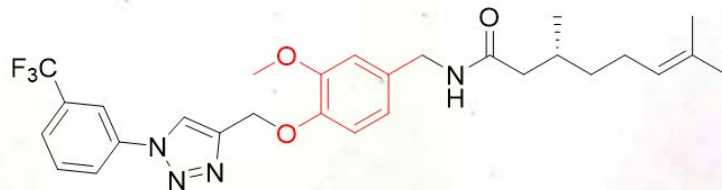

MS Spectrum

BG Mode: Averaged 0.498-0.979(59-115)\$EndIf\$ Segment 1 - Event 1

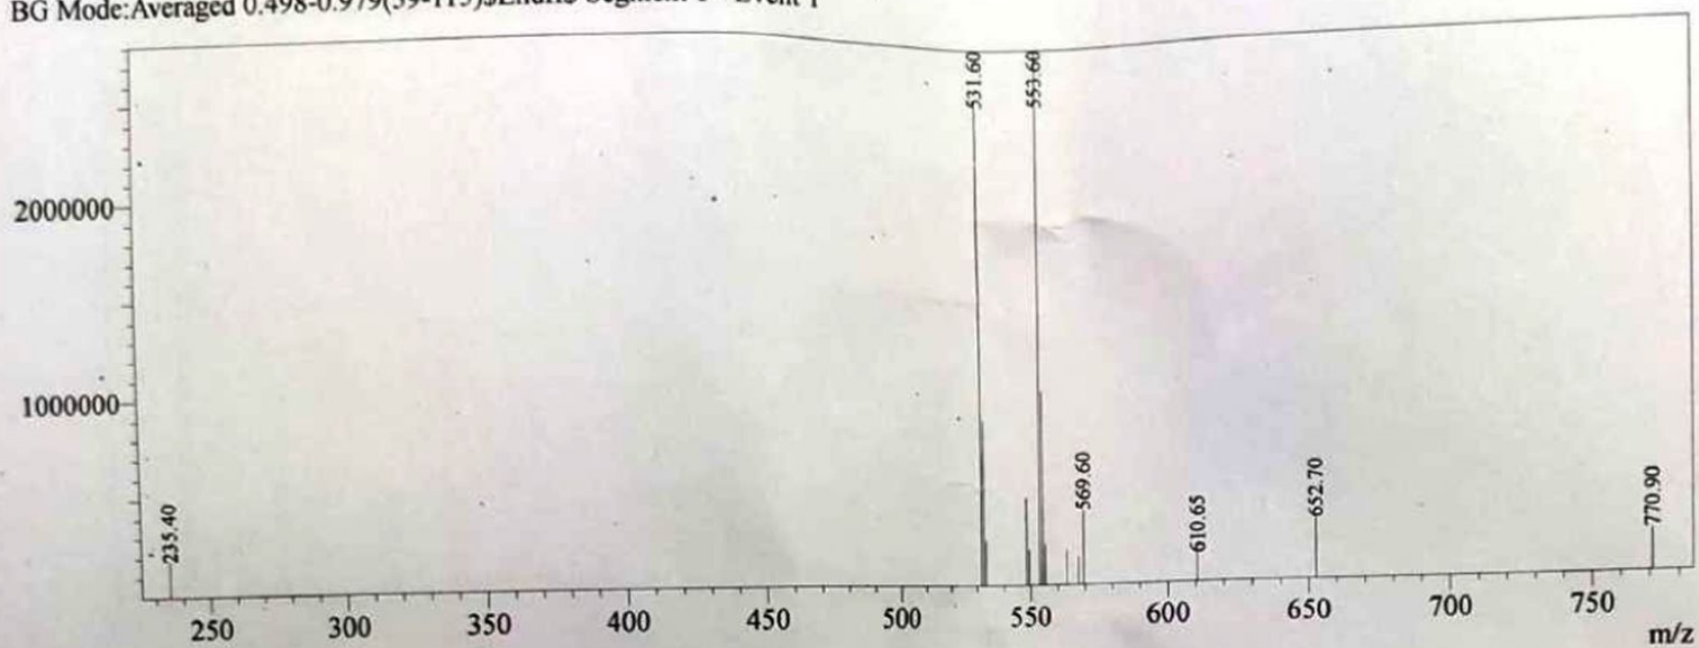



# HR-MS spectra

Page 1

## Elemental Composition Report

### Single Mass Analysis

Tolerance = 3.0 PPM / DBE: min = -1.5, max = 50.0  
 Element prediction: Off  
 Number of isotope peaks used for i-FIT = 3

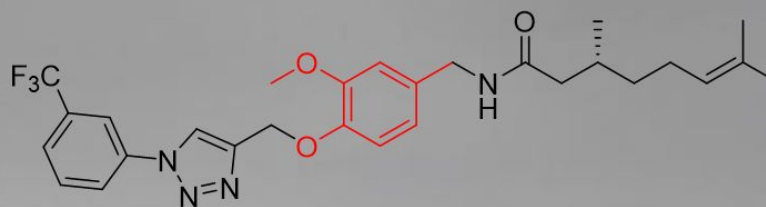

**18j**

Monoisotopic Mass, Even Electron Ions  
 85 formula(e) evaluated with 1 results within limits (up to 3 closest results for each mass)  
 Elements Used:  
 C: 0-28 H: 0-200 N: 0-4 O: 0-3 F: 0-3  
 SAD-10

QMI DIVISION, CSIR-IIIM JAMMU  
 Xevo G2-XS QTOF YFC2015

11-Jan-2022  
 11:42:27  
 1: TOF MS ES+  
 2.74e+005

110125 10 (0.225) Cm (10:11)

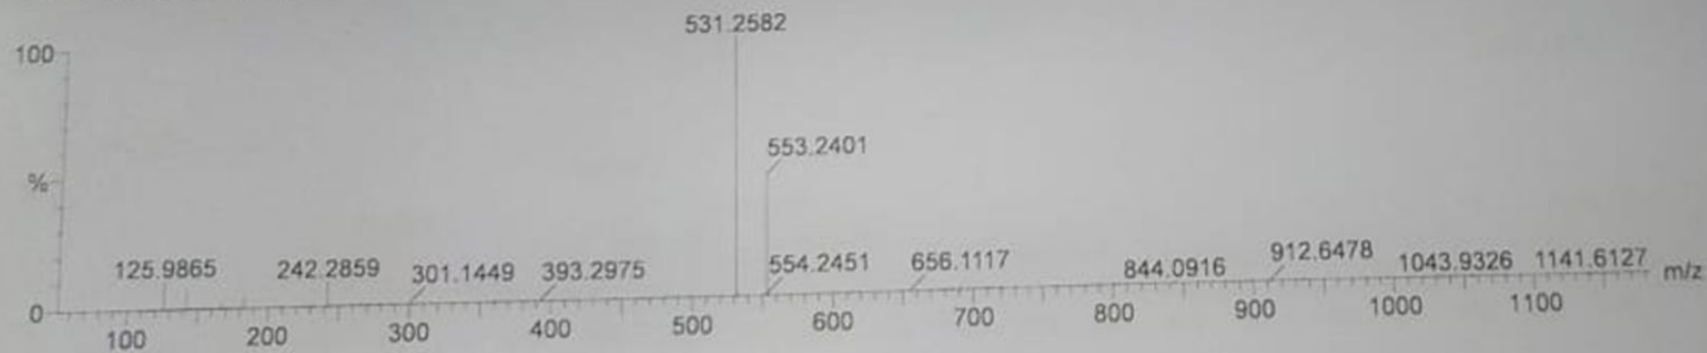

Minimum: -1.5  
 Maximum: 2.0 3.0 50.0

| Mass     | Calc. Mass | mDa  | PPM  | DBE  | i-FIT | Norm | Conf (%) | Formula          |
|----------|------------|------|------|------|-------|------|----------|------------------|
| 531.2582 | 531.2583   | -0.1 | -0.2 | 12.5 | 44.3  | n/a  | n/a      | C28 H34 N4 O3 F3 |

# <sup>1</sup>H-NMR

18k

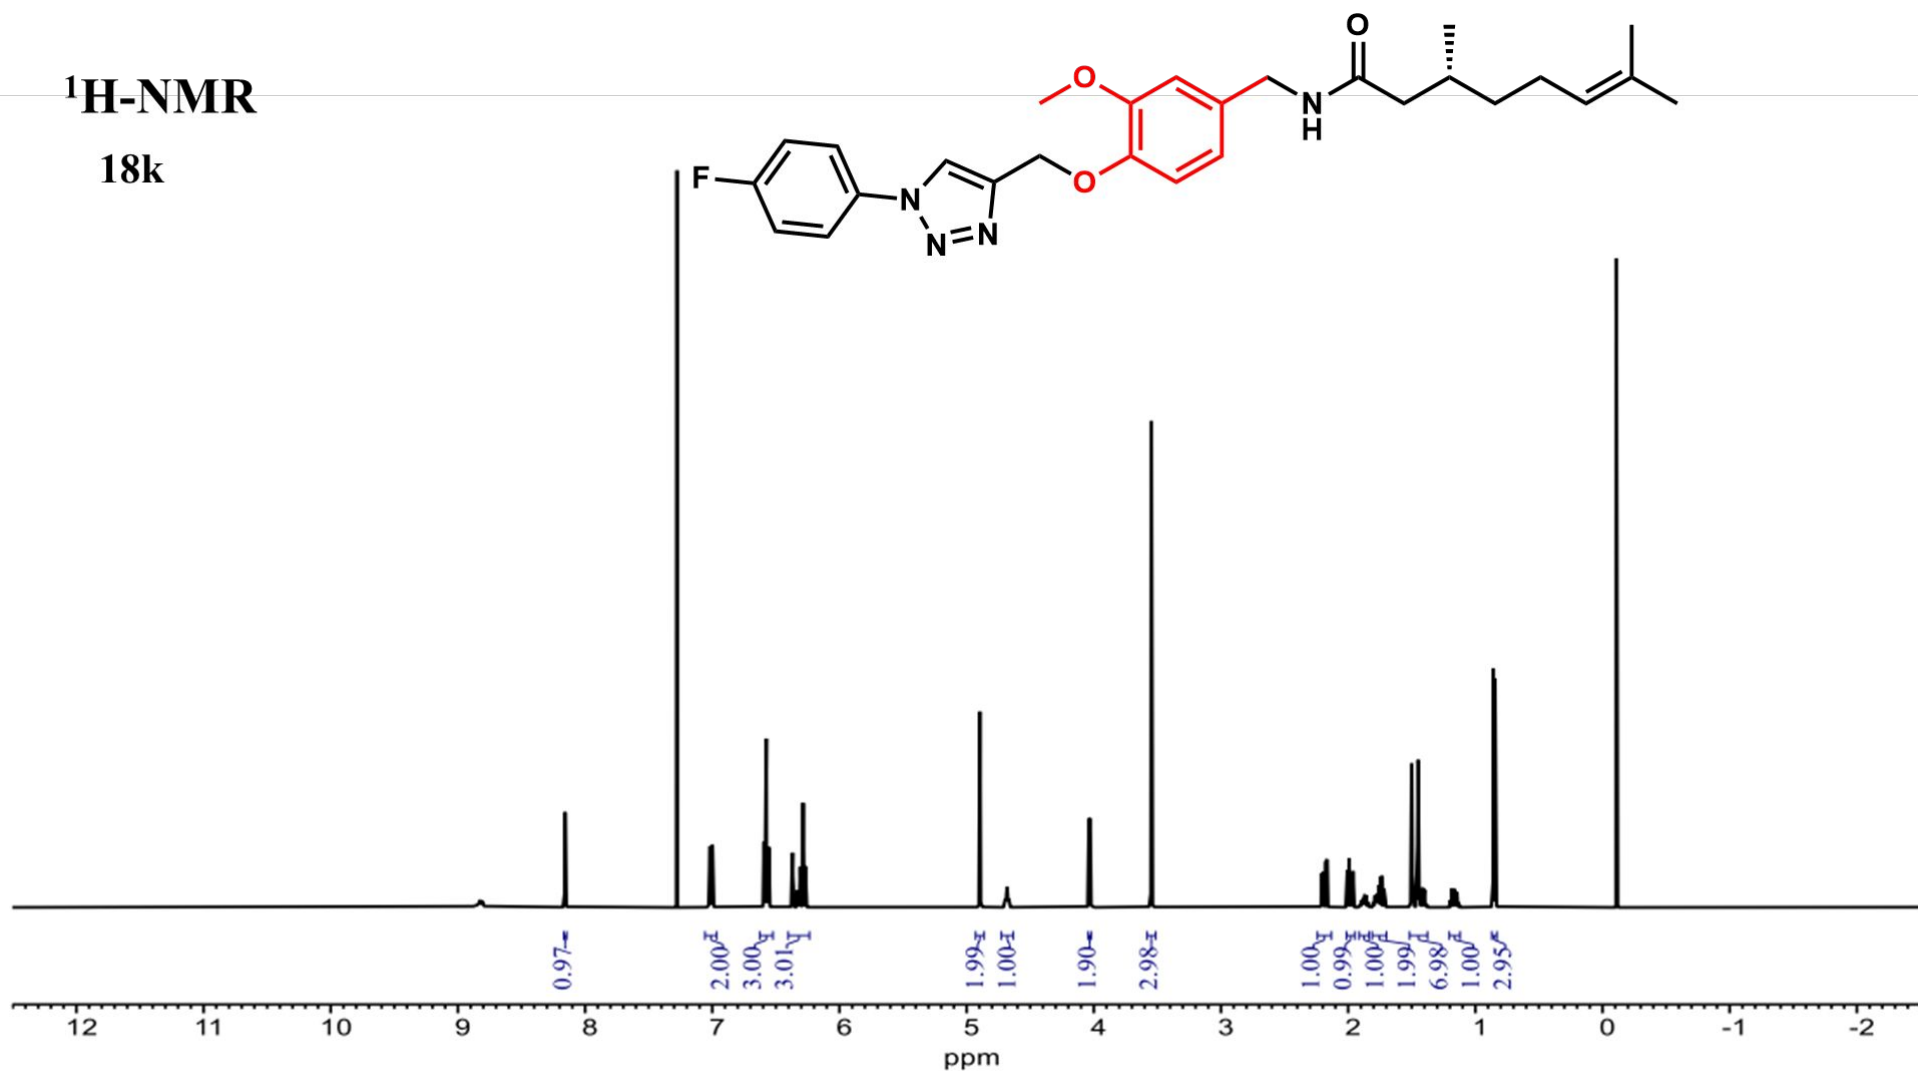

Plotname: SAD11\_PROTON\_01\_plot01

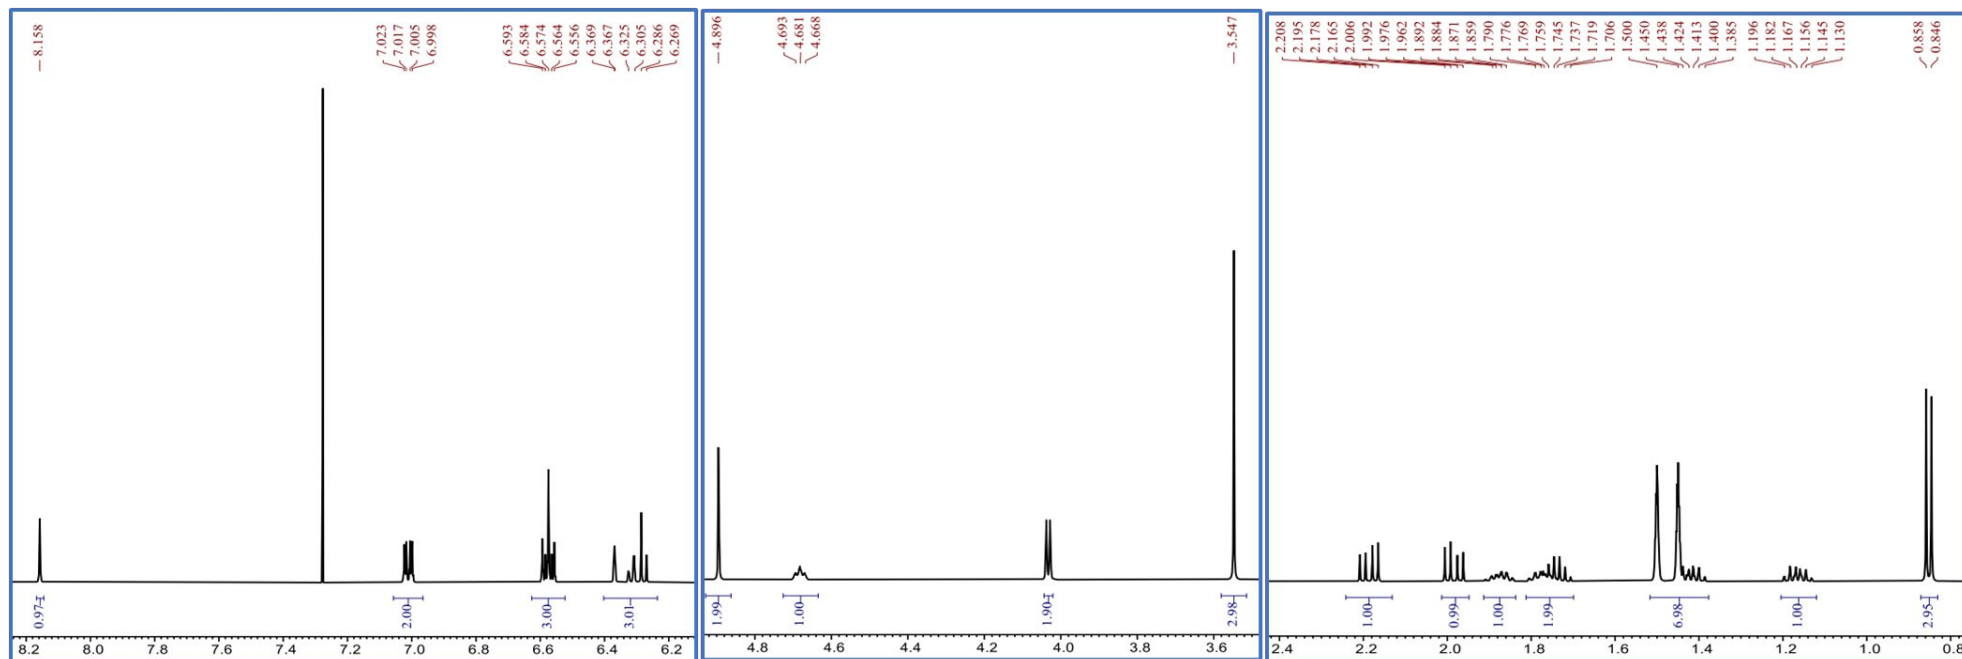

Sample code: SAD11

VARIAN 100MHZ NMR

Solvent: CDCl3

Date: Sep 08 2021

171.944

161.222

148.878

146.194

144.616

133.198

132.058

130.194

123.476

121.760

117.336

117.002

113.927

110.613

59.890

54.526

43.146

35.899

29.124

25.472

24.853

21.315

20.876

### <sup>13</sup>C-NMR

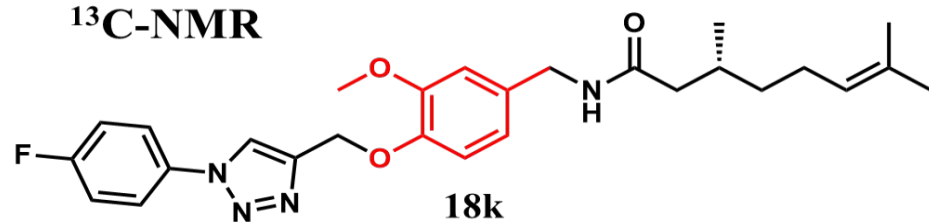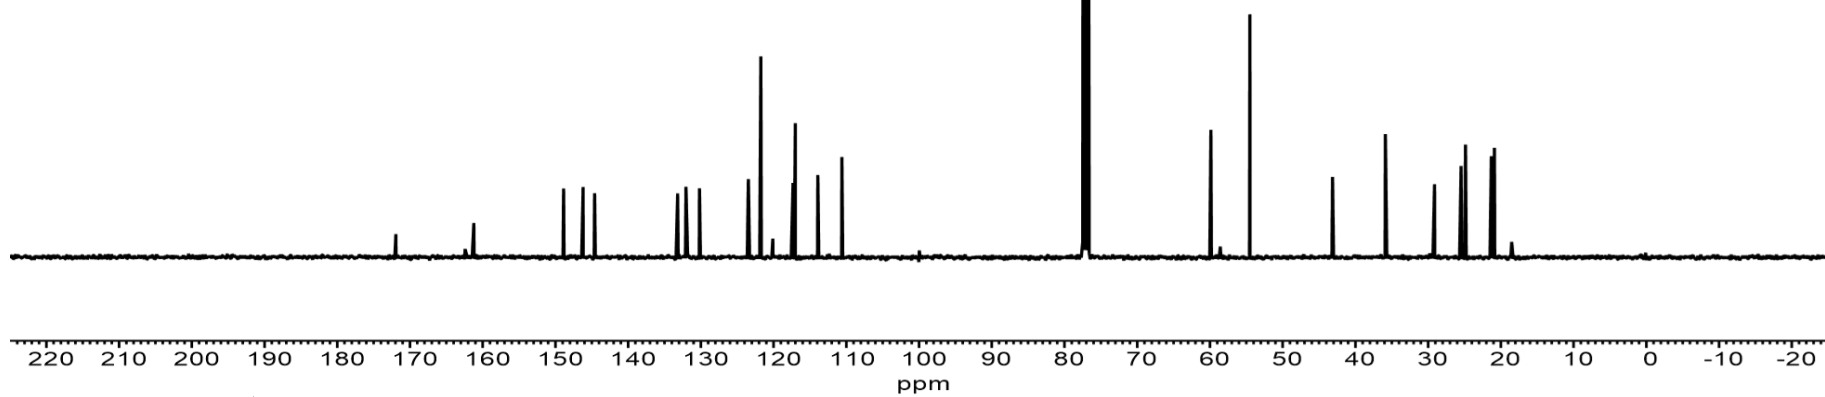

### ESI-MS

Retention  
Time (MS)

MS Area

Mol. Weight  
or Ion

0.397

71036516

176.06 I  
313.14 I  
437.20 I  
481.26 I  
505.25 I

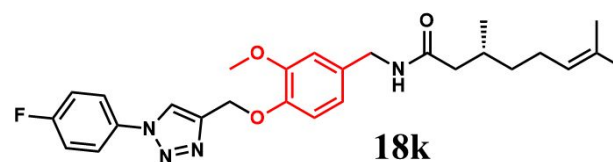

Page 1

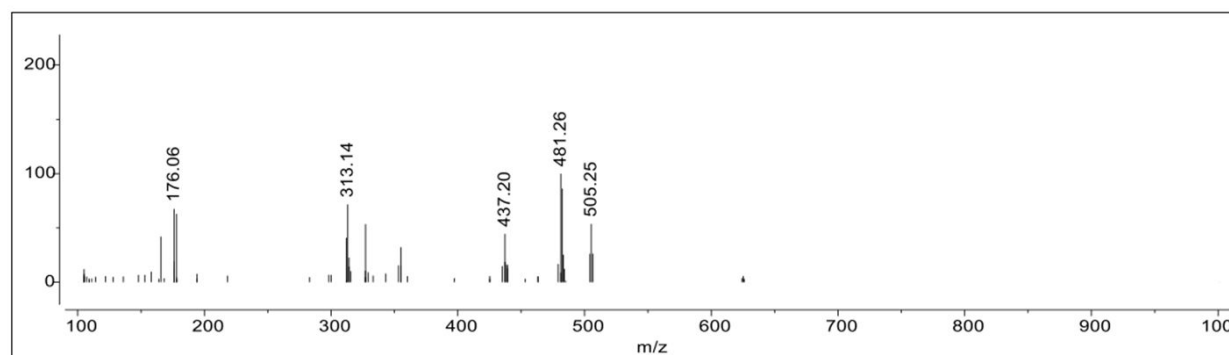

<sup>1</sup>H-NMR  
181

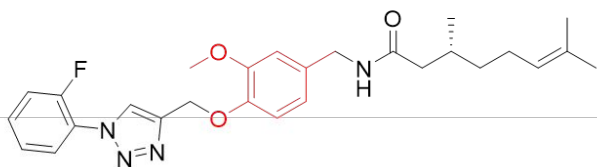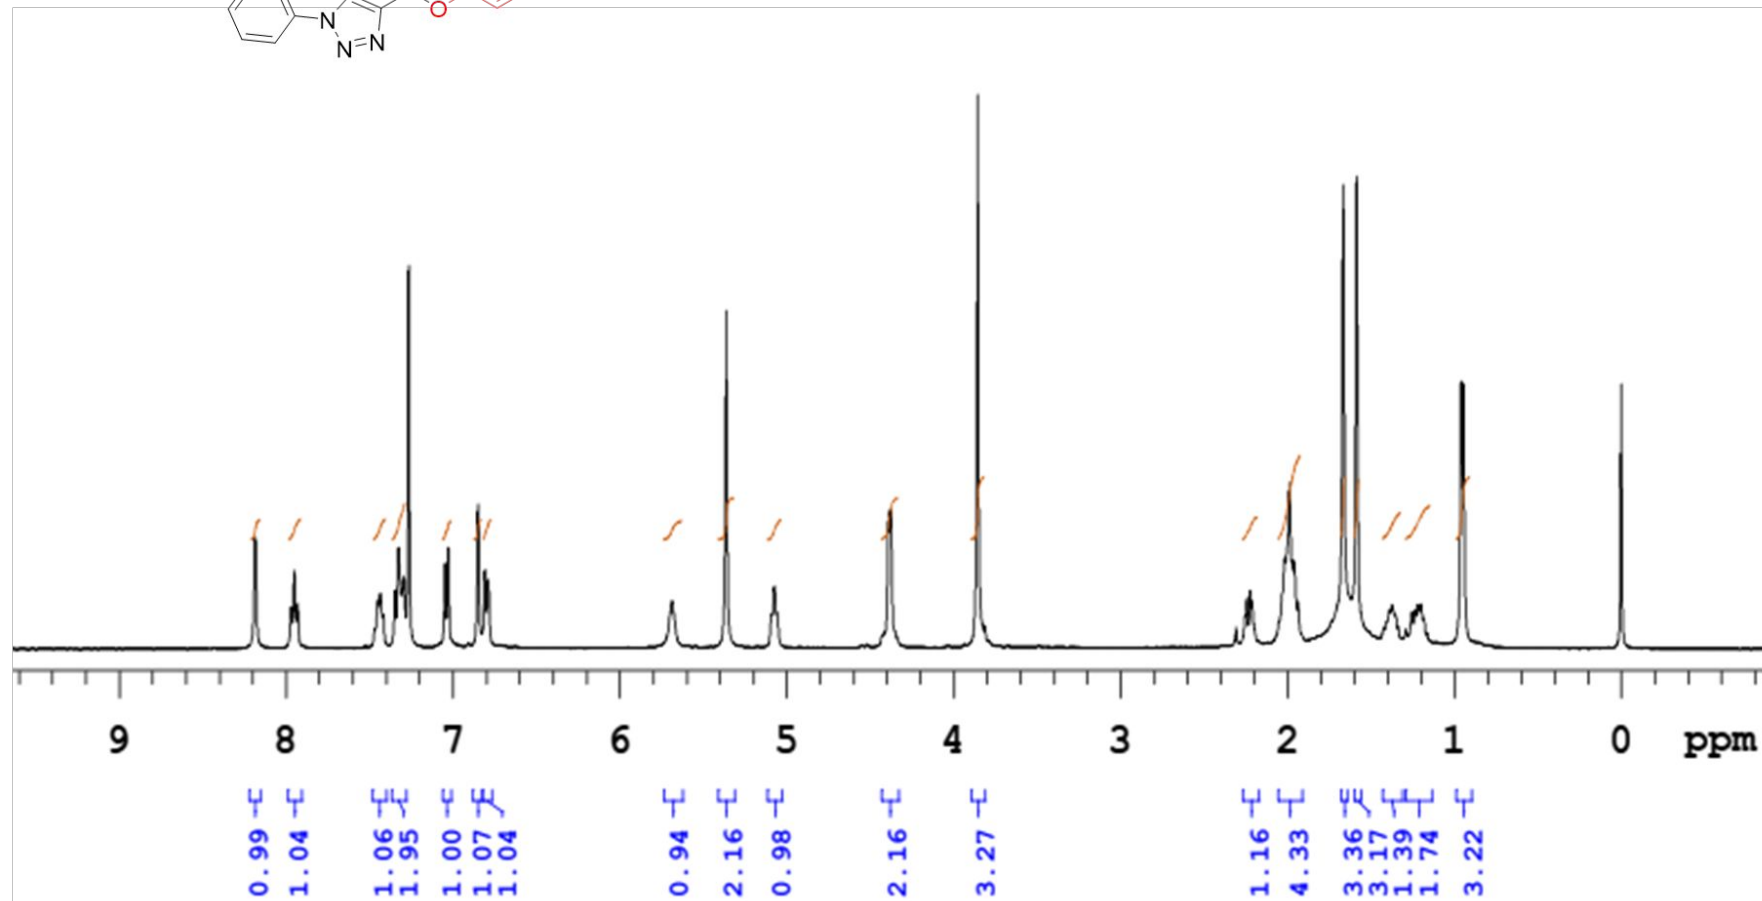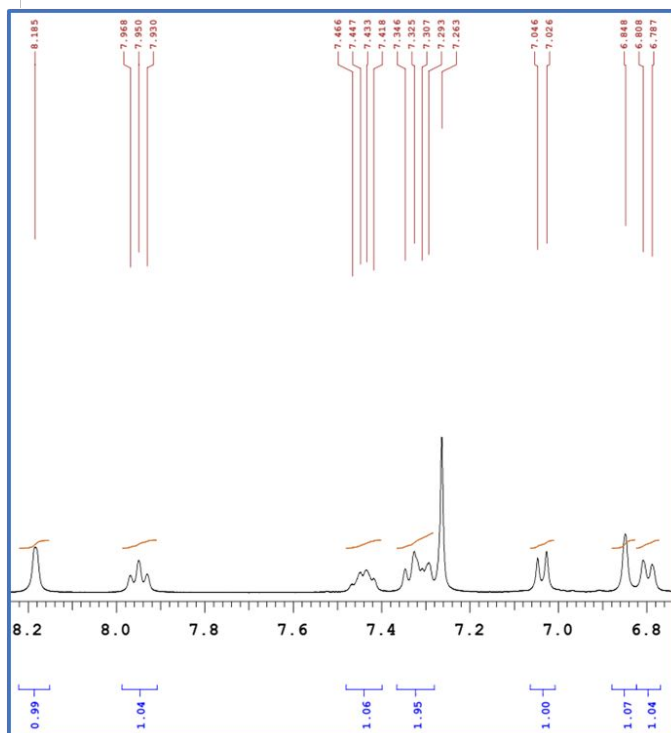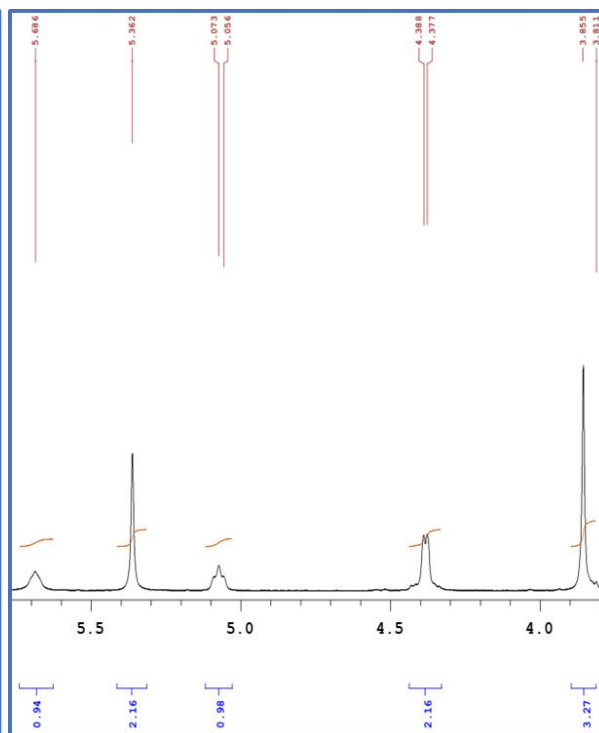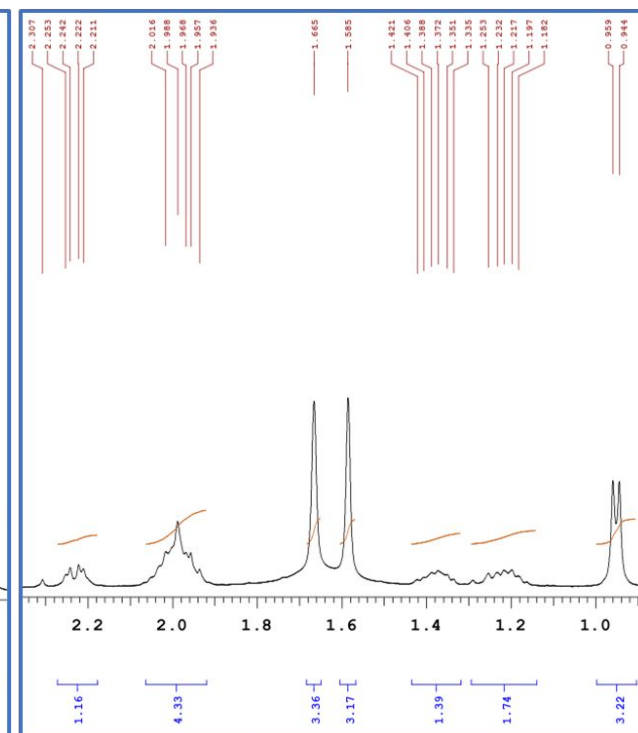

<sup>13</sup>C-NMR  
181

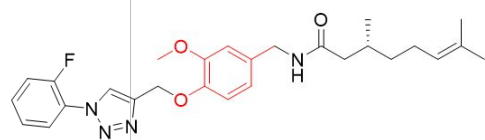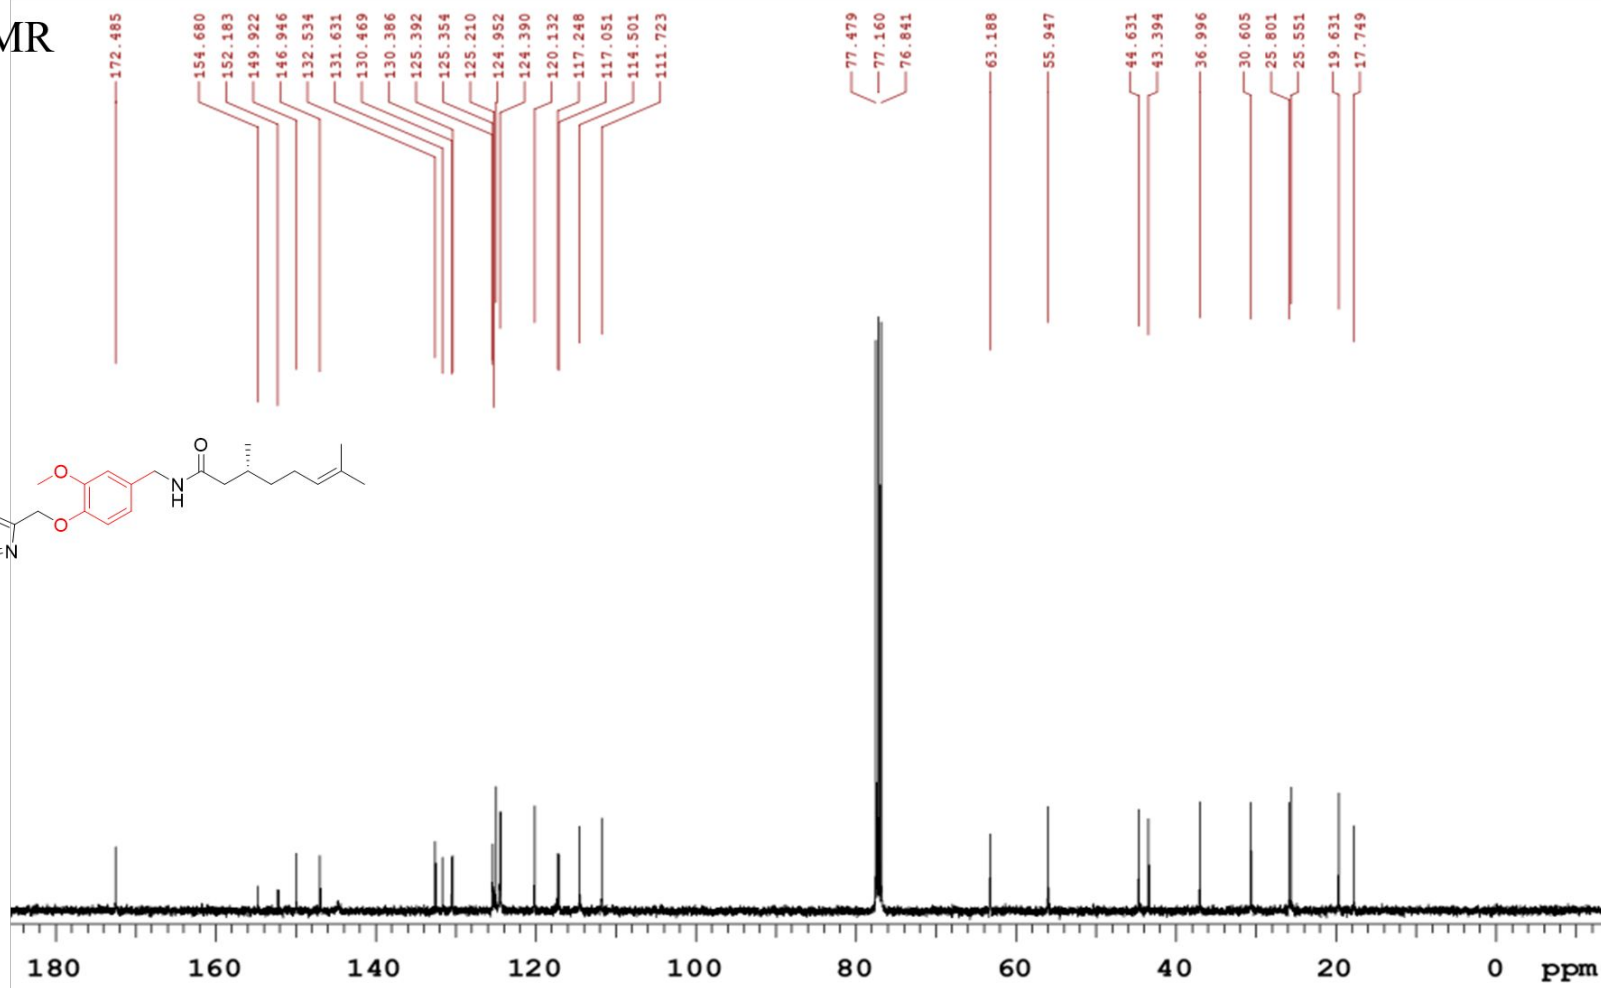

**Sample Information**

Sample Name : SA 12  
Tray# : 1  
Injection Volume : 0.5  
Method File : MASS SCANN 13APRIL2021.lcm  
Date Processed : 12/20/2021 1:16:43 PM

Sample ID :  
Vial# : 14  
Data File : 20-12-2021 Jled14.lcd  
Processed by : System Administrator

**LC-MS Spectra**  
**181**

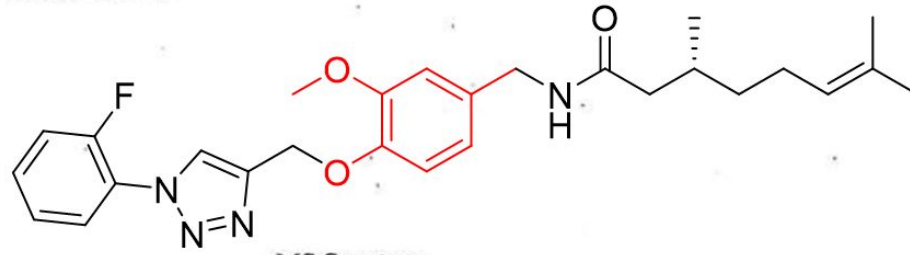

MS Spectrum

BG Mode:Averaged 0.429-0.961(51-113)\$EndIf\$ Segment 1 - Event 1

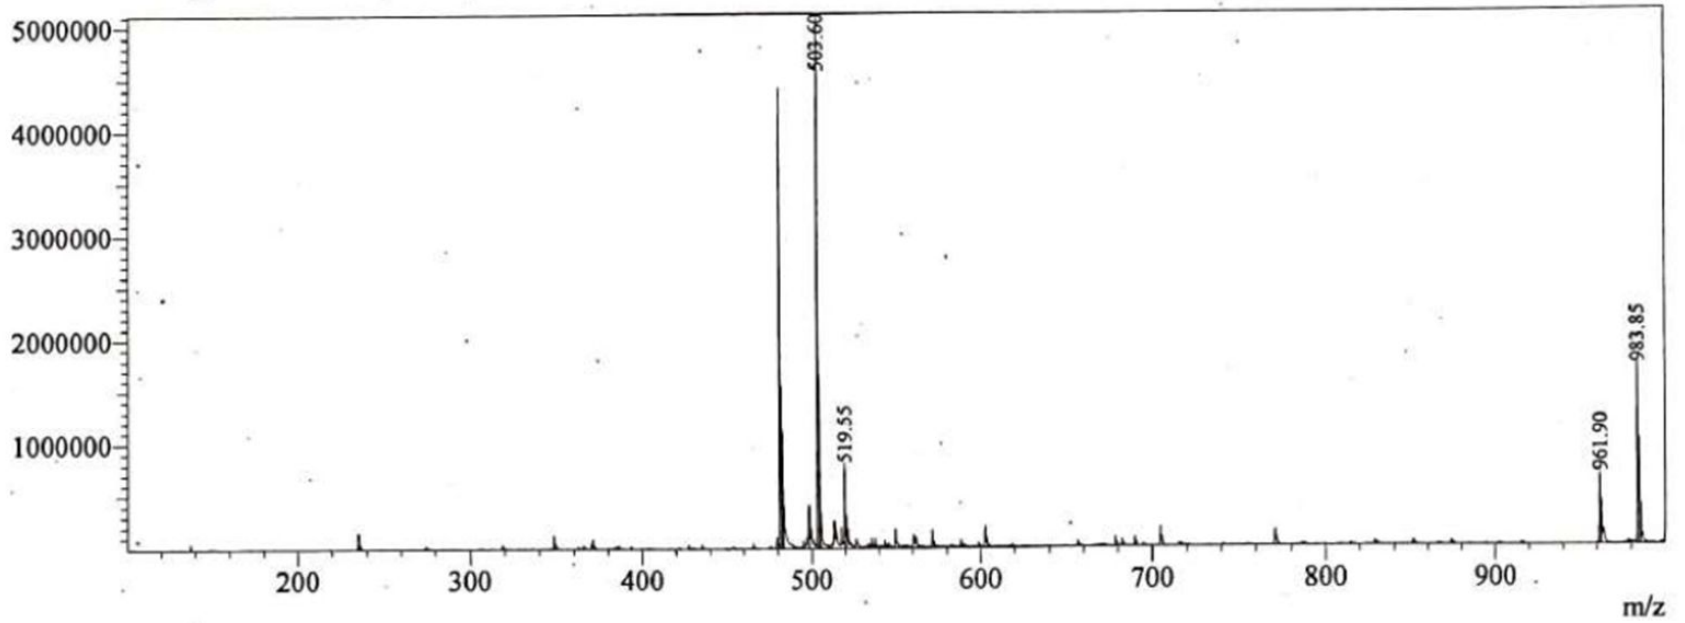

$^1\text{H-NMR}$

18m

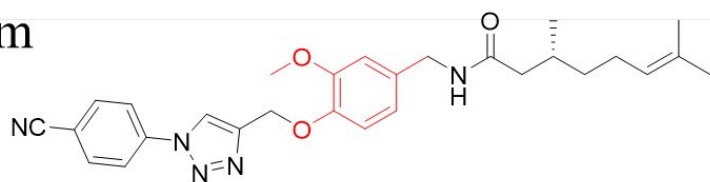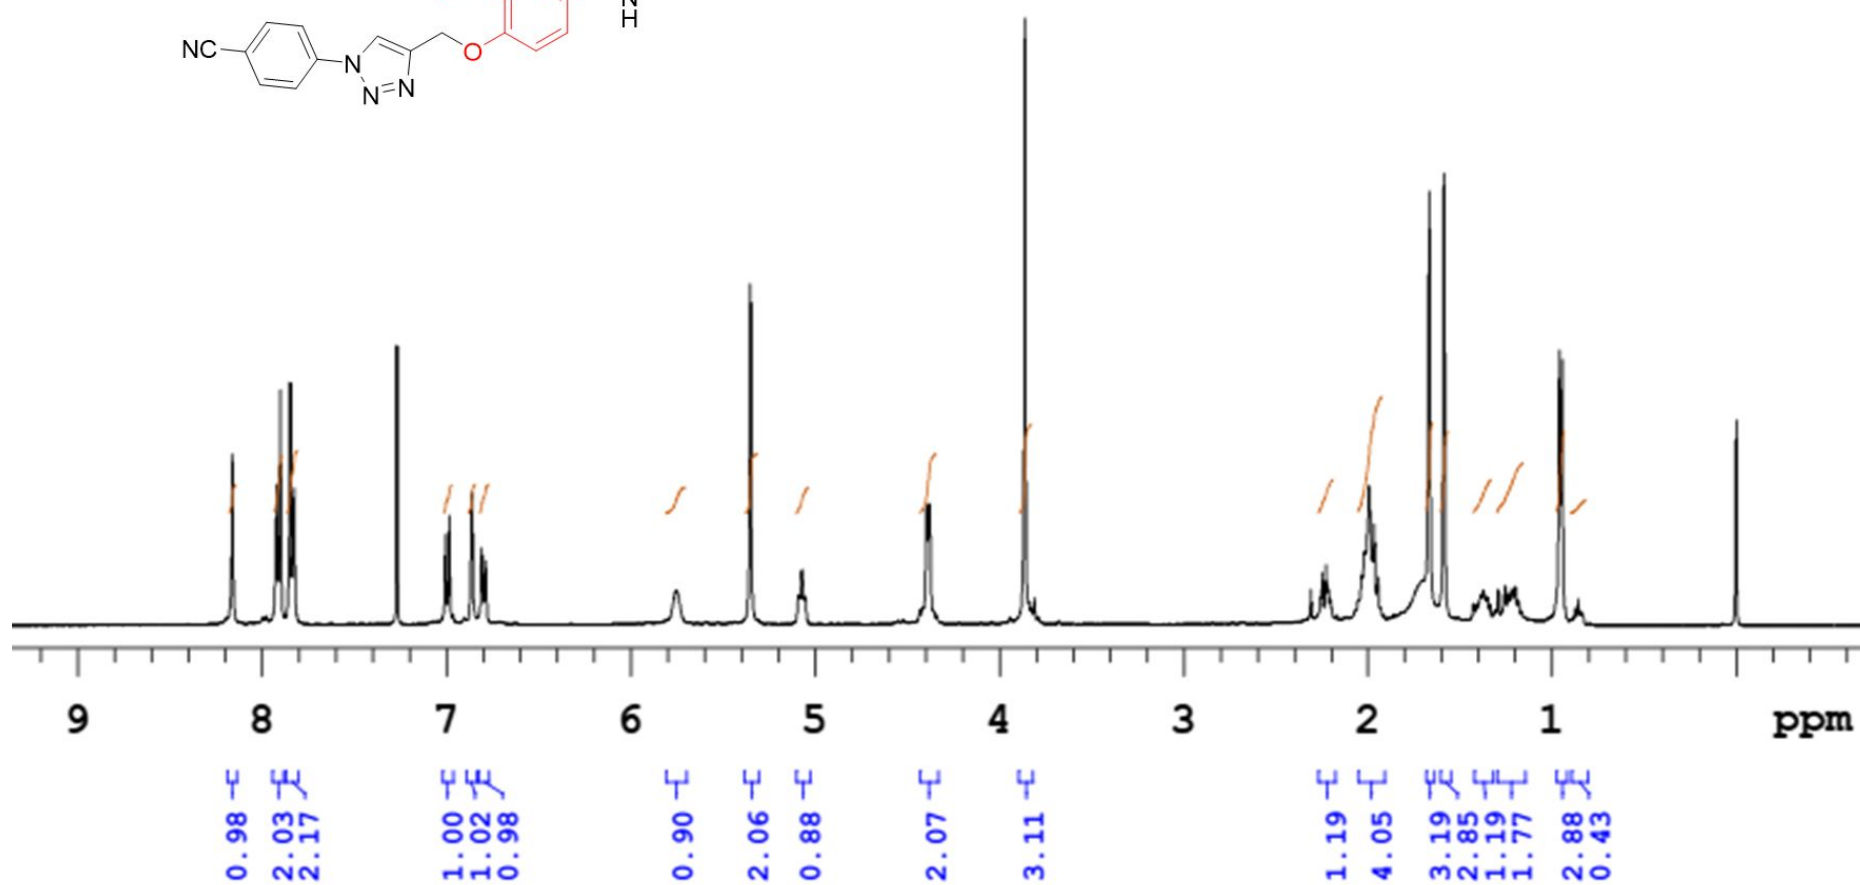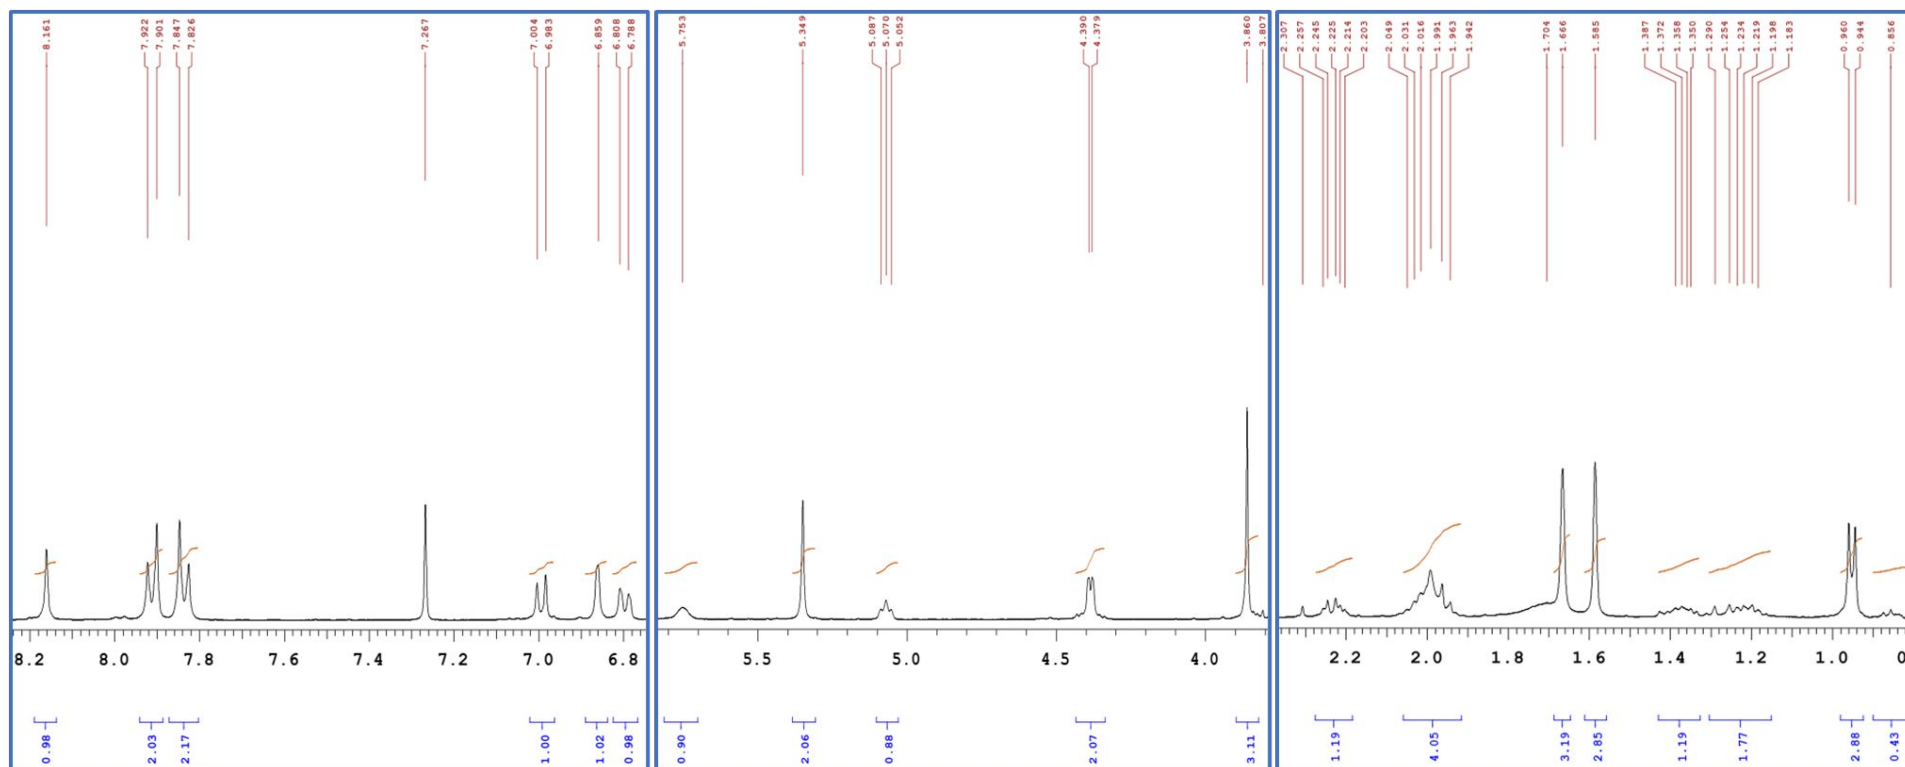

<sup>13</sup>C-NMR  
18m

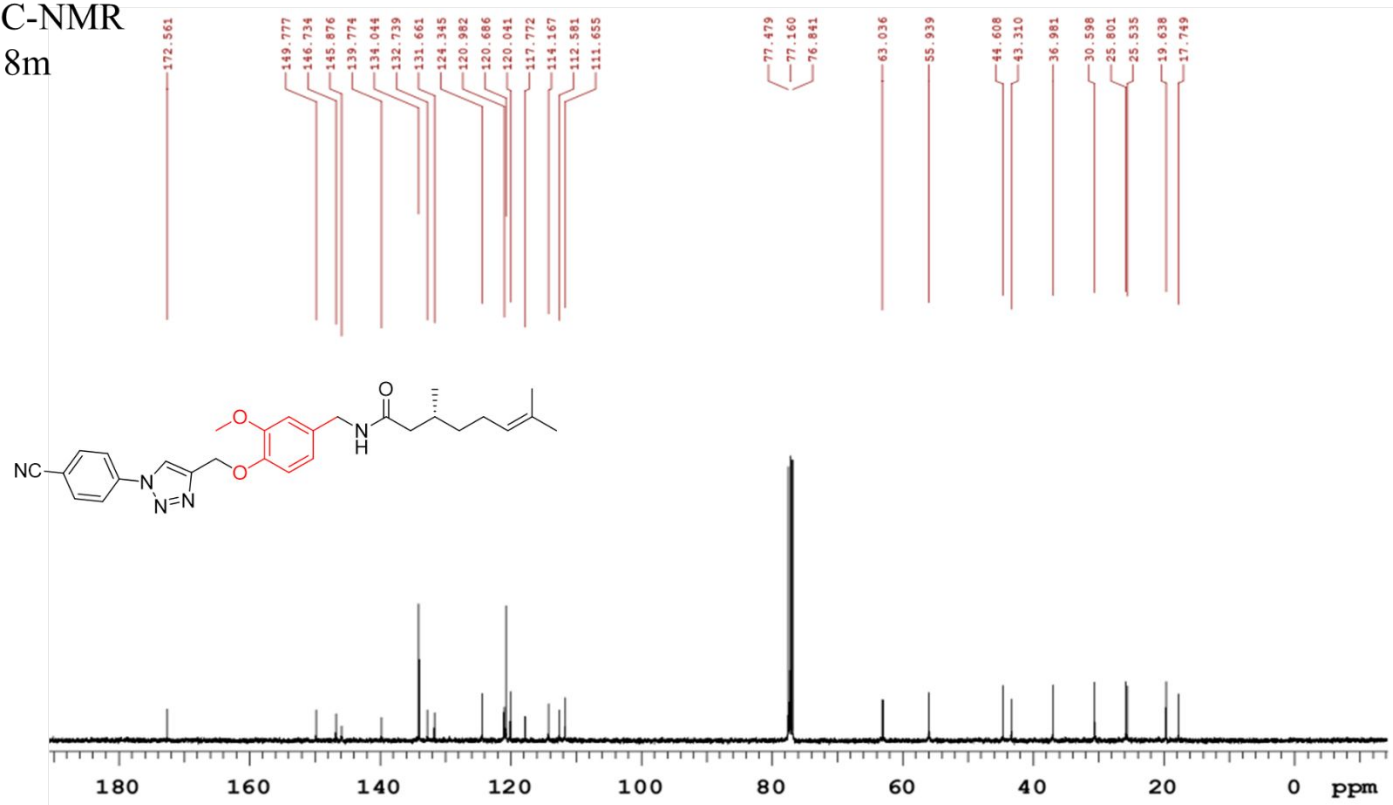



**Sample Information**

Sample Name : SA 14

Tray# : 1

Injection Volume : 0.5

Method File : MASS SCANNN 13APRIL2021.lcm

Date Processed : 12/20/2021 1:20:19 PM

Sample ID

Vial#

Data File

Processed by

:

: 16

: 20-12-2021 Jled16.lcd

: System Administrator

**LC-MS spectra**

**18m**

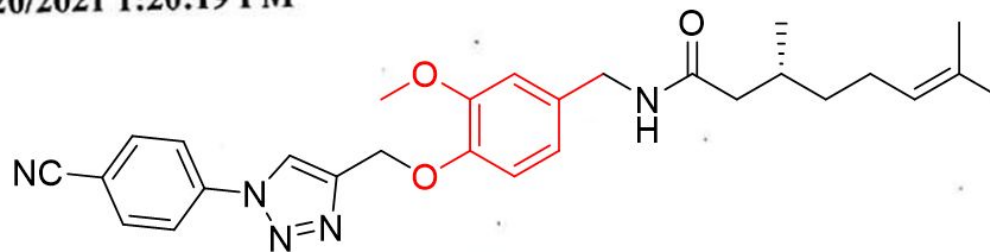

MS Spectrum

BG Mode: Averaged 0.412-0.961(49-113) Segment 1 - Event 1

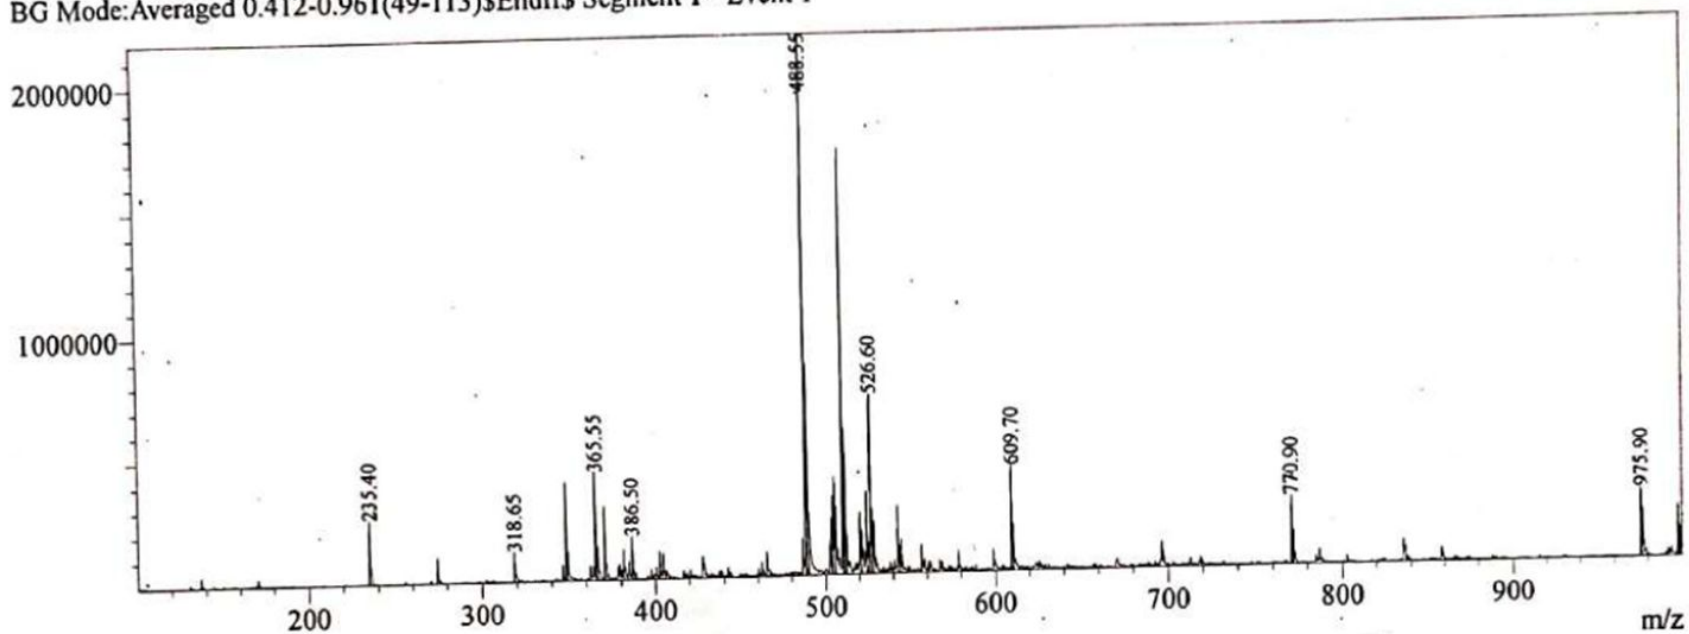

<sup>1</sup>H-NMR

18n

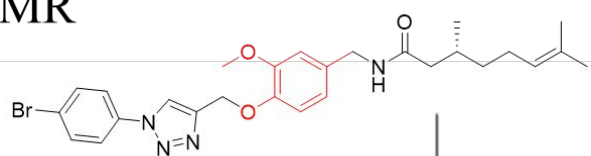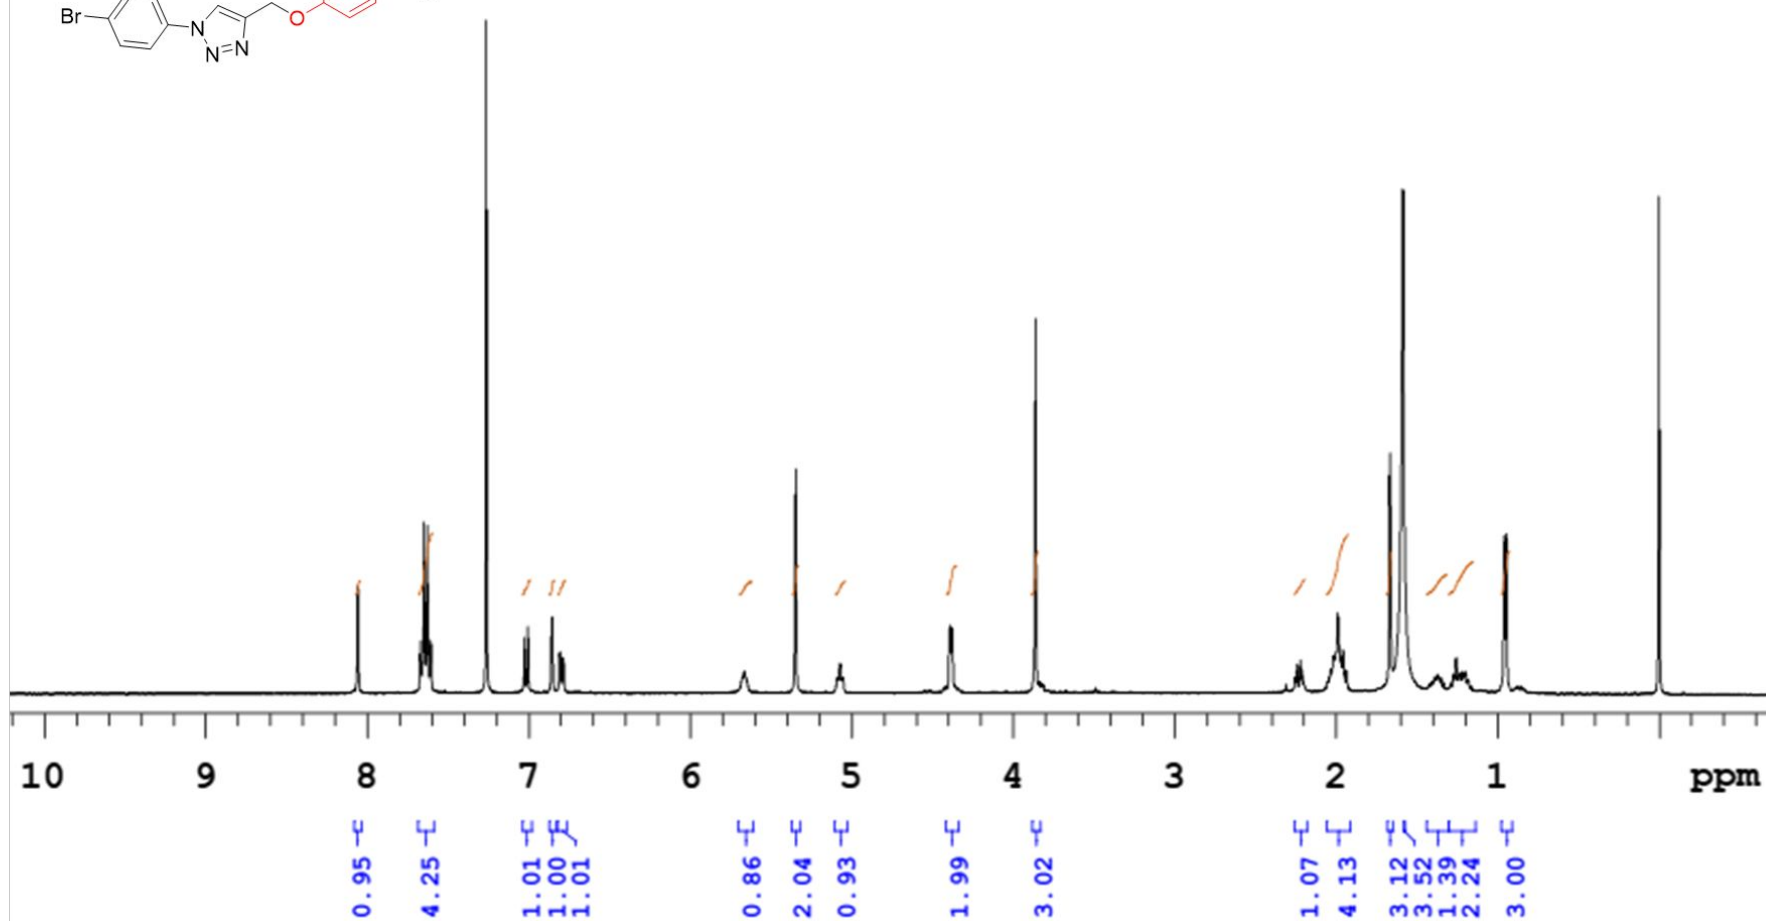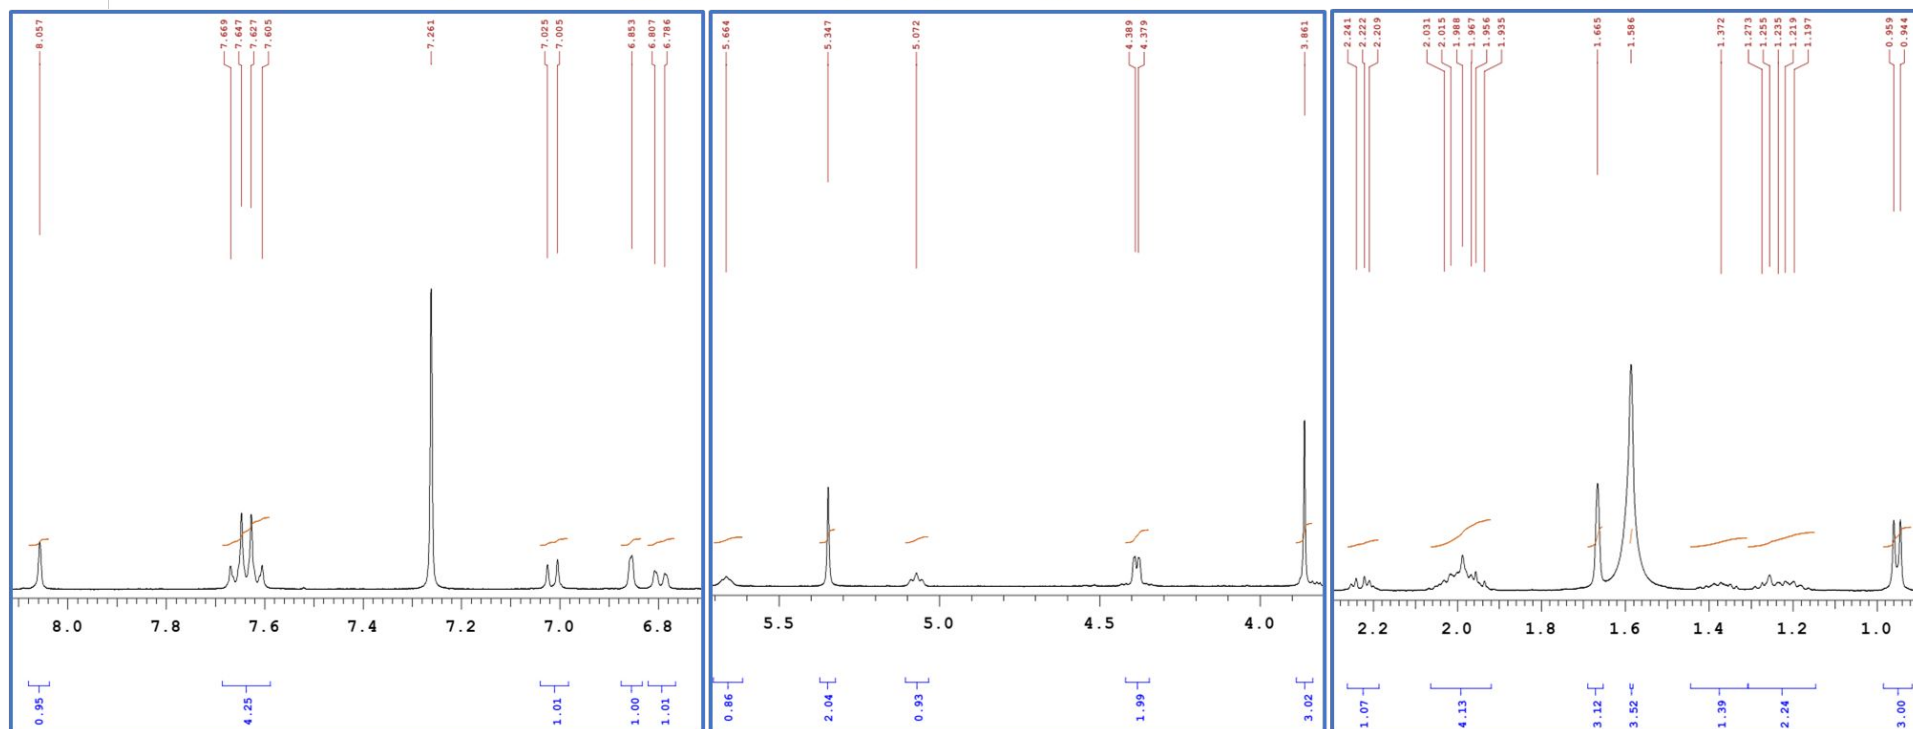

<sup>13</sup>C-NMR  
18n

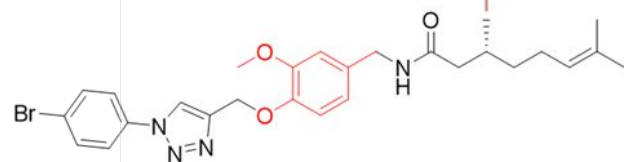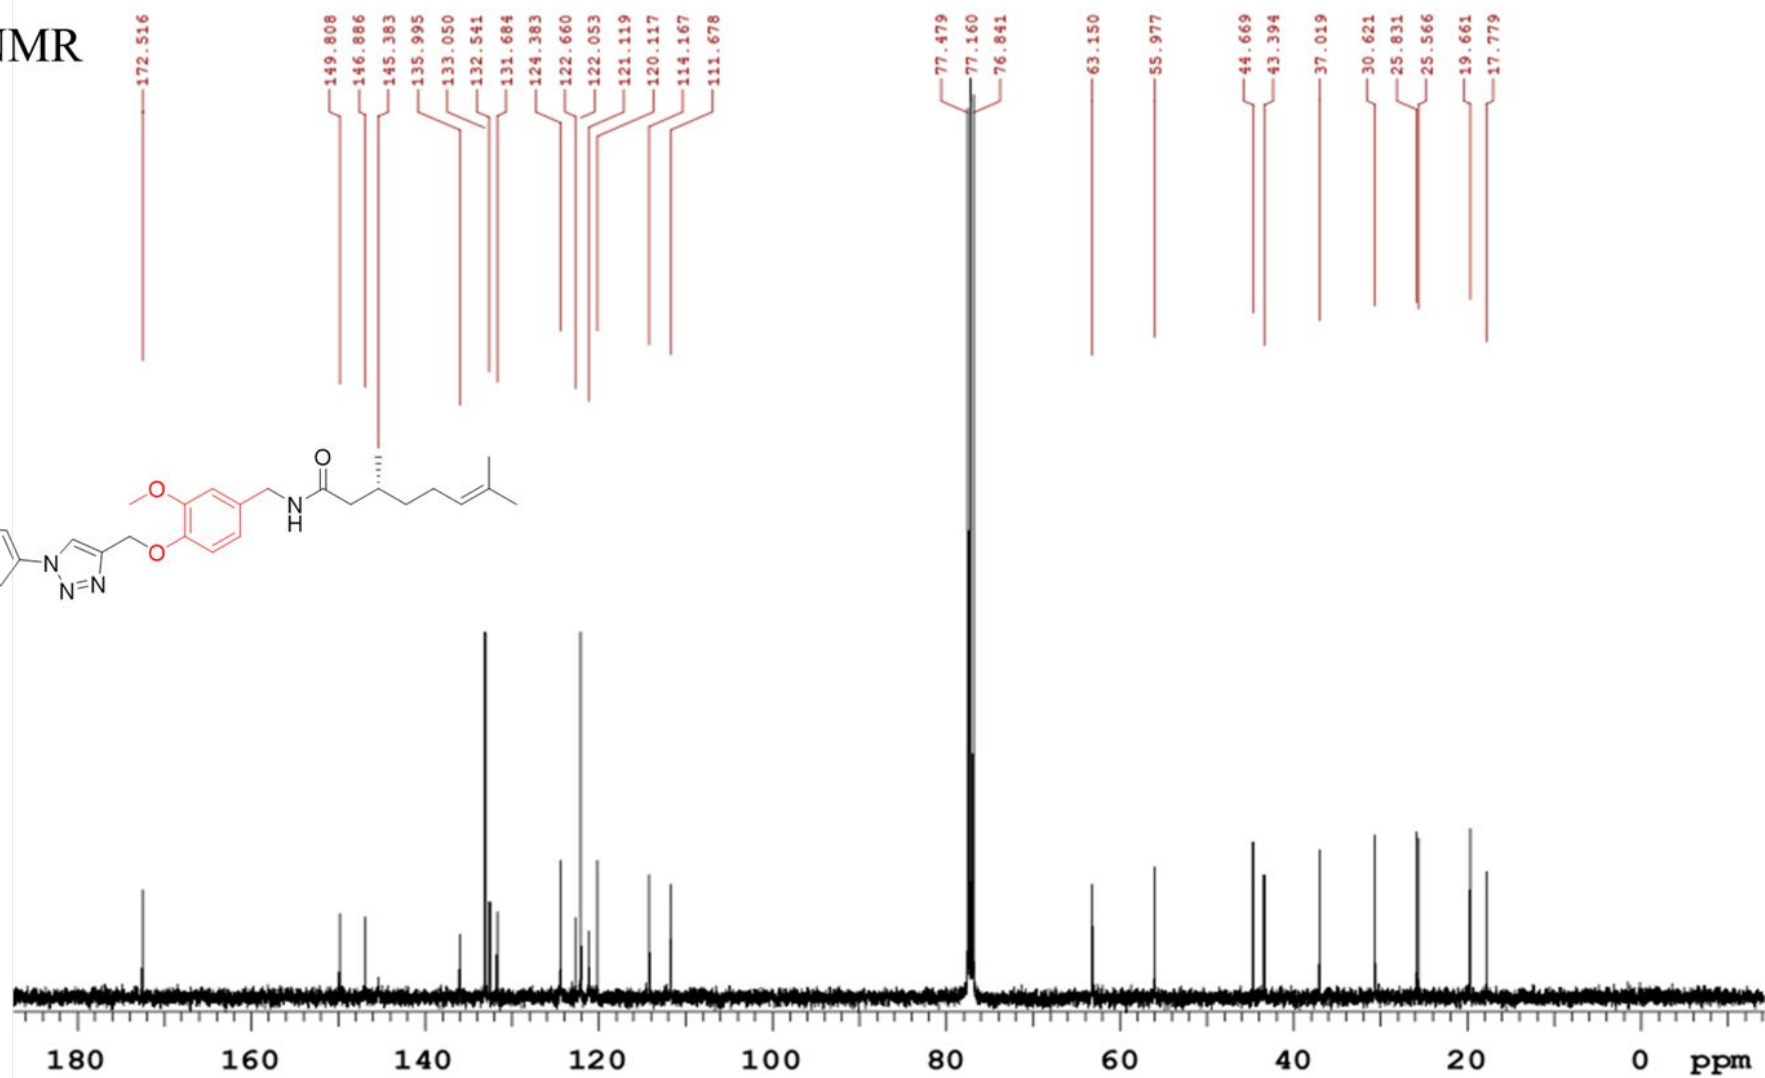

**Sample Information**

Sample Name : SA 15  
Tray# : 1  
Injection Volume : 0.5  
Method File : MASS SCANN 13APRIL2021.lcm  
Date Processed : 12/20/2021 1:18:32 PM

Sample ID :  
Vial# : 15  
Data File : 20-12-2021 Jlcd15.lcd  
Processed by : System Administrator

**LC-MS Spectra**  
**18n**

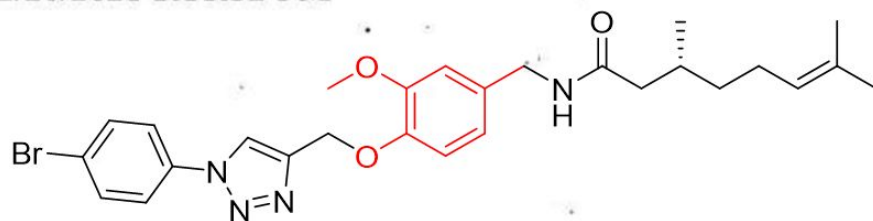

MS Spectrum

BG Mode:Averaged 0.395-0.961(47-113)\$EndIf\$ Segment 1 - Event 1

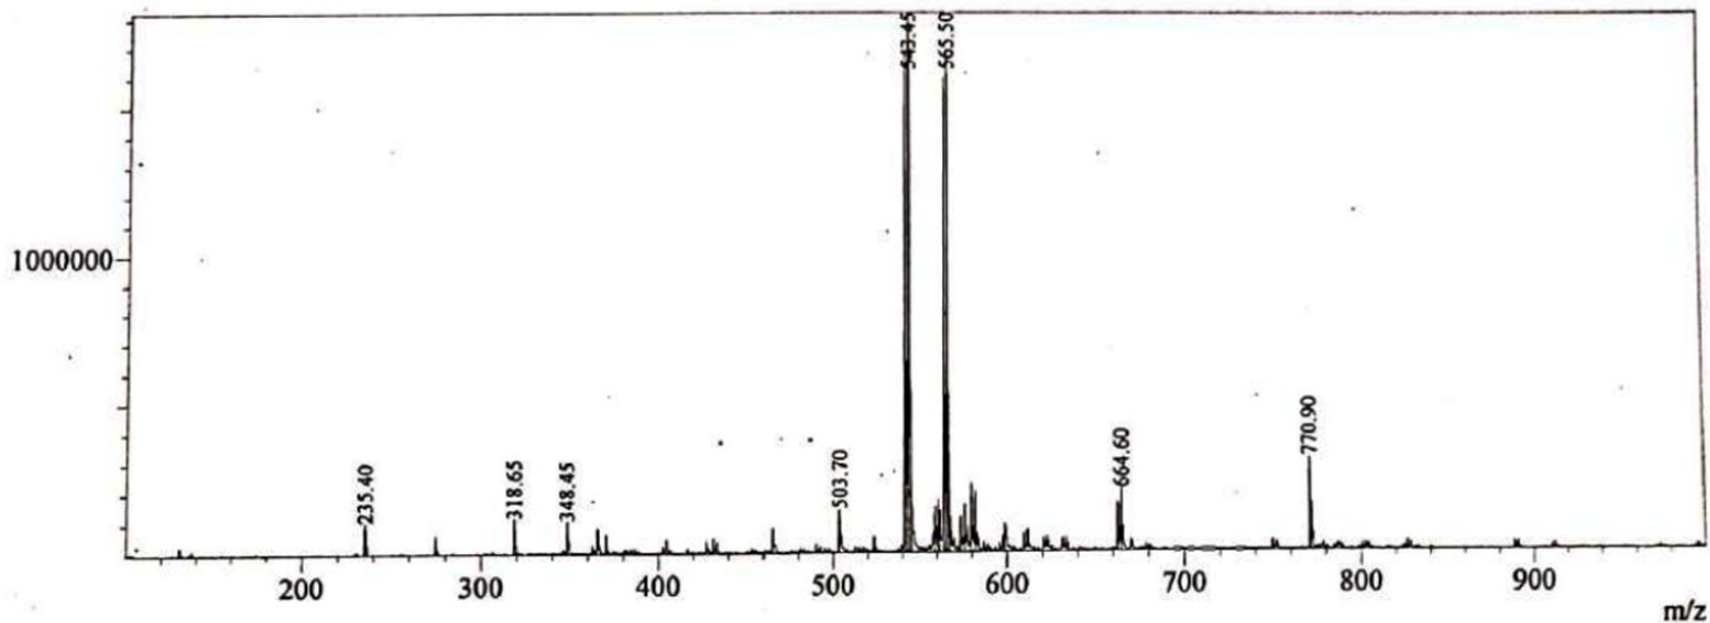

<sup>1</sup>H-NMR  
180

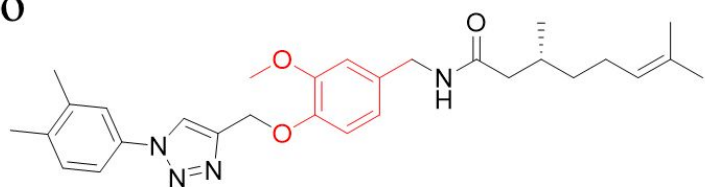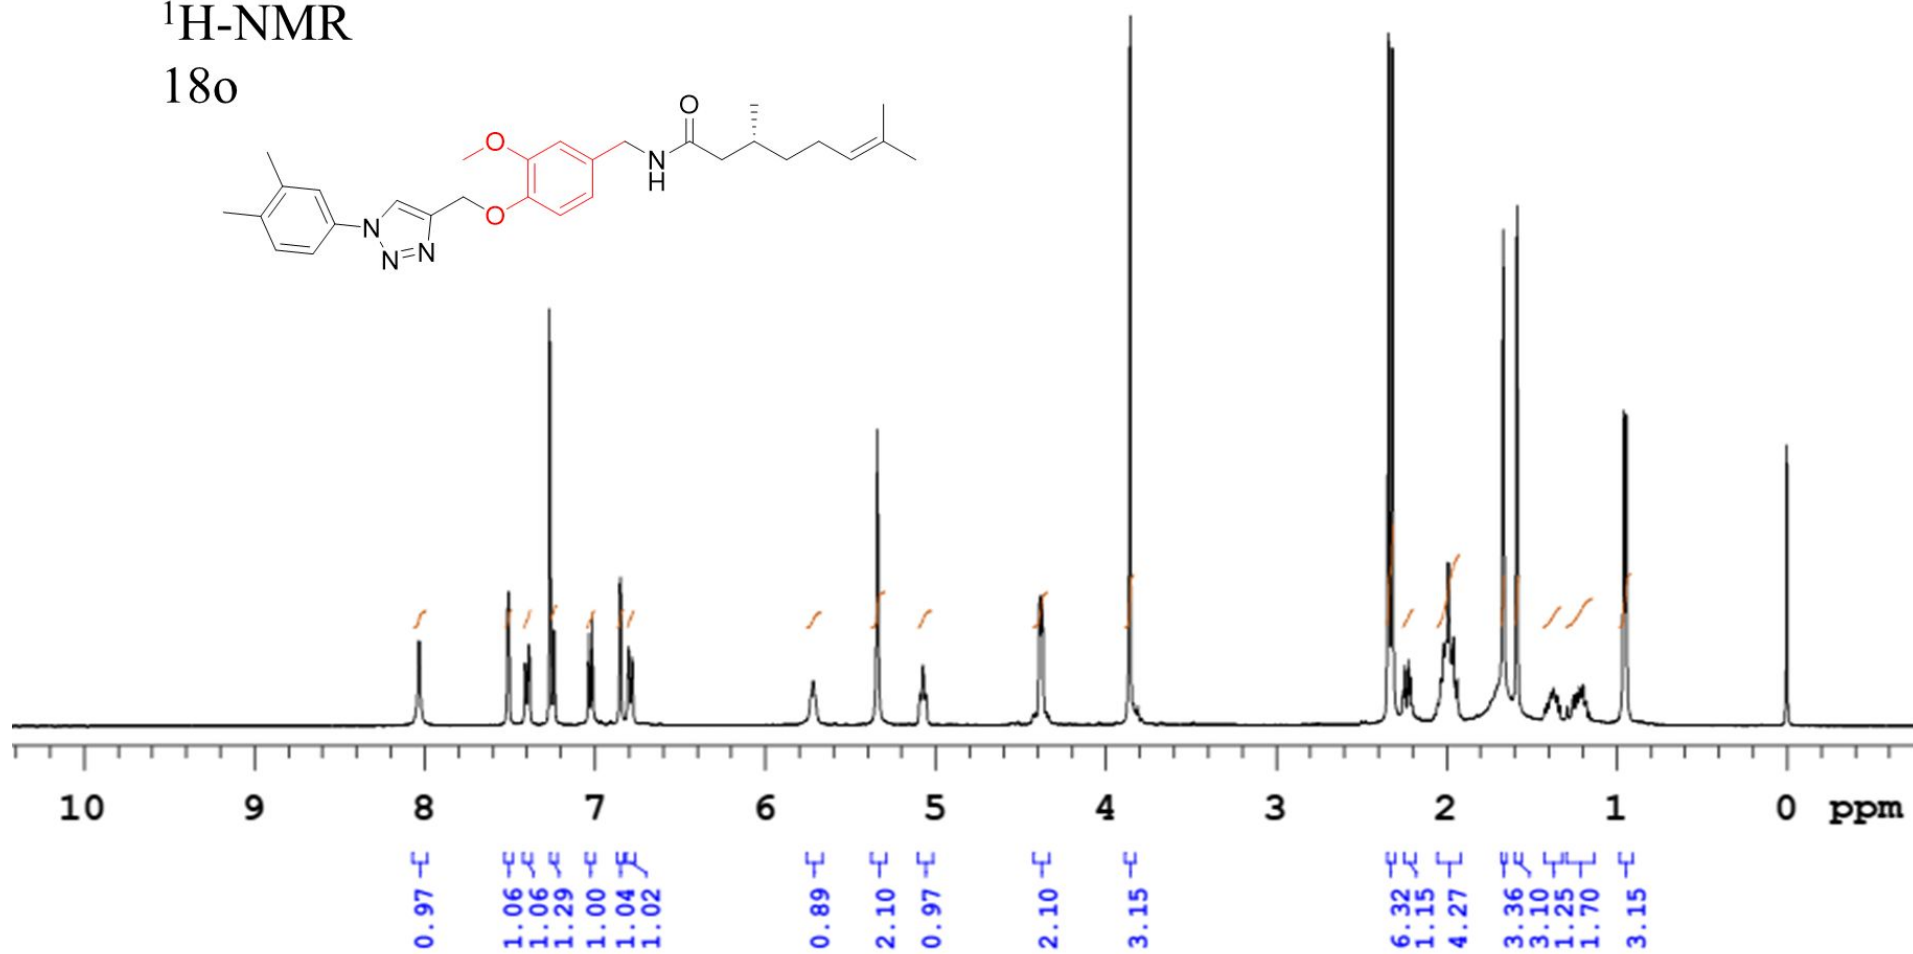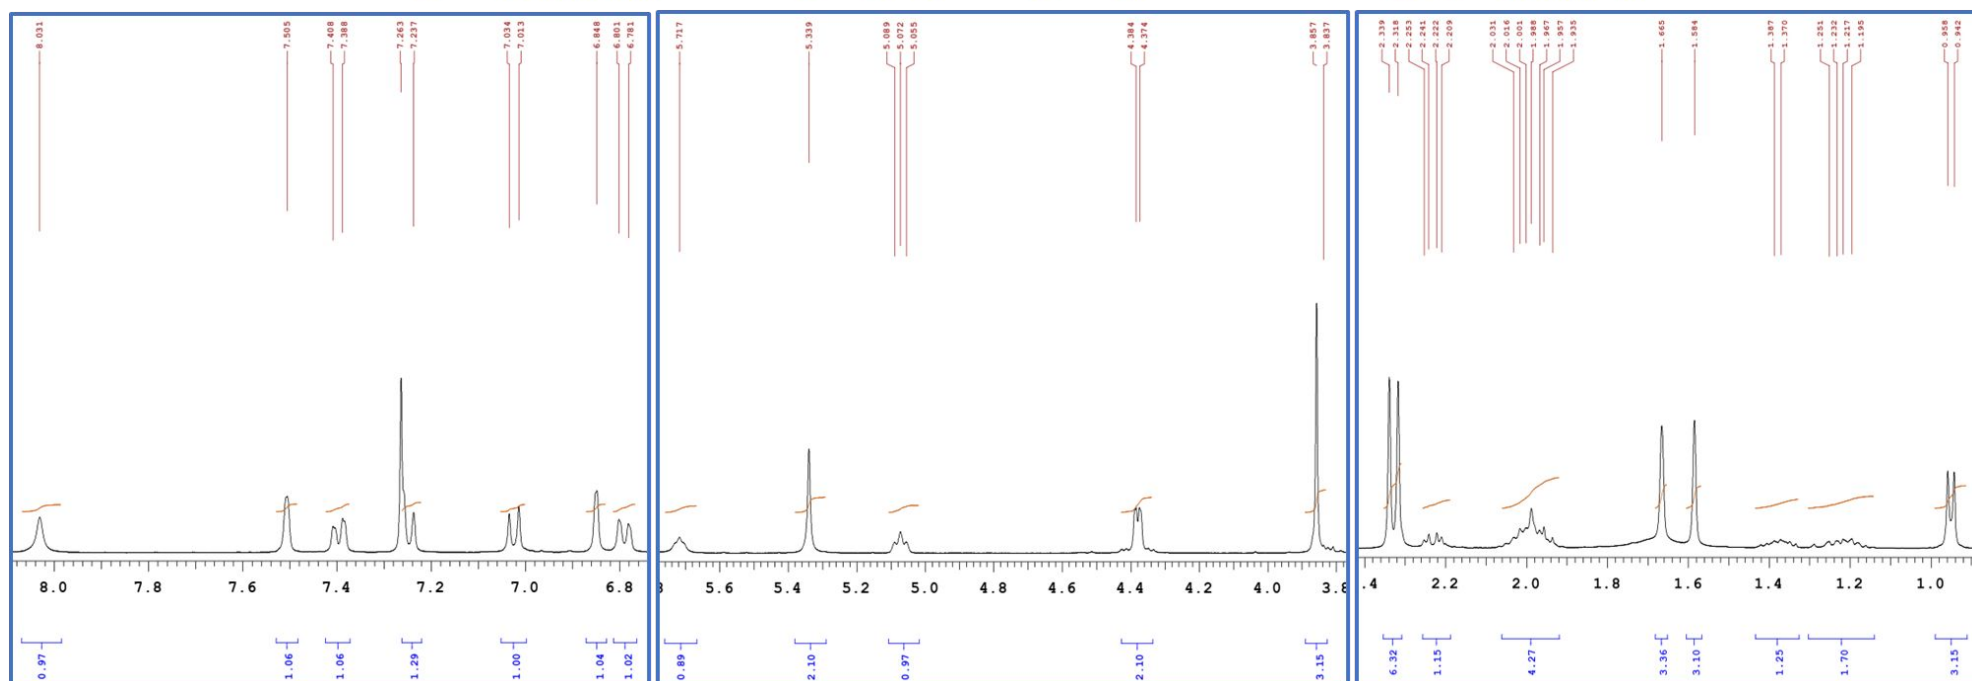

$^{13}\text{C}$ -NMR  
180

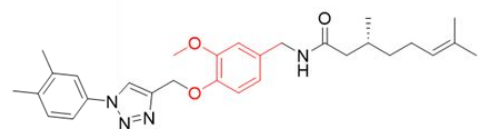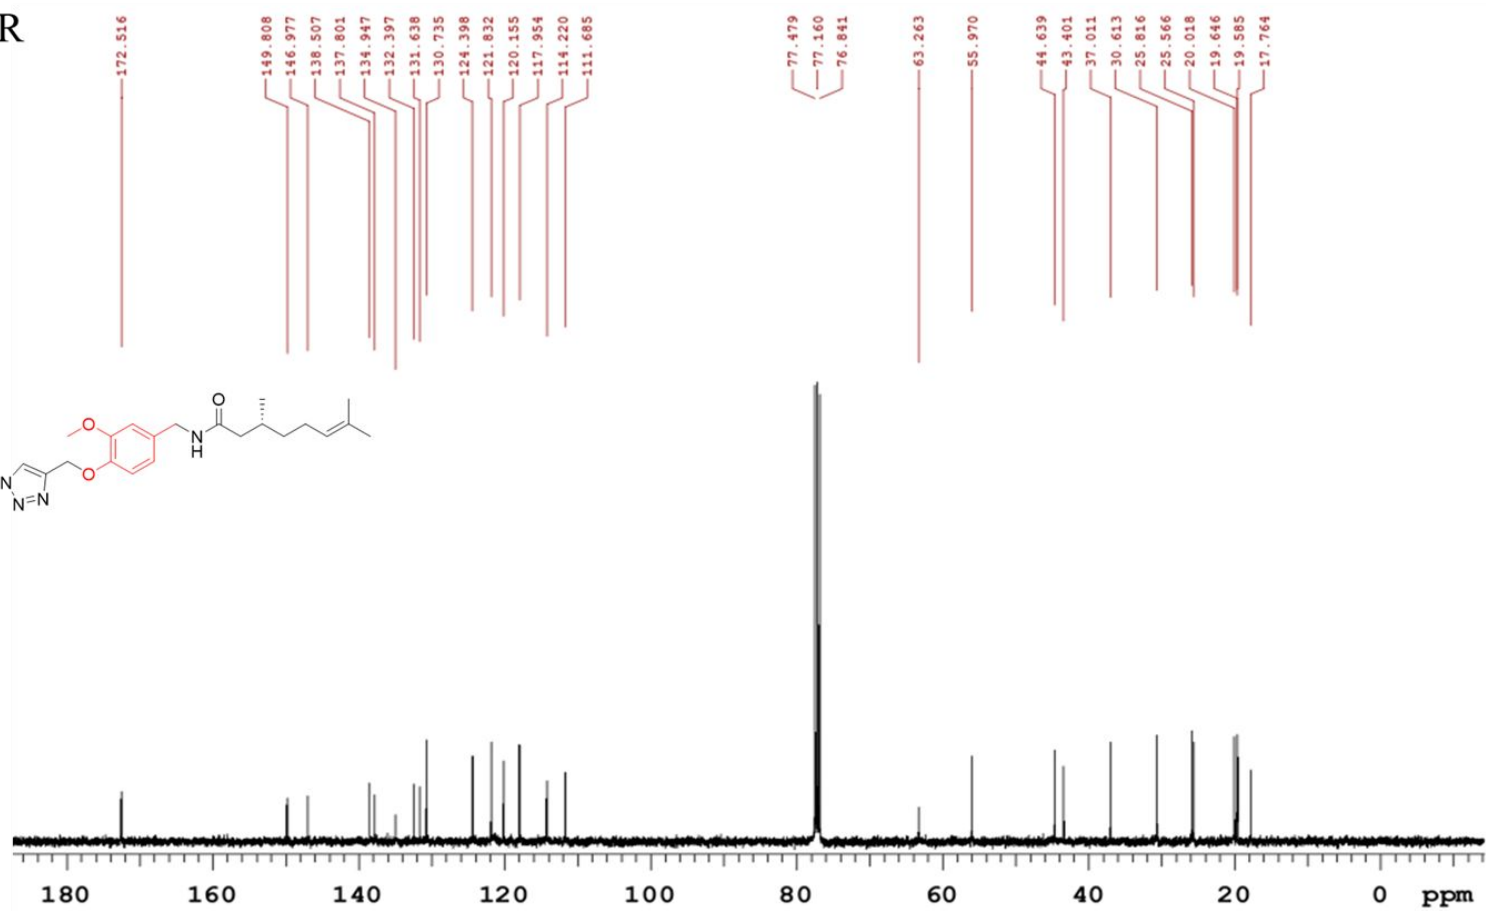

**Sample Information**

Sample Name : SA 16  
Tray# : 1  
Injection Volume : 0.5  
Method File : MASS SCANNN 13APRIL2021.lcm  
Date Processed : 12/20/2021 1:14:56 PM

Sample ID :  
Vial# : 13  
Data File : 20-12-2021 Jlcd13.lcd

Processed by : System Administrator

**LC-MS Spectra**  
**180**

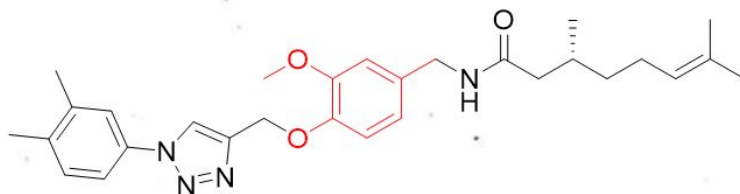

MS Spectrum

BG Mode:Averaged 0.464-0.961(55-113)\$EndIf\$ Segment 1 - Event 1

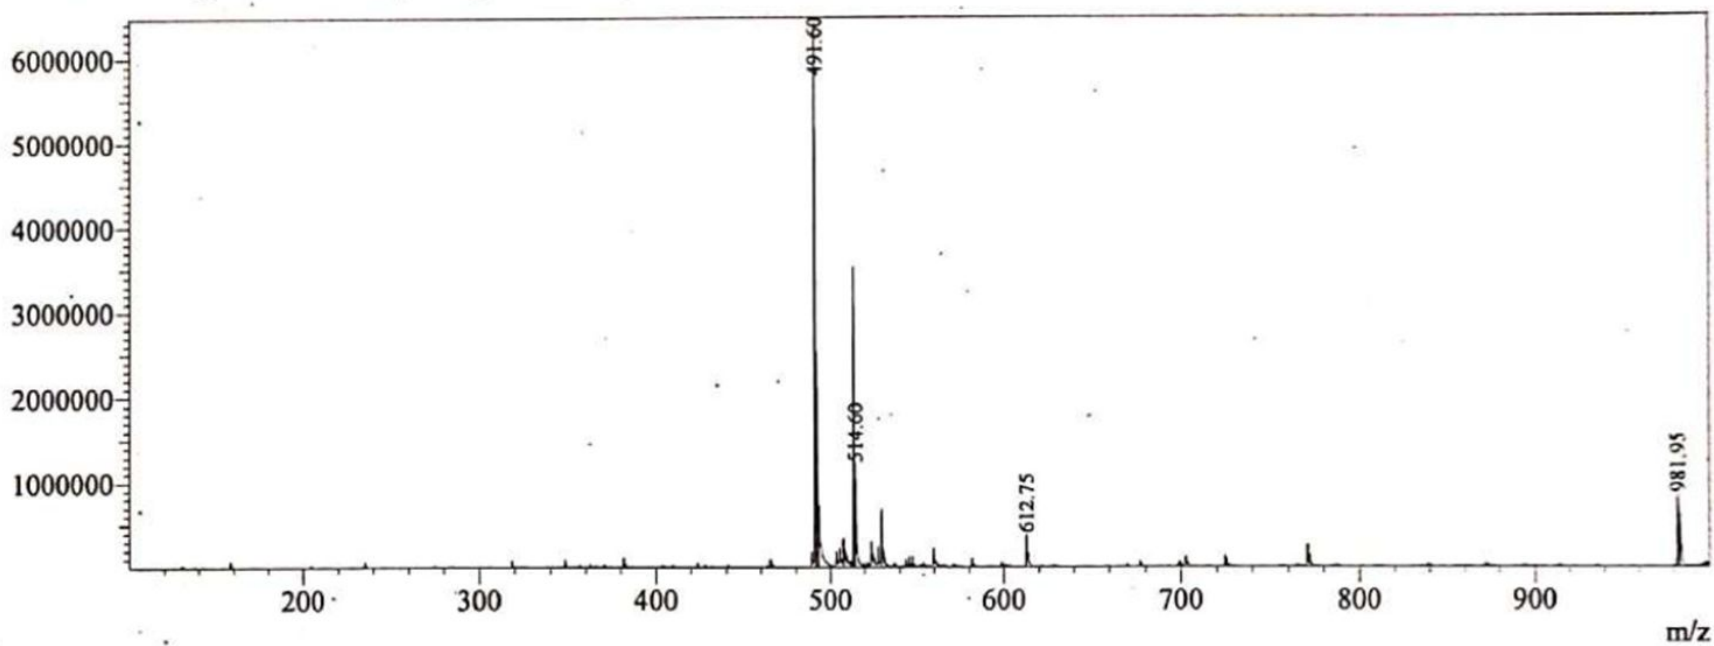

Supplement: ao2c03325_si_001.pdf [file ao2c03325_si_001.pdf]
